# Supplementary material for: Immunomodulatory Effect of Withania somnifera (Ashwagandha) Extract—A Randomized, Double-Blind, Placebo Controlled Trial with an Open Label Extension on Healthy Participants
Source: MDPI journal article supplement (doi:10.3390/jcm10163644), 2021-08-18
Supplement: s1 [file s1]

## Supplementary file 2. Bland-Altman Analysis of Immunoglobulins

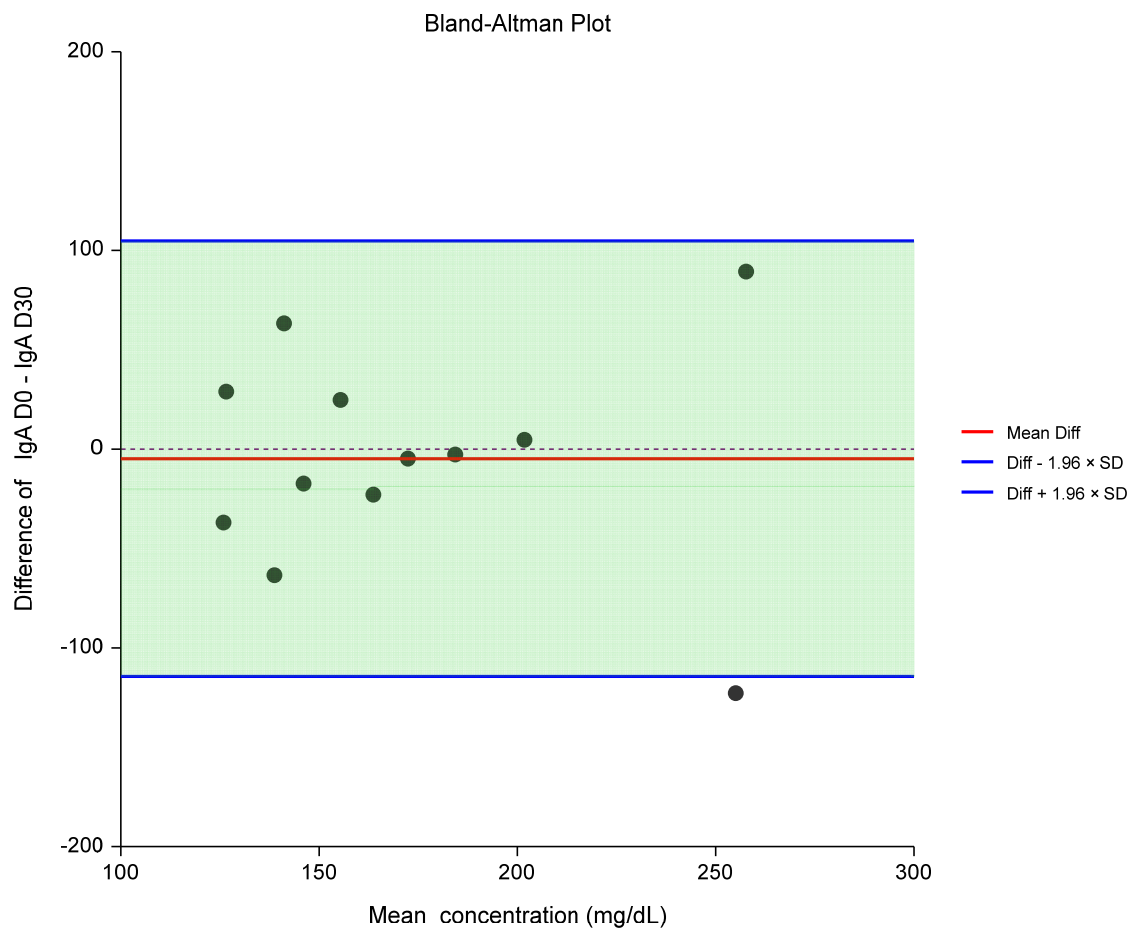

**Figure S1.** Bland-Altman plot of concentration of IgA for Day 0 and Day 30 in placebo group.

**Table S1.** Bias and Limits of Agreement of concentration of IgA for Day 0 and Day 30 in placebo group.

| Parameter                | Count | Value   | Standard Deviation | 95.0% LCL of Value | 95.0% UCL of Value |
|--------------------------|-------|---------|--------------------|--------------------|--------------------|
| Bias (Difference)        | 12    | -4.97   | 55.99              | -40.55             | 30.60              |
| Lower Limit of Agreement | 12    | -114.72 | 28.44              | -177.31            | -52.13             |
| Upper Limit of Agreement | 12    | 104.77  | 28.44              | 42.18              | 167.36             |

Limits of Agreement = Difference  $\pm$  1.96  $\times$  (Standard Deviation of Difference).

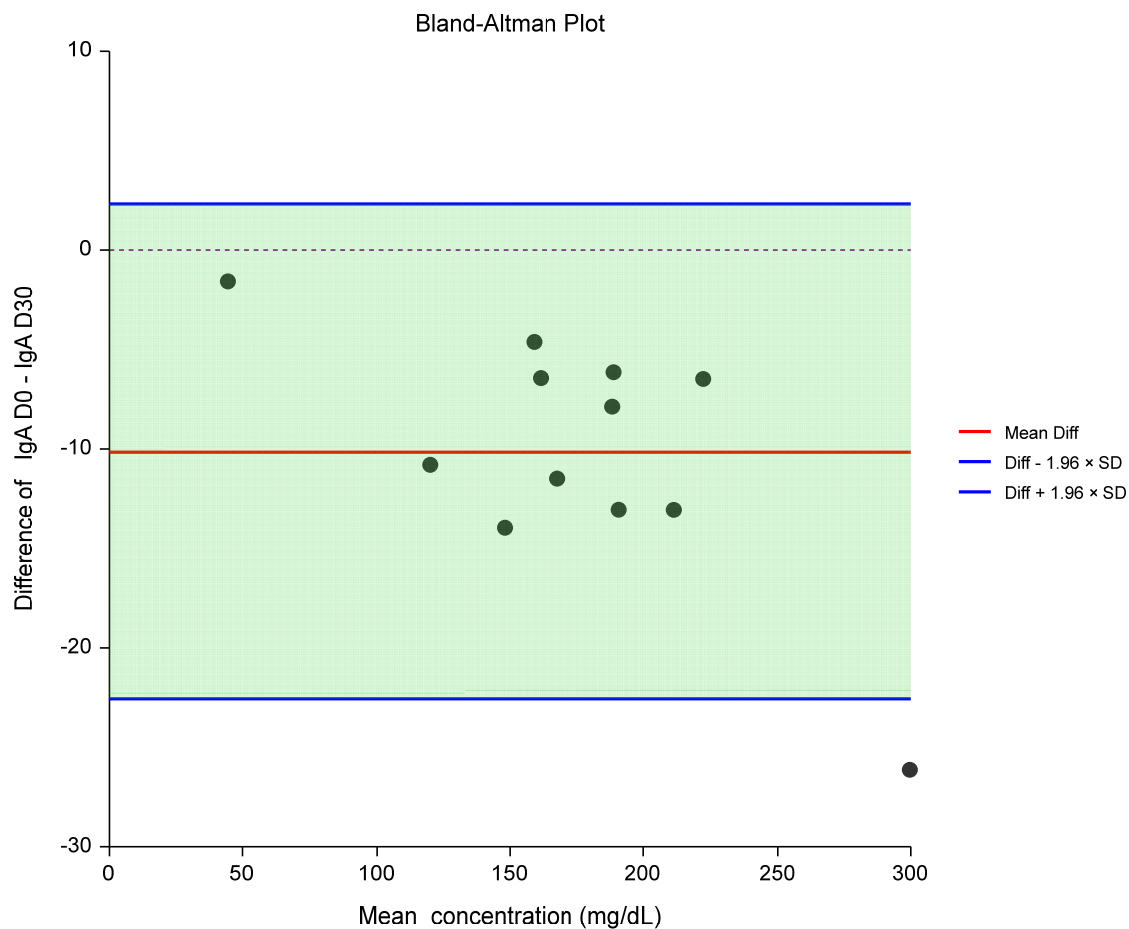

**Figure S2.** Bland-Altman plot of concentration of IgA for Day 0 and Day 30 in test group.

**Table S2.** Bias and Limits of Agreement of concentration of IgA for Day 0 and Day 30 in test group.

| Parameter                | Count | Value  | Standard Deviation | 95.0% LCL of Value | 95.0% UCL of Value |
|--------------------------|-------|--------|--------------------|--------------------|--------------------|
| Bias (Difference)        | 12    | -10.13 | 6.34               | -14.16             | -6.11              |
| Lower Limit of Agreement | 12    | -22.55 | 3.22               | -29.64             | -15.47             |
| Upper Limit of Agreement | 12    | 2.28   | 3.22               | -4.80              | 9.37               |

Limits of Agreement = Difference  $\pm$  1.96  $\times$  (Standard Deviation of Difference).

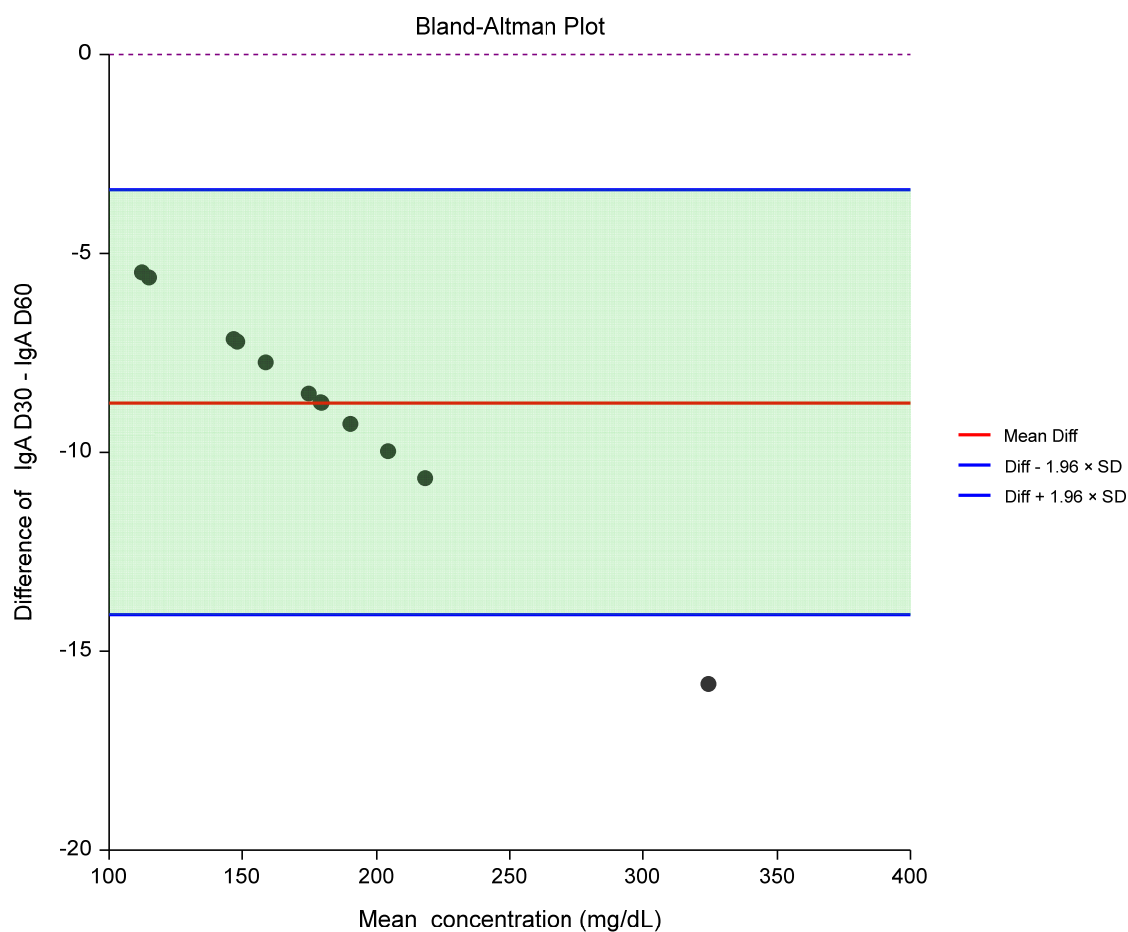

**Figure S3.** Bland-Altman plot of concentration of IgA for Day 30 and Day 60 in placebo crossed over to test group.

**Table S3.** Bias and Limits of Agreement of concentration of IgA for Day 30 and Day 60 in placebo crossed over to test group.

| Parameter                | Count | Value  | Standard Deviation | 95.0% LCL of Value | 95.0% UCL of Value |
|--------------------------|-------|--------|--------------------|--------------------|--------------------|
| Bias (Difference)        | 12    | -8.74  | 2.73               | -10.48             | -7.01              |
| Lower Limit of Agreement | 12    | -14.10 | 1.39               | -17.15             | -11.04             |
| Upper Limit of Agreement | 12    | -3.39  | 1.39               | -6.44              | -0.34              |

Limits of Agreement = Difference  $\pm$  1.96  $\times$  (Standard Deviation of Difference).

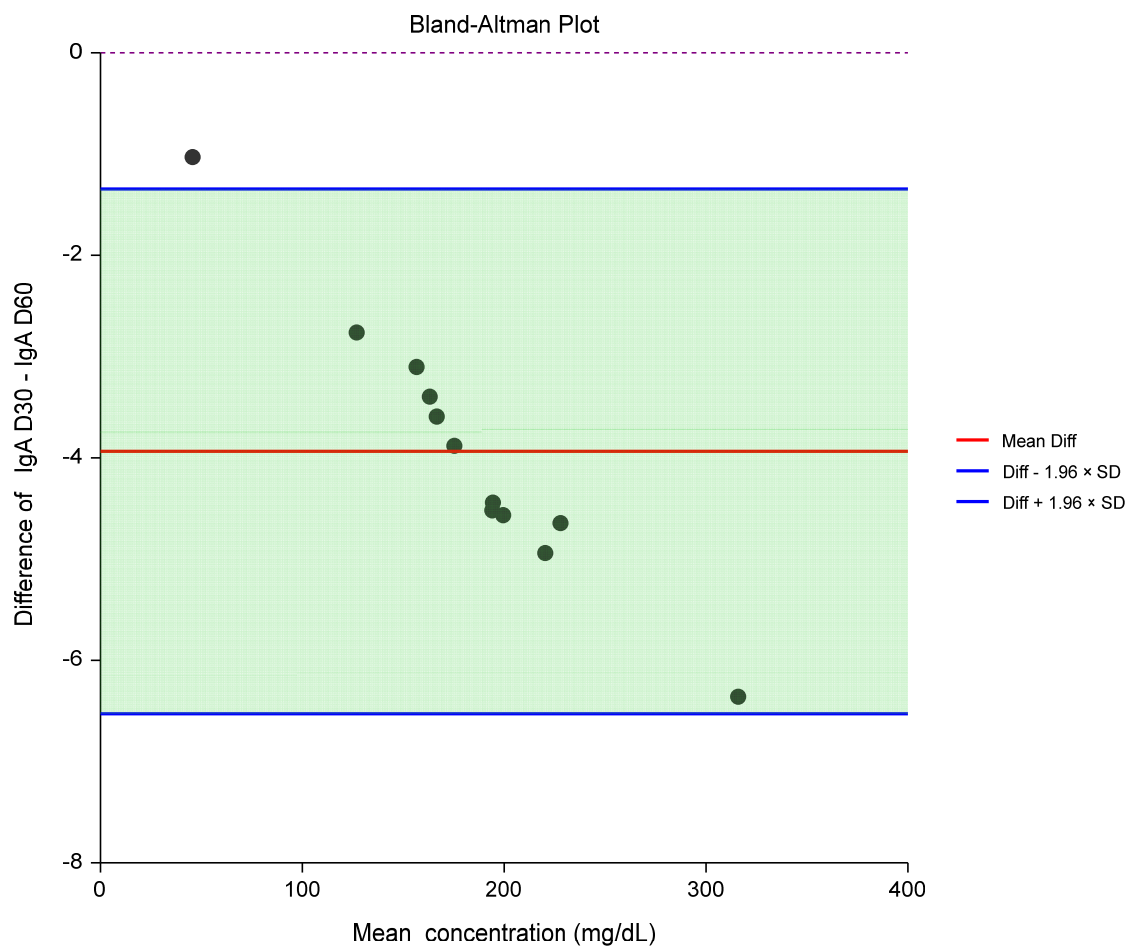

**Figure S4.** Bland-Altman plot of concentration of IgA for Day 30 and Day 60 in test group.

**Table S4.** Bias and Limits of Agreement of concentration of IgA for Day 30 and Day 60 in test group.

| Parameter                | Count | Value | Standard Deviation | 95.0% LCL of Value | 95.0% UCL of Value |
|--------------------------|-------|-------|--------------------|--------------------|--------------------|
| Bias (Difference)        | 12    | -3.94 | 1.33               | -4.78              | -3.09              |
| Lower Limit of Agreement | 12    | -6.53 | 0.67               | -8.01              | -5.05              |
| Upper Limit of Agreement | 12    | -1.34 | 0.67               | -2.82              | 0.14               |

Limits of Agreement = Difference  $\pm$  1.96  $\times$  (Standard Deviation of Difference).

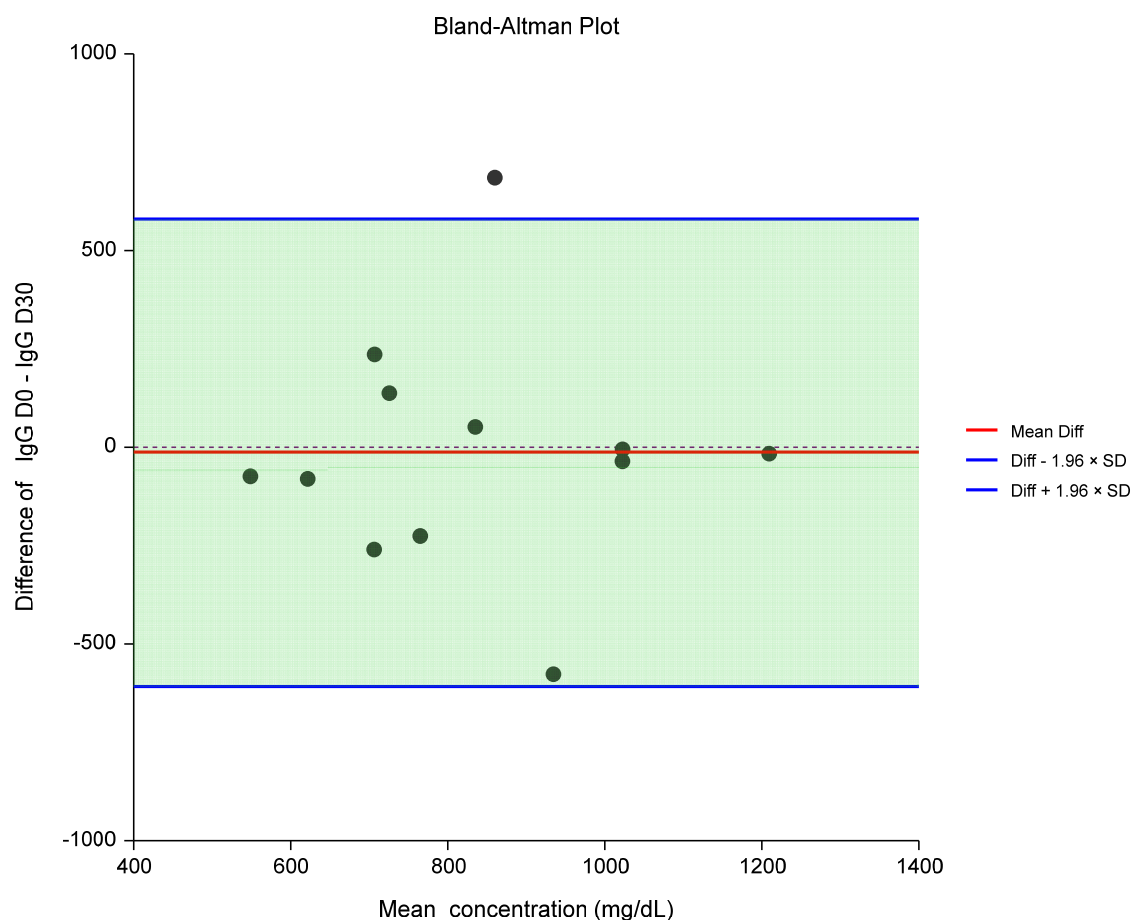

**Figure S5.** Bland-Altman plot of concentration of IgG for Day 0 and Day 30 in placebo group.

**Table S5.** Bias and Limits of Agreement of concentration of IgG for Day 0 and Day 30 in placebo group.

| Parameter                | Count | Value   | Standard Deviation | 95.0% LCL of Value | 95.0% UCL of Value |
|--------------------------|-------|---------|--------------------|--------------------|--------------------|
| Bias (Difference)        | 12    | -13.58  | 302.92             | -206.05            | 178.88             |
| Lower Limit of Agreement | 12    | -607.31 | 153.85             | -945.93            | -268.69            |
| Upper Limit of Agreement | 12    | 580.14  | 153.85             | 241.52             | 918.77             |

Limits of Agreement = Difference  $\pm$  1.96  $\times$  (Standard Deviation of Difference).

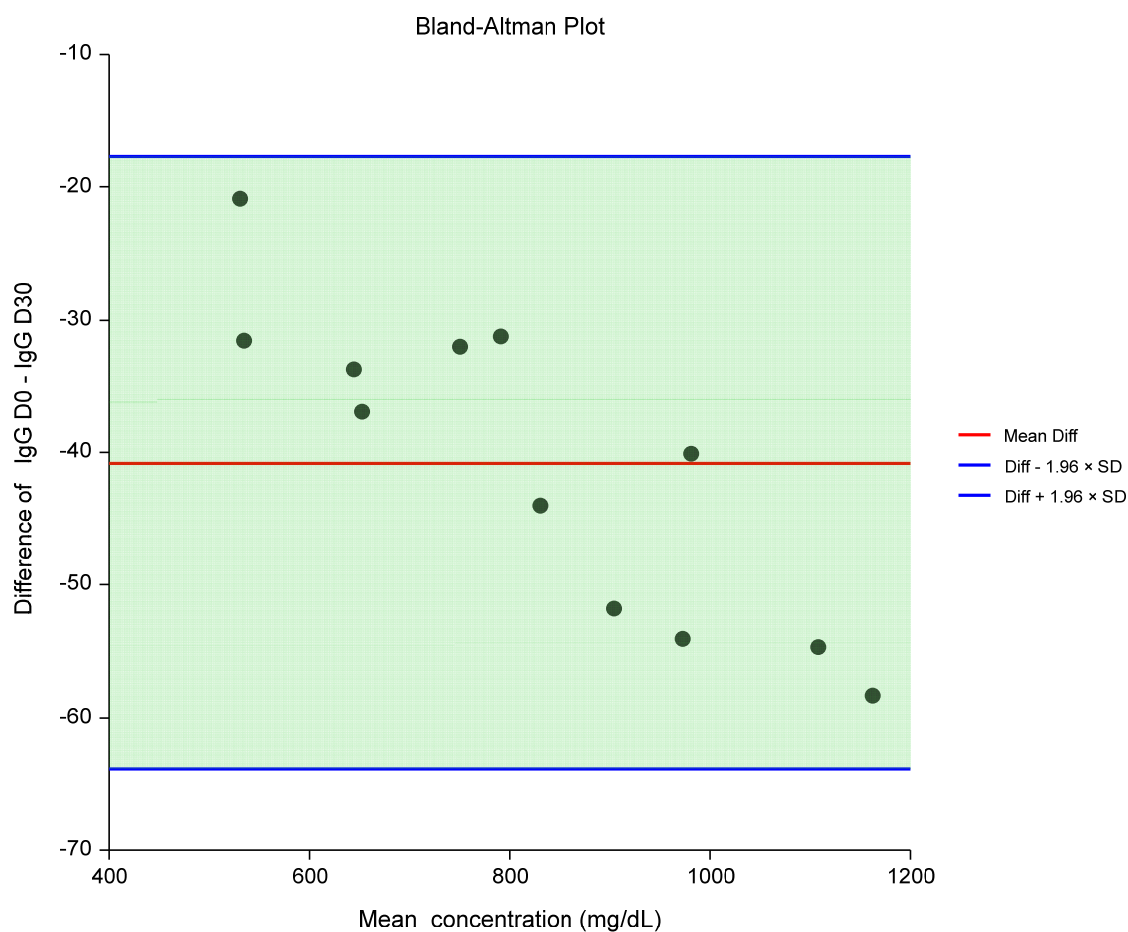

**Figure S6.** Bland-Altman plot of concentration of IgG for Day 0 and Day 30 in test group.

**Table S6.** Bias and Limits of Agreement of concentration of IgG for Day 0 and Day 30 in test group.

| Parameter                | Count | Value  | Standard Deviation | 95.0% LCL of Value | 95.0% UCL of Value |
|--------------------------|-------|--------|--------------------|--------------------|--------------------|
| Bias (Difference)        | 12    | -40.79 | 11.77              | -48.26             | -33.31             |
| Lower Limit of Agreement | 12    | -63.85 | 5.98               | -77.00             | -50.70             |
| Upper Limit of Agreement | 12    | -17.72 | 5.98               | -30.88             | -4.57              |

Limits of Agreement = Difference  $\pm$  1.96  $\times$  (Standard Deviation of Difference).

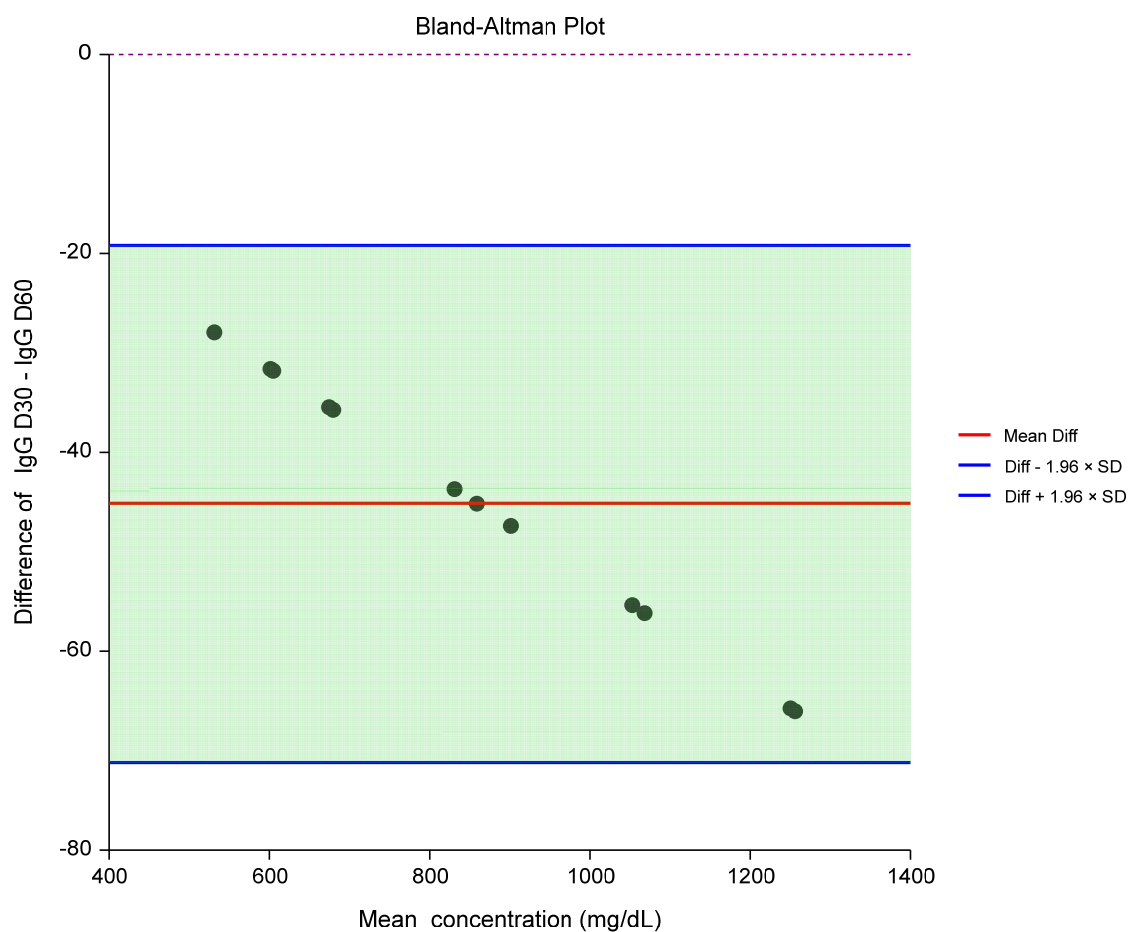

**Figure S7.** Bland-Altman plot of concentration of IgG for Day 30 and Day 60 in placebo crossed over to test group.

**Table S7.** Bias and Limits of Agreement of concentration of IgG for Day 30 and Day 60 in placebo crossed over to test group.

| Parameter                | Count | Value  | Standard Deviation | 95.0% LCL of Value | 95.0% UCL of Value |
|--------------------------|-------|--------|--------------------|--------------------|--------------------|
| Bias (Difference)        | 12    | -45.18 | 13.26              | -53.60             | -36.75             |
| Lower Limit of Agreement | 12    | -71.16 | 6.73               | -85.99             | -56.34             |
| Upper Limit of Agreement | 12    | -19.19 | 6.73               | -34.01             | -4.36              |

Limits of Agreement = Difference  $\pm$  1.96  $\times$  (Standard Deviation of Difference).

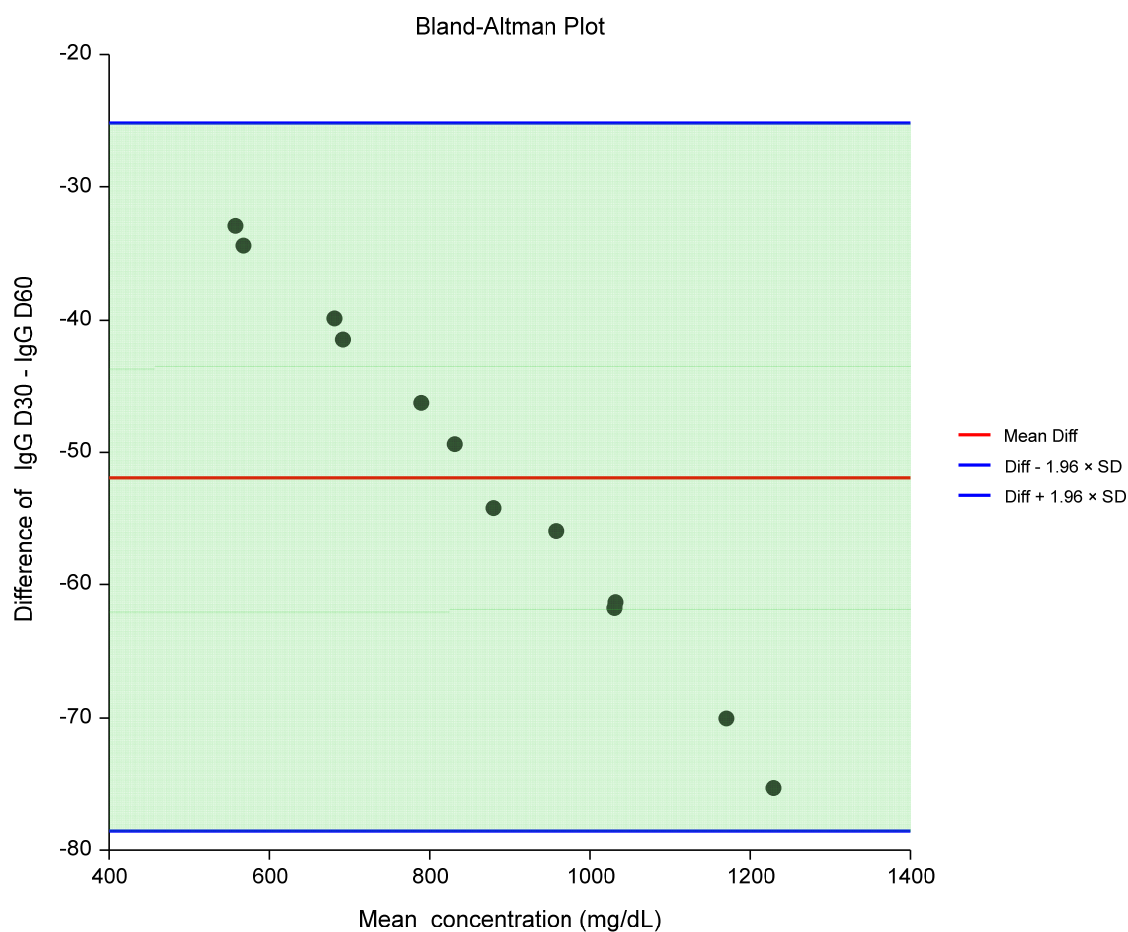

**Figure S8.** Bland-Altman plot of concentration of IgG for Day 30 and Day 60 in test group.

**Table S8.** Bias and Limits of Agreement of concentration of IgG for Day 30 and Day 60 in test group.

| Parameter                | Count | Value  | Standard Deviation | 95.0% LCL of Value | 95.0% UCL of Value |
|--------------------------|-------|--------|--------------------|--------------------|--------------------|
| Bias (Difference)        | 12    | -51.91 | 13.62              | -60.57             | -43.25             |
| Lower Limit of Agreement | 12    | -78.61 | 6.92               | -93.84             | -63.38             |
| Upper Limit of Agreement | 12    | -25.21 | 6.92               | -40.44             | -9.98              |

Limits of Agreement = Difference  $\pm$  1.96  $\times$  (Standard Deviation of Difference).



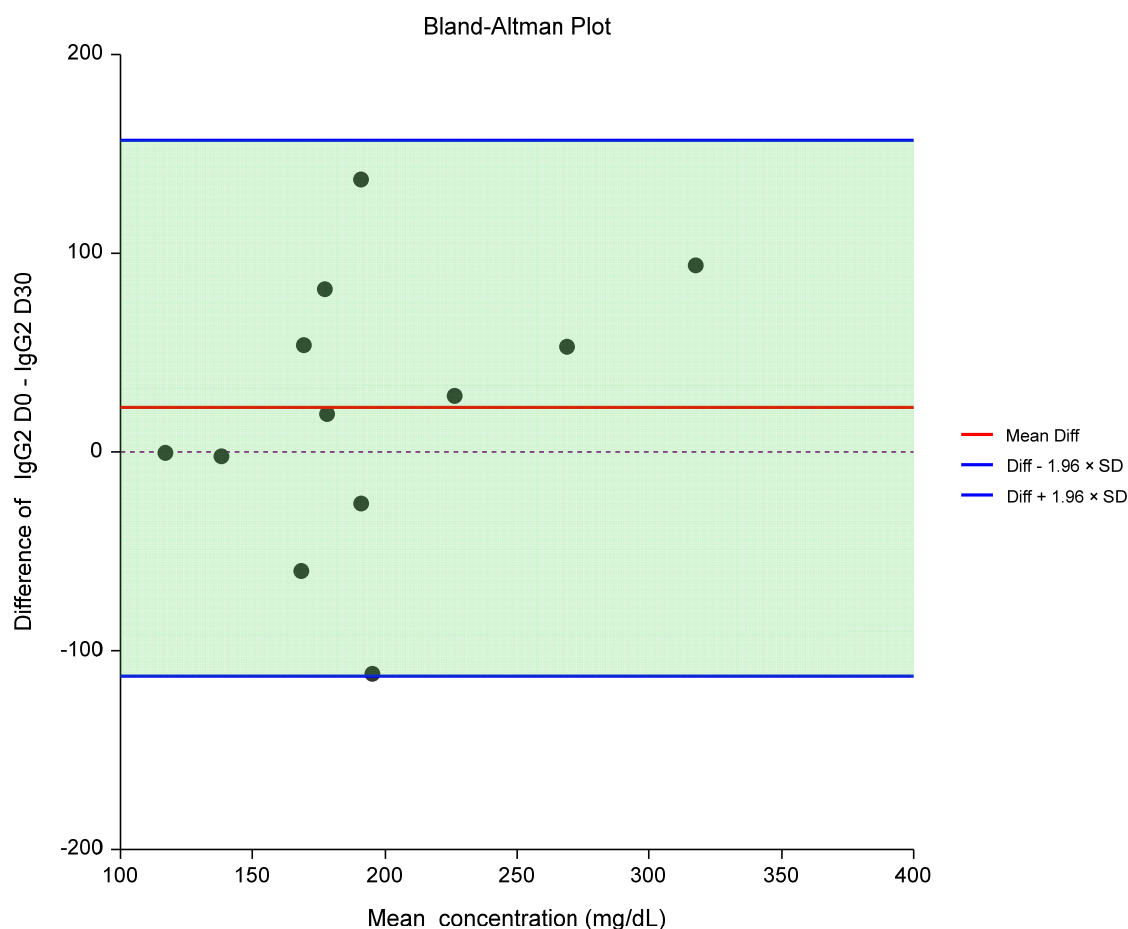

**Figure S9.** Bland-Altman plot of concentration of IgG2 for Day 0 and Day 30 in placebo group.

**Table S9.** Bias and Limits of Agreement of concentration of IgG2 for Day 0 and Day 30 in placebo group.

| Parameter                | Count | Value   | Standard Deviation | 95.0% LCL of Value | 95.0% UCL of Value |
|--------------------------|-------|---------|--------------------|--------------------|--------------------|
| Bias (Difference)        | 12    | 22.23   | 68.74              | -21.44             | 65.91              |
| Lower Limit of Agreement | 12    | -112.49 | 34.91              | -189.32            | -35.65             |
| Upper Limit of Agreement | 12    | 156.96  | 34.91              | 80.12              | 233.79             |

Limits of Agreement = Difference  $\pm$  1.96  $\times$  (Standard Deviation of Difference).

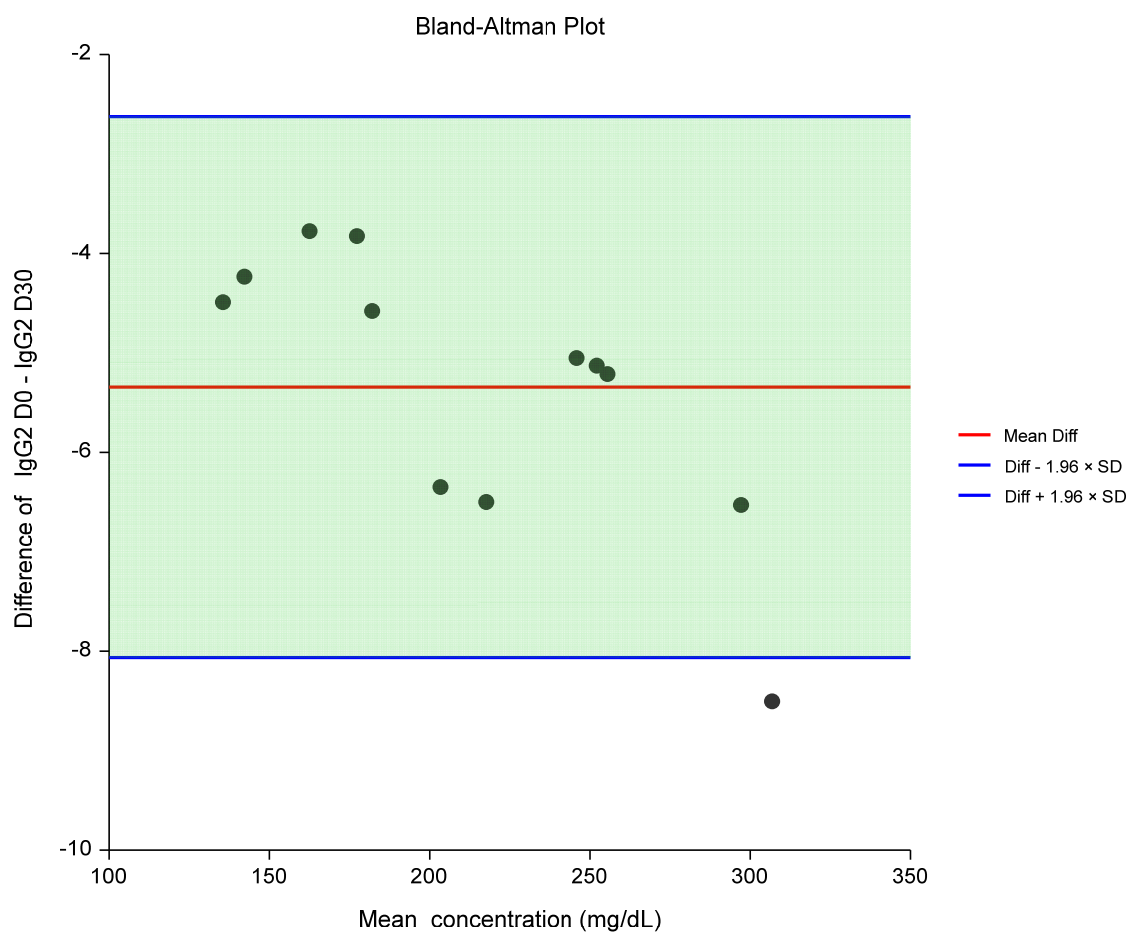

**Figure S10.** Bland-Altman plot of concentration of IgG2 for Day 0 and Day 30 in test group.

**Table S10.** Bias and Limits of Agreement of concentration of IgG2 for Day 0 and Day 30 in test group.

| Parameter                | Count | Value | Standard Deviation | 95.0% LCL of Value | 95.0% UCL of Value |
|--------------------------|-------|-------|--------------------|--------------------|--------------------|
| Bias (Difference)        | 12    | -5.35 | 1.39               | -6.23              | -4.47              |
| Lower Limit of Agreement | 12    | -8.07 | 0.71               | -9.62              | -6.52              |
| Upper Limit of Agreement | 12    | -2.63 | 0.71               | -4.18              | -1.07              |

Limits of Agreement = Difference  $\pm$  1.96  $\times$  (Standard Deviation of Difference).

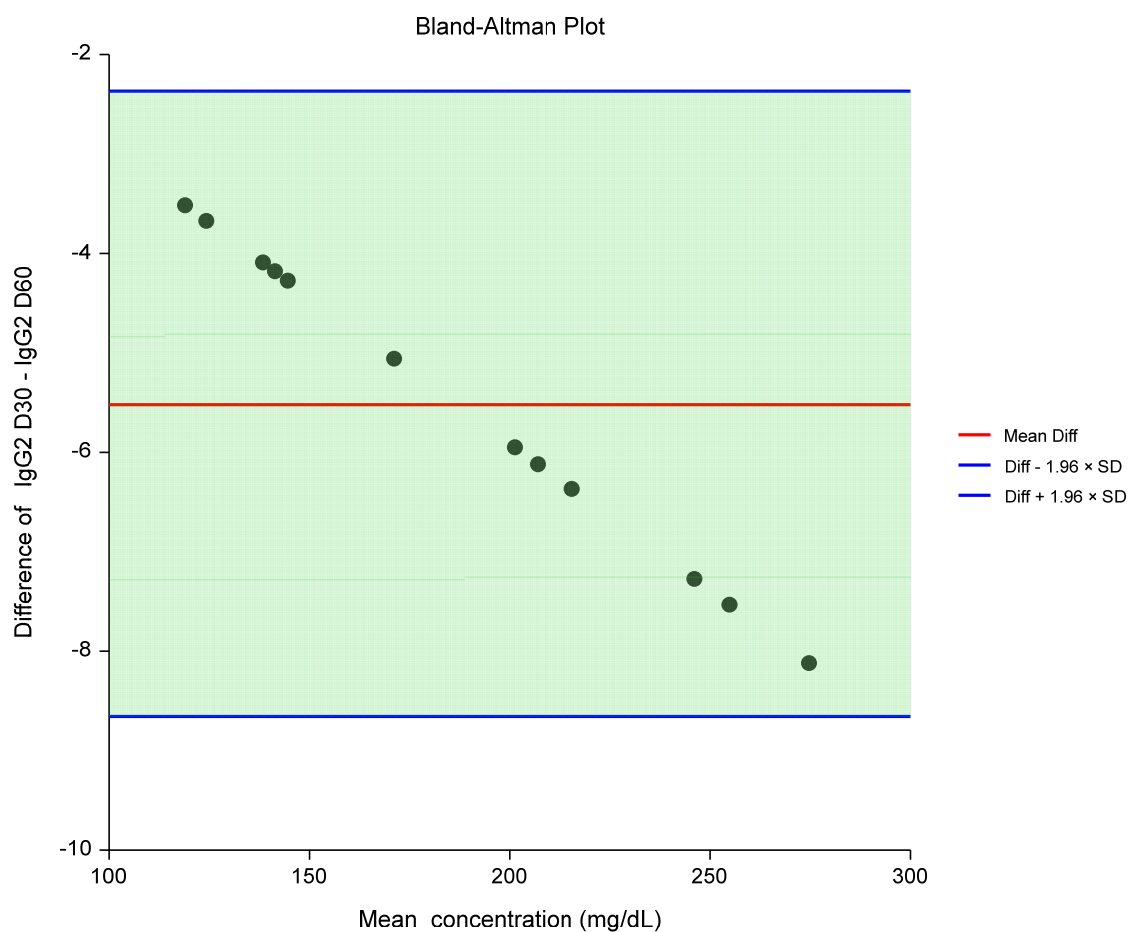

**Figure S11.** Bland-Altman plot of concentration of IgG2 for Day 30 and Day 60 in placebo crossed over to test group.

**Table S11.** Bias and Limits of Agreement of concentration of IgG2 for Day 30 and Day 60 in placebo crossed over to test group.

| Parameter                | Count | Value | Standard Deviation | 95.0% LCL of Value | 95.0% UCL of Value |
|--------------------------|-------|-------|--------------------|--------------------|--------------------|
| Bias (Difference)        | 12    | -5.51 | 1.60               | -6.53              | -4.50              |
| Lower Limit of Agreement | 12    | -8.65 | 0.81               | -10.44             | -6.86              |
| Upper Limit of Agreement | 12    | -2.37 | 0.81               | -4.16              | -0.59              |

Limits of Agreement = Difference  $\pm$  1.96  $\times$  (Standard Deviation of Difference).

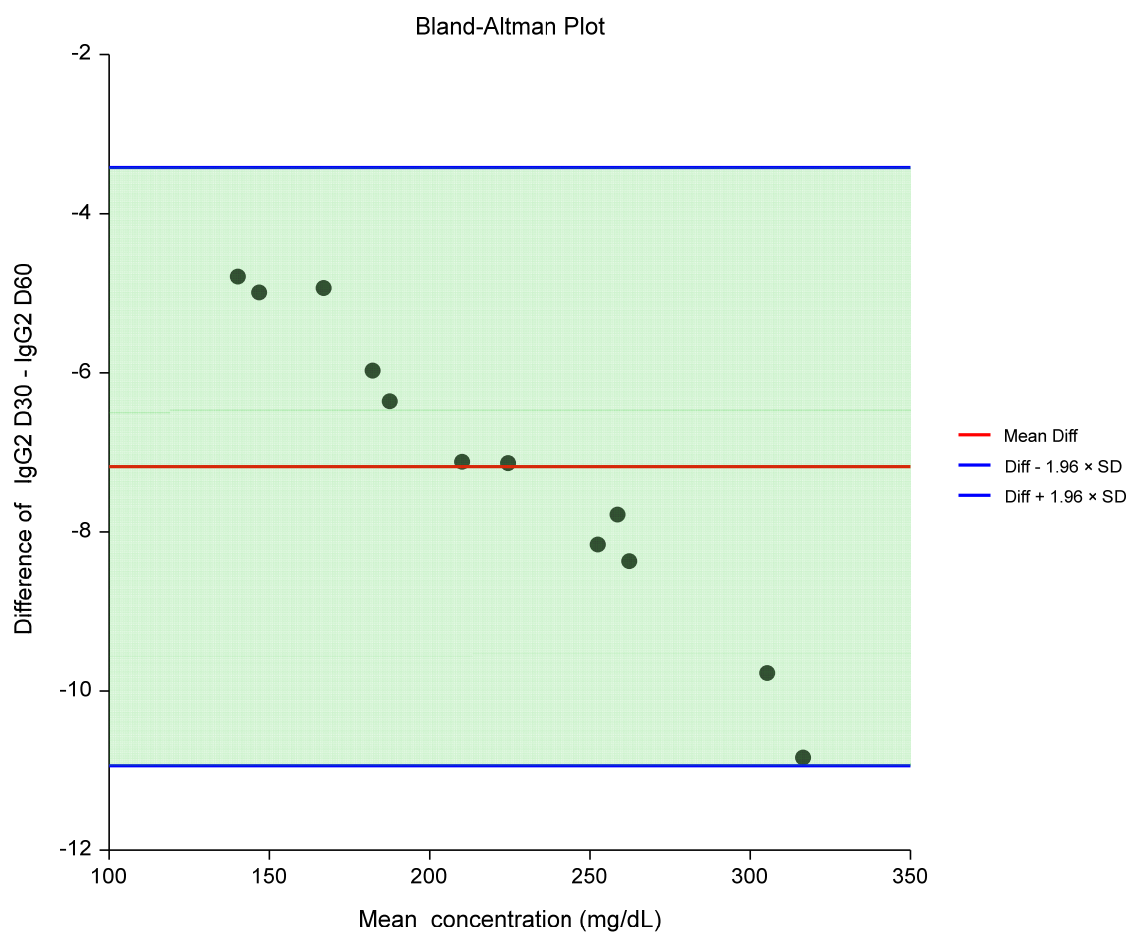

**Figure S12.** Bland-Altman plot of concentration of IgG2 for Day 30 and Day 60 in test group.

**Table S12.** Bias and Limits of Agreement of concentration of IgG2 for Day 30 and Day 60 in test group.

| Parameter                | Count | Value  | Standard Deviation | 95.0% LCL of Value | 95.0% UCL of Value |
|--------------------------|-------|--------|--------------------|--------------------|--------------------|
| Bias (Difference)        | 12    | -7.18  | 1.92               | -8.40              | -5.97              |
| Lower Limit of Agreement | 12    | -10.95 | 0.97               | -13.09             | -8.80              |
| Upper Limit of Agreement | 12    | -3.42  | 0.97               | -5.57              | -1.28              |

Limits of Agreement = Difference  $\pm$  1.96  $\times$  (Standard Deviation of Difference).

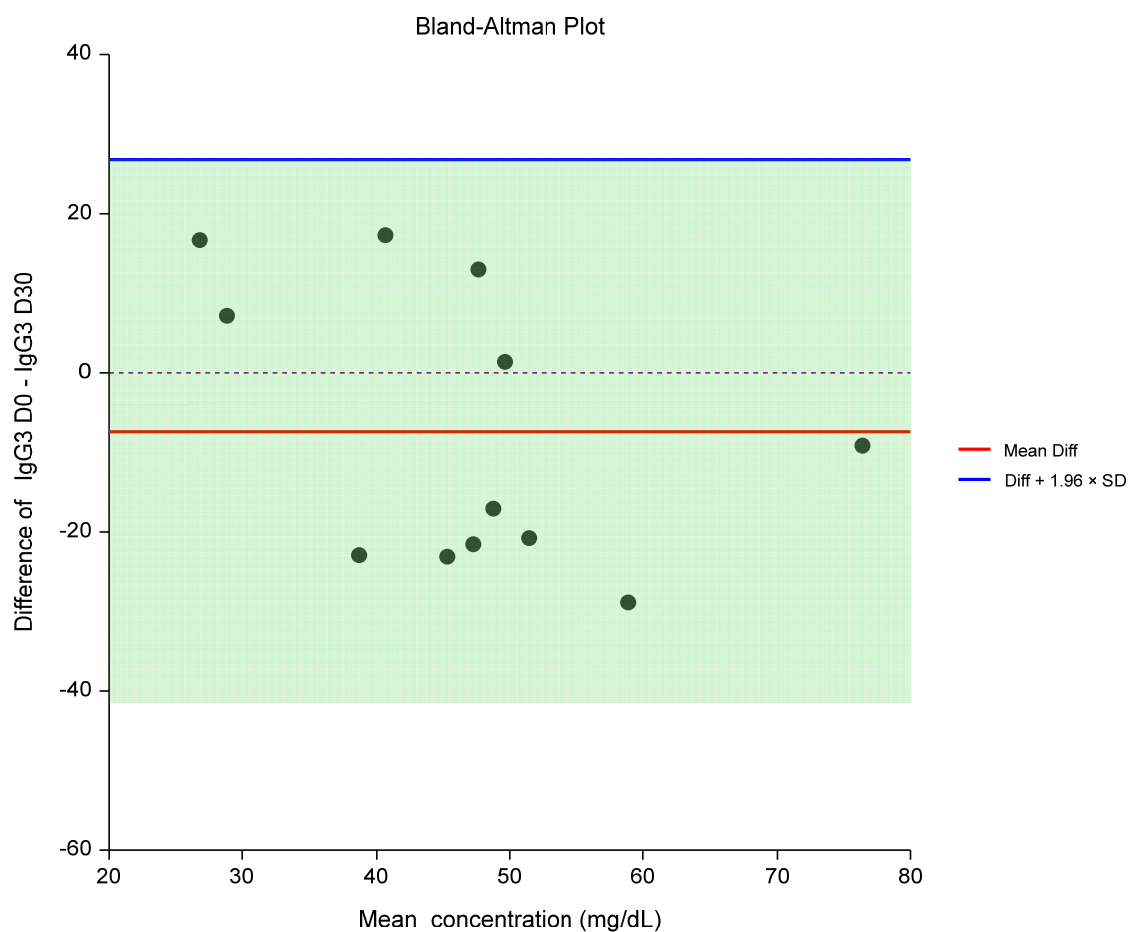

**Figure S13.** Bland-Altman plot of concentration of IgG3 for Day 0 and Day 30 in placebo group.

**Table S13.** Bias and Limits of Agreement of concentration of IgG3 for Day 0 and Day 30 in placebo group.

| Parameter                | Count | Value  | Standard Deviation | 95.0% LCL of Value | 95.0% UCL of Value |
|--------------------------|-------|--------|--------------------|--------------------|--------------------|
| Bias (Difference)        | 12    | -7.33  | 17.37              | -18.37             | 3.71               |
| Lower Limit of Agreement | 12    | -41.37 | 8.82               | -60.79             | -21.96             |
| Upper Limit of Agreement | 12    | 26.71  | 8.82               | 7.30               | 46.13              |

Limits of Agreement = Difference  $\pm$  1.96  $\times$  (Standard Deviation of Difference).

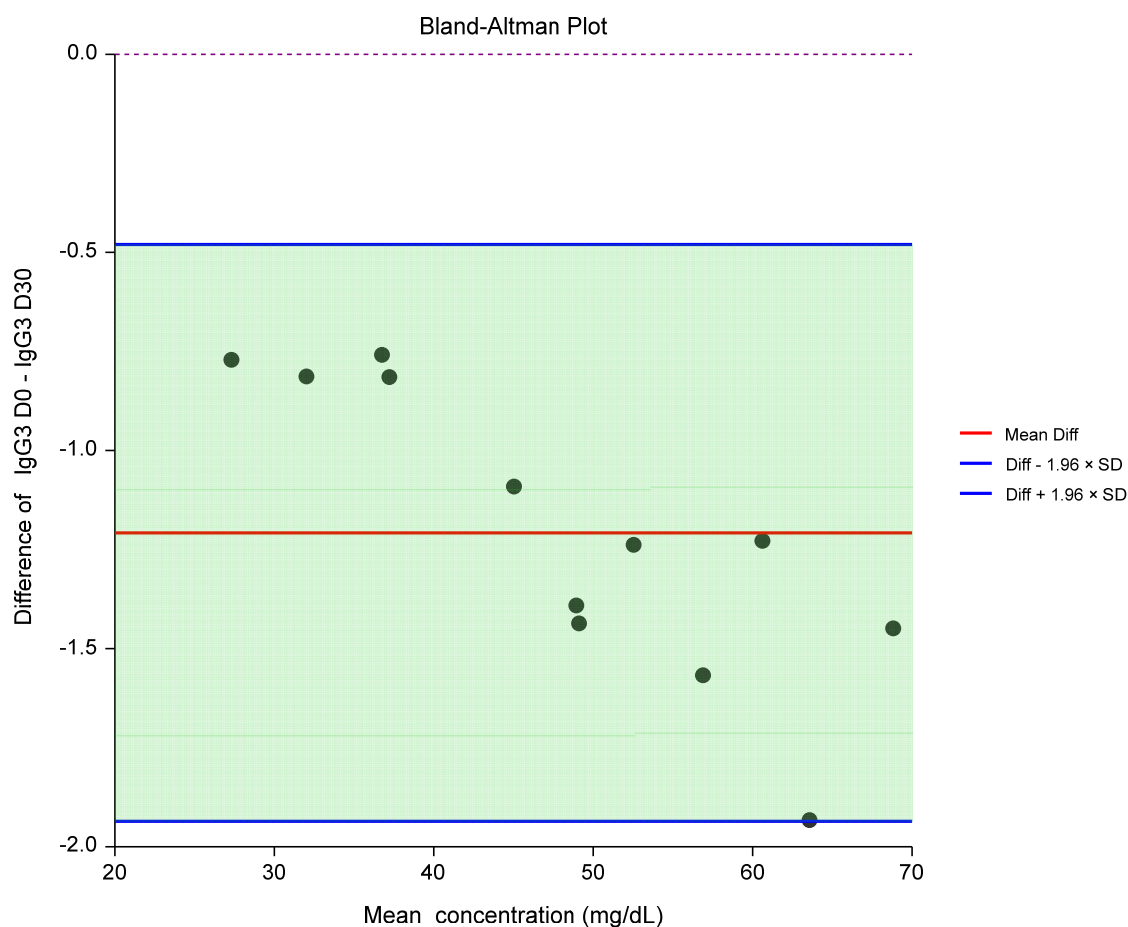

**Figure S14.** Bland-Altman plot of concentration of IgG3 for Day 0 and Day 30 in test group.

**Table S14.** Bias and Limits of Agreement of concentration of IgG3 for Day 0 and Day 30 in test group.

| Parameter                | Count | Value | Standard Deviation | 95.0% LCL of Value | 95.0% UCL of Value |
|--------------------------|-------|-------|--------------------|--------------------|--------------------|
| Bias (Difference)        | 12    | -1.21 | 0.37               | -1.44              | -0.97              |
| Lower Limit of Agreement | 12    | -1.94 | 0.19               | -2.35              | -1.52              |
| Upper Limit of Agreement | 12    | -0.48 | 0.19               | -0.89              | -0.06              |

Limits of Agreement = Difference  $\pm$  1.96  $\times$  (Standard Deviation of Difference).

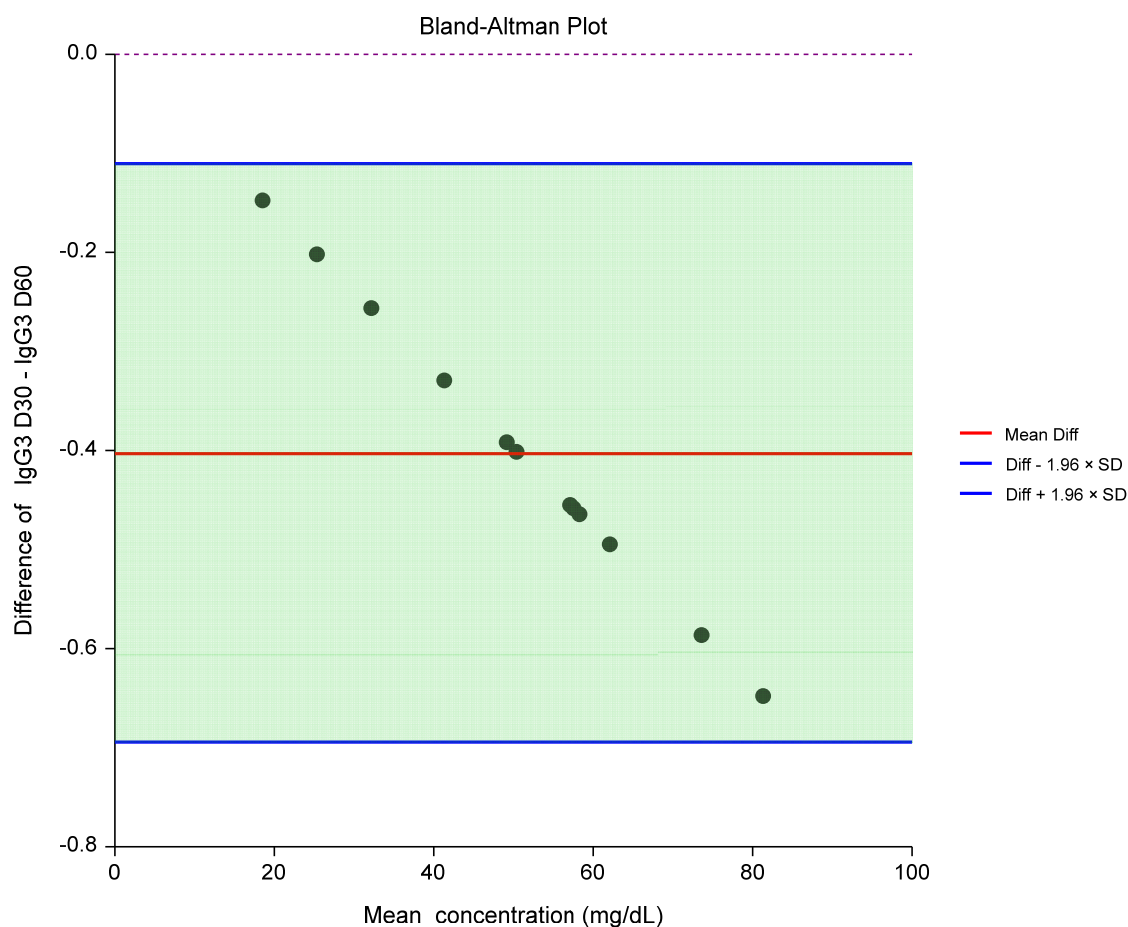

**Figure S15.** Bland-Altman plot of concentration of IgG3 for Day 30 and Day 60 in placebo crossed over to test group.

**Table S15.** Bias and Limits of Agreement of concentration of IgG3 for Day 30 and Day 60 in placebo crossed over to test group.

| Parameter                | Count | Value | Standard Deviation | 95.0% LCL of Value | 95.0% UCL of Value |
|--------------------------|-------|-------|--------------------|--------------------|--------------------|
| Bias (Difference)        | 12    | -0.40 | 0.15               | -0.50              | -0.31              |
| Lower Limit of Agreement | 12    | -0.69 | 0.08               | -0.86              | -0.53              |
| Upper Limit of Agreement | 12    | -0.11 | 0.08               | -0.28              | 0.06               |

Limits of Agreement = Difference  $\pm$  1.96  $\times$  (Standard Deviation of Difference).

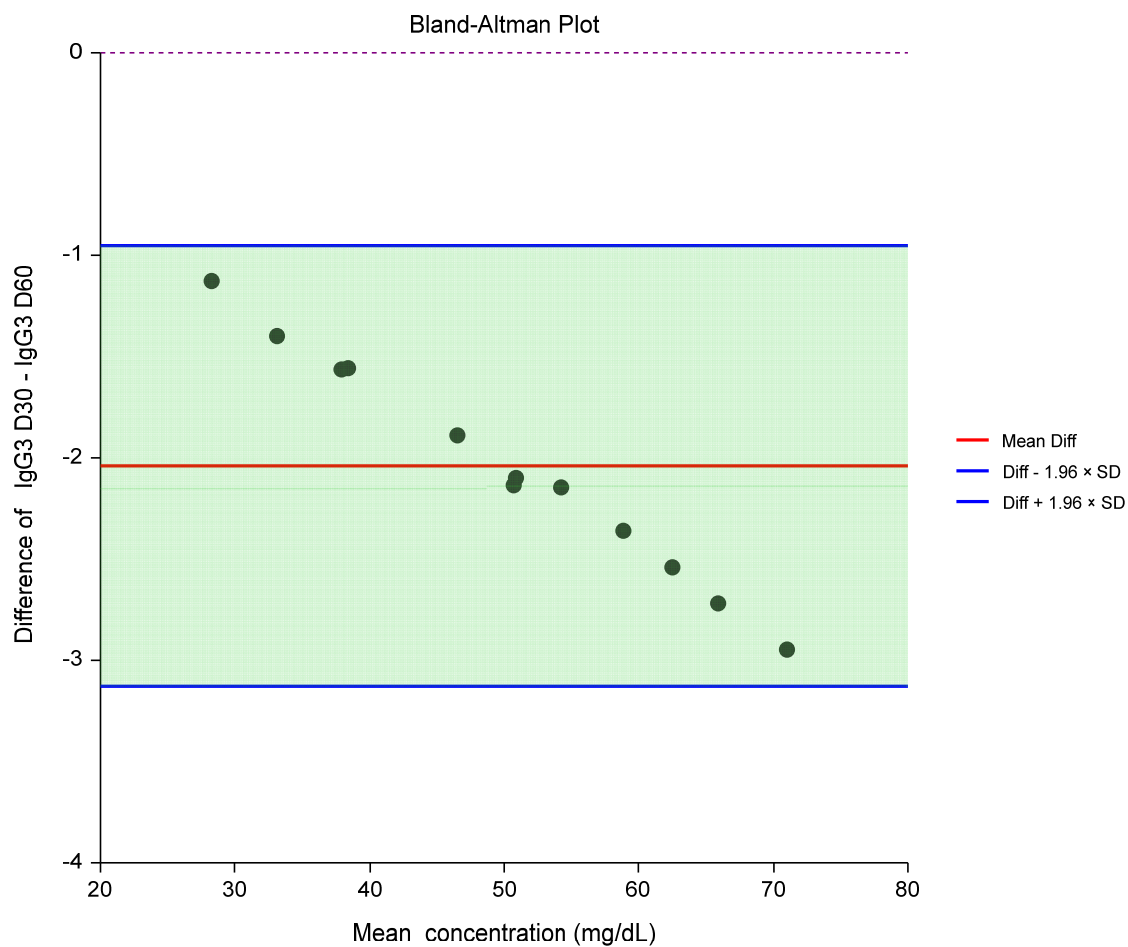

**Figure S16.** Bland-Altman plot of concentration of IgG3 for Day 30 and Day 60 in test group.

**Table S16.** Bias and Limits of Agreement of concentration of IgG3 for Day 30 and Day 60 in test group.

| Parameter                | Count | Value | Standard Deviation | 95.0% LCL of Value | 95.0% UCL of Value |
|--------------------------|-------|-------|--------------------|--------------------|--------------------|
| Bias (Difference)        | 12    | -2.04 | 0.56               | -2.39              | -1.69              |
| Lower Limit of Agreement | 12    | -3.13 | 0.28               | -3.75              | -2.51              |
| Upper Limit of Agreement | 12    | -0.95 | 0.28               | -1.57              | -0.33              |

Limits of Agreement = Difference  $\pm$  1.96  $\times$  (Standard Deviation of Difference).



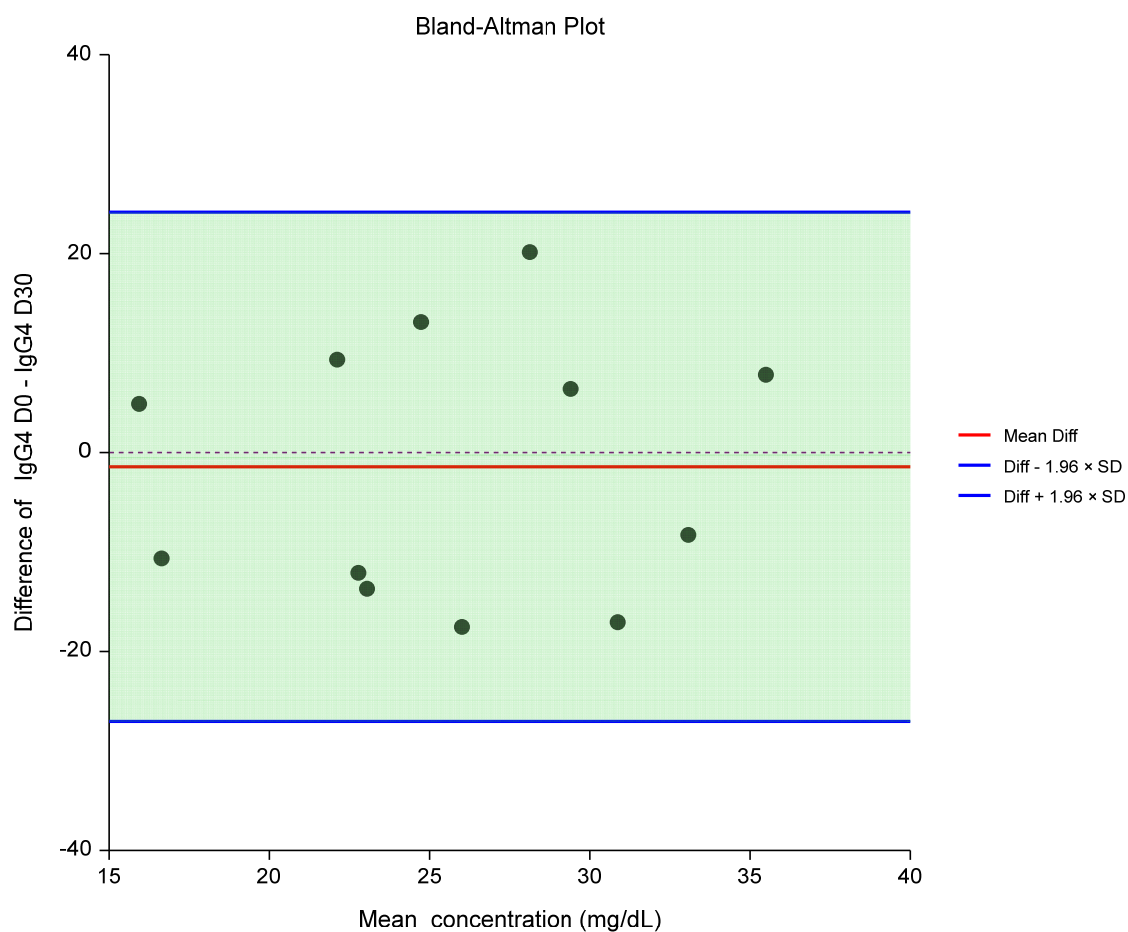

**Figure S17.** Bland-Altman plot of concentration of IgG4 for Day 0 and Day 30 in placebo group.

**Table S17.** Bias and Limits of Agreement of concentration of IgG4 for Day 0 and Day 30 in placebo group.

| Parameter                | Count | Value  | Standard Deviation | 95.0% LCL of Value | 95.0% UCL of Value |
|--------------------------|-------|--------|--------------------|--------------------|--------------------|
| Bias (Difference)        | 12    | -1.47  | 13.07              | -9.78              | 6.83               |
| Lower Limit of Agreement | 12    | -27.09 | 6.64               | -41.71             | -12.48             |
| Upper Limit of Agreement | 12    | 24.15  | 6.64               | 9.54               | 38.76              |

Limits of Agreement = Difference  $\pm$  1.96  $\times$  (Standard Deviation of Difference).

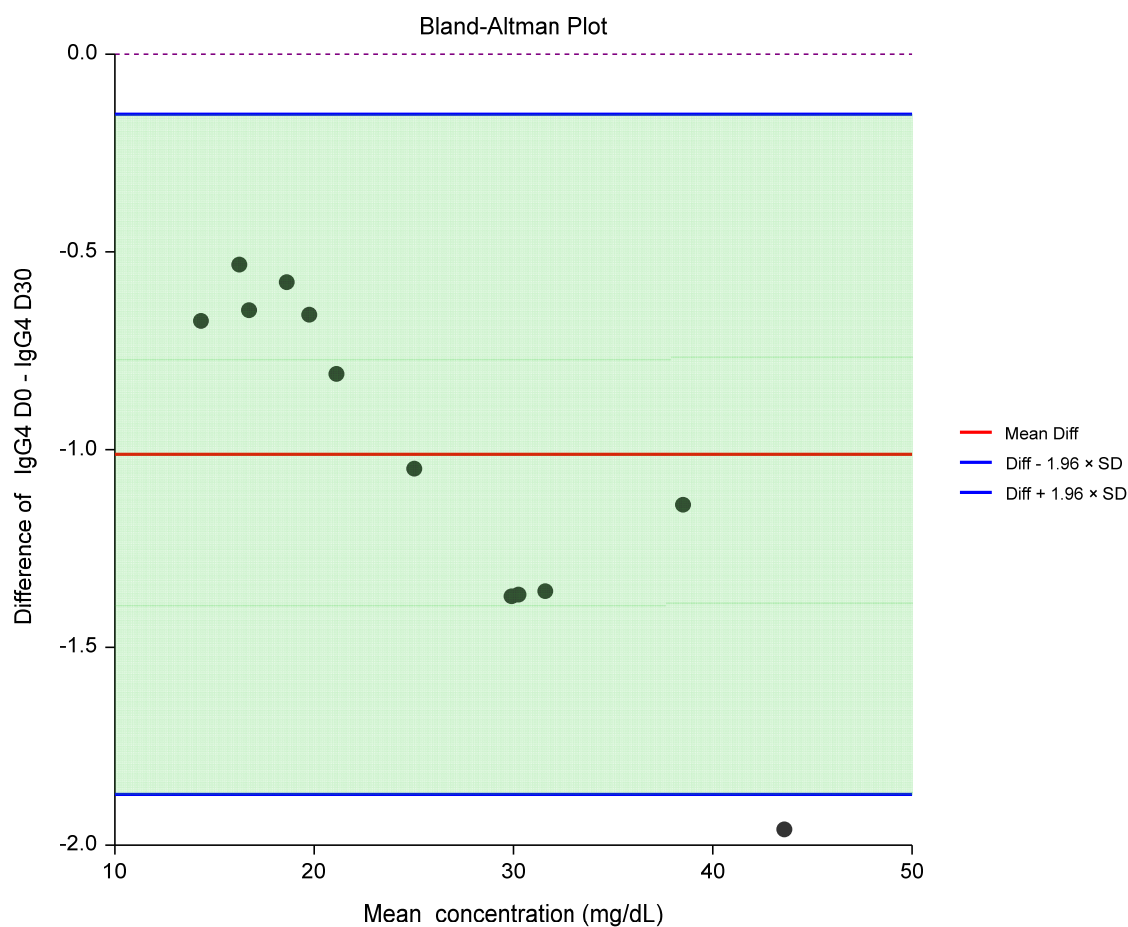

**Figure S18.** Bland-Altman plot of concentration of IgG4 for Day 0 and Day 30 in test group.

**Table S18.** Bias and Limits of Agreement of concentration of IgG4 for Day 0 and Day 30 in test group.

| Parameter                | Count | Value | Standard Deviation | 95.0% LCL of Value | 95.0% UCL of Value |
|--------------------------|-------|-------|--------------------|--------------------|--------------------|
| Bias (Difference)        | 12    | -1.01 | 0.44               | -1.29              | -0.73              |
| Lower Limit of Agreement | 12    | -1.87 | 0.22               | -2.36              | -1.38              |
| Upper Limit of Agreement | 12    | -0.15 | 0.22               | -0.64              | 0.34               |

Limits of Agreement = Difference  $\pm$  1.96  $\times$  (Standard Deviation of Difference).

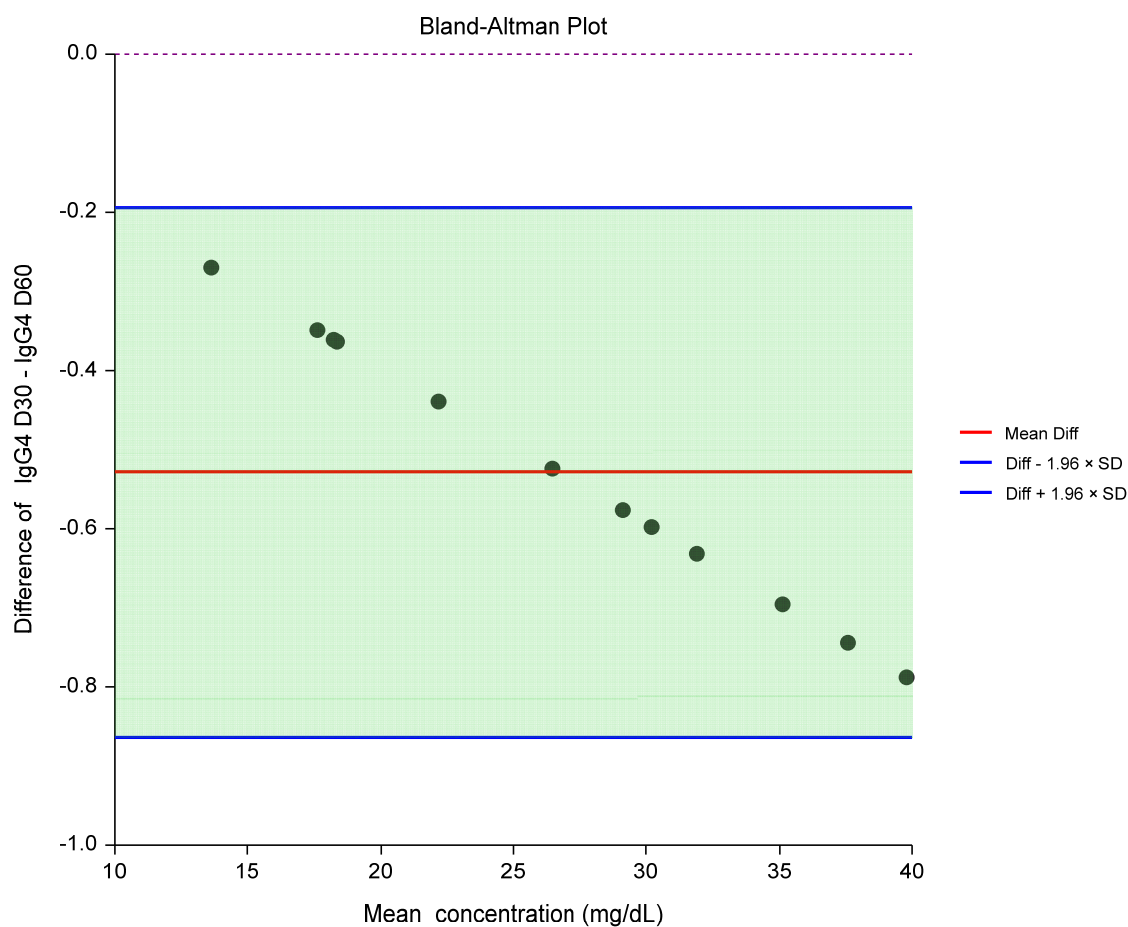

**Figure S19.** Bland-Altman plot of concentration of IgG4 for Day 30 and Day 60 in placebo crossed over to test group.

**Table S19.** Bias and Limits of Agreement of concentration of IgG4 for Day 30 and Day 60 in placebo crossed over to test group.

| Parameter                | Count | Value | Standard Deviation | 95.0% LCL of Value | 95.0% UCL of Value |
|--------------------------|-------|-------|--------------------|--------------------|--------------------|
| Bias (Difference)        | 12    | -0.53 | 0.17               | -0.64              | -0.42              |
| Lower Limit of Agreement | 12    | -0.86 | 0.09               | -1.05              | -0.67              |
| Upper Limit of Agreement | 12    | -0.19 | 0.09               | -0.38              | 0.00               |

Limits of Agreement = Difference  $\pm$  1.96  $\times$  (Standard Deviation of Difference).

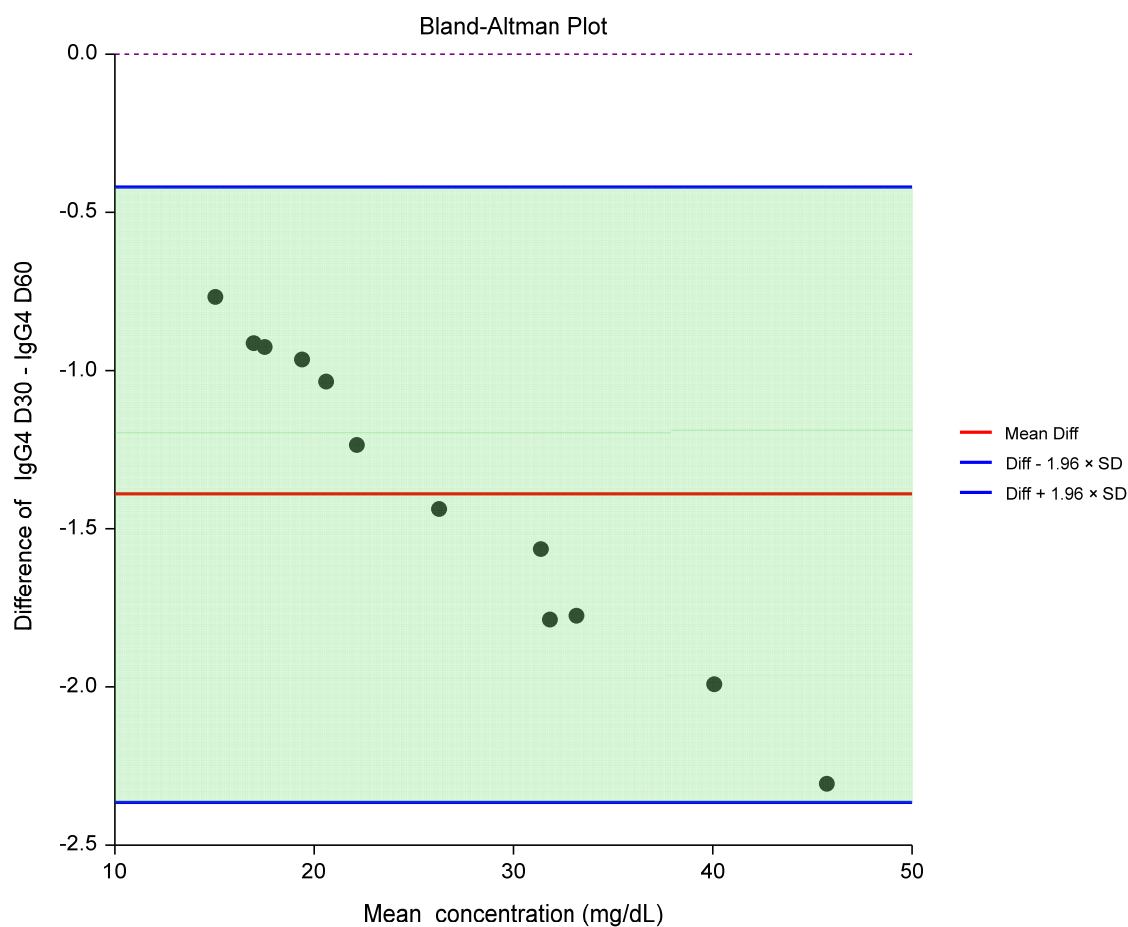

**Figure S20.** Bland-Altman plot of concentration of IgG4 for Day 30 and Day 60 in test group.

**Table S20.** Bias and Limits of Agreement of concentration of IgG4 for Day 30 and Day 60 in test group.

| Parameter                | Count | Value | Standard Deviation | 95.0% LCL of Value | 95.0% UCL of Value |
|--------------------------|-------|-------|--------------------|--------------------|--------------------|
| Bias (Difference)        | 12    | -1.39 | 0.50               | -1.71              | -1.08              |
| Lower Limit of Agreement | 12    | -2.36 | 0.25               | -2.92              | -1.81              |
| Upper Limit of Agreement | 12    | -0.42 | 0.25               | -0.97              | 0.13               |

Limits of Agreement = Difference  $\pm$  1.96  $\times$  (Standard Deviation of Difference).

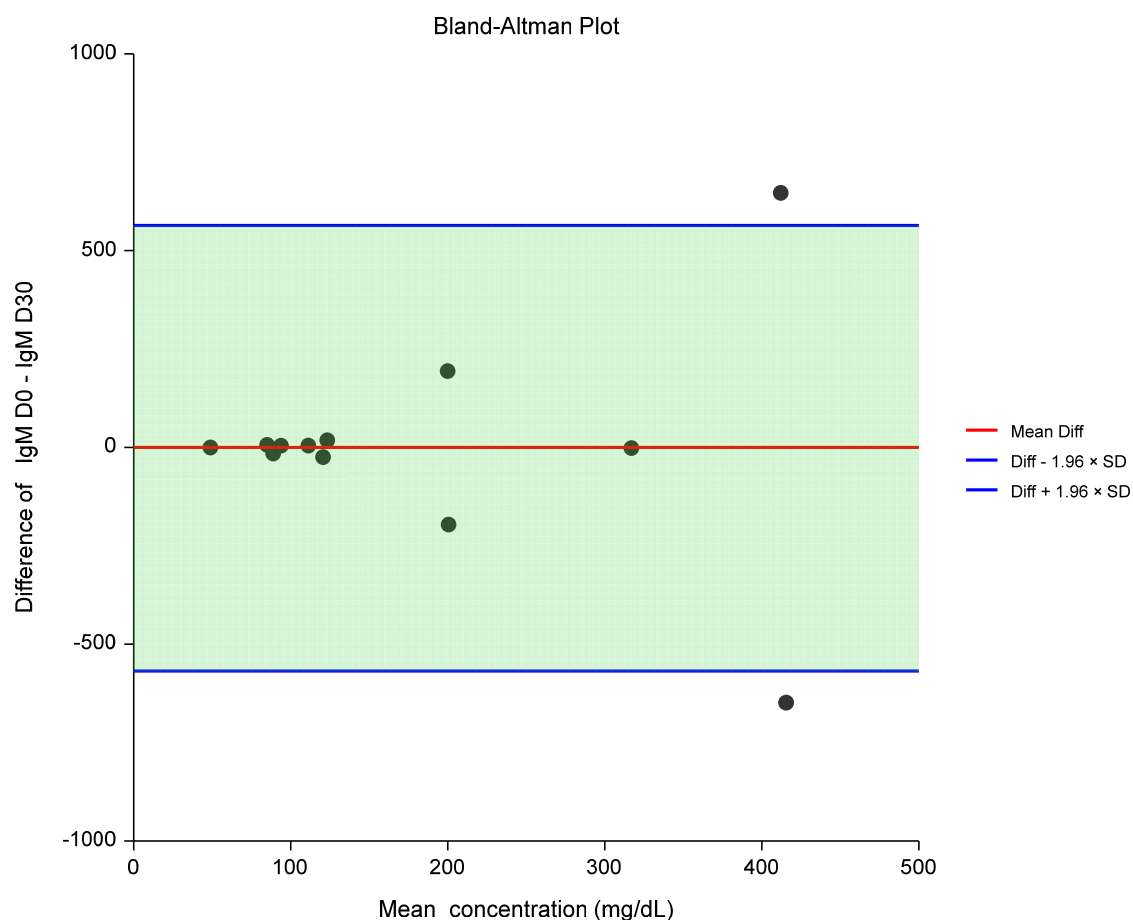

**Figure S21.** Bland-Altman plot of concentration of IgM for Day 0 and Day 30 in placebo group.

**Table S21.** Bias and Limits of Agreement of concentration of IgM for Day 0 and Day 30 in placebo group.

| Parameter                | Count | Value   | Standard Deviation | 95.0% LCL of Value | 95.0% UCL of Value |
|--------------------------|-------|---------|--------------------|--------------------|--------------------|
| Bias (Difference)        | 12    | -1.03   | 288.58             | -184.39            | 182.33             |
| Lower Limit of Agreement | 12    | -566.65 | 146.57             | -889.25            | -244.06            |
| Upper Limit of Agreement | 12    | 564.59  | 146.57             | 242.00             | 887.19             |

Limits of Agreement = Difference  $\pm$  1.96  $\times$  (Standard Deviation of Difference).

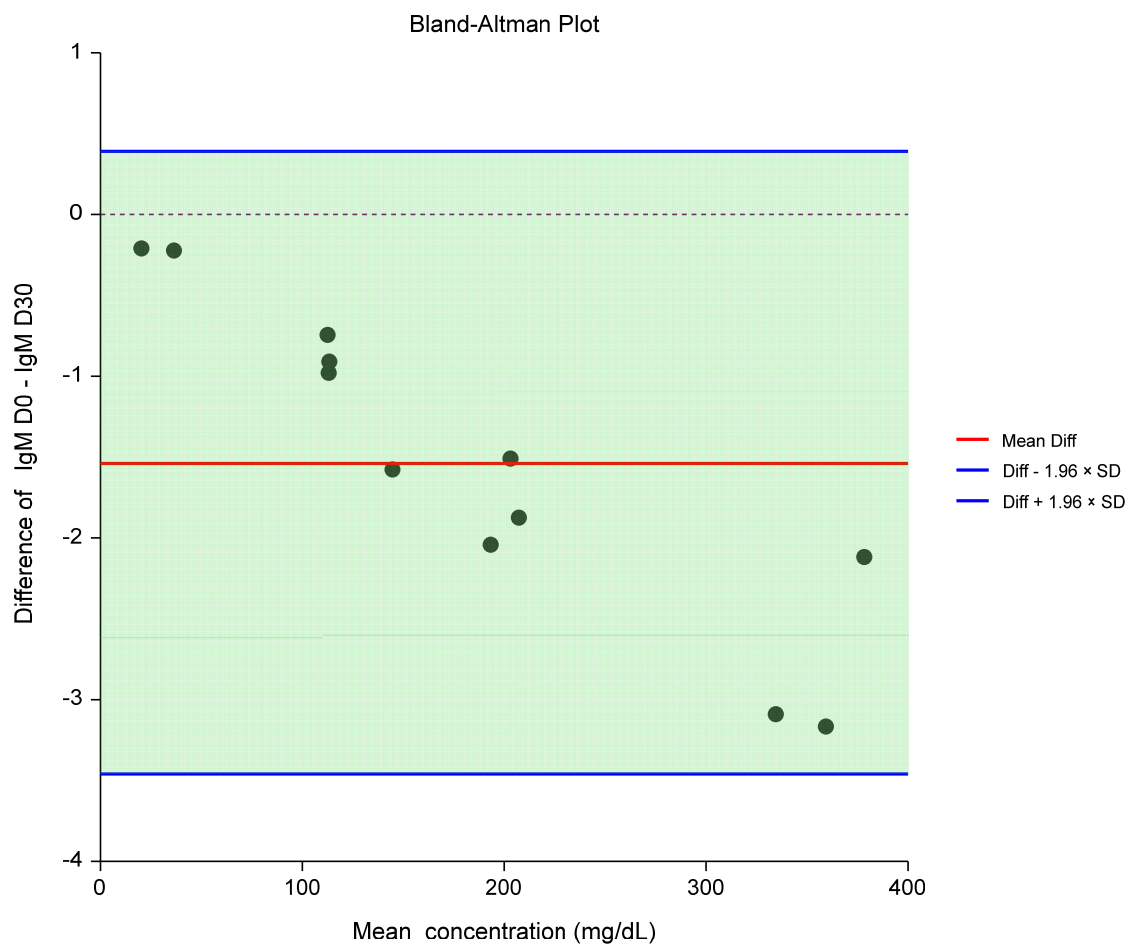

**Figure S22.** Bland-Altman plot of concentration of IgM for Day 0 and Day 30 in test group.

**Table S22.** Bias and Limits of Agreement of concentration of IgM for Day 0 and Day 30 in test group.

| Parameter                | Count | Value | Standard Deviation | 95.0% LCL of Value | 95.0% UCL of Value |
|--------------------------|-------|-------|--------------------|--------------------|--------------------|
| Bias (Difference)        | 12    | -1.54 | 0.98               | -2.16              | -0.91              |
| Lower Limit of Agreement | 12    | -3.46 | 0.50               | -4.56              | -2.36              |
| Upper Limit of Agreement | 12    | 0.39  | 0.50               | -0.71              | 1.48               |

Limits of Agreement = Difference  $\pm$  1.96  $\times$  (Standard Deviation of Difference).

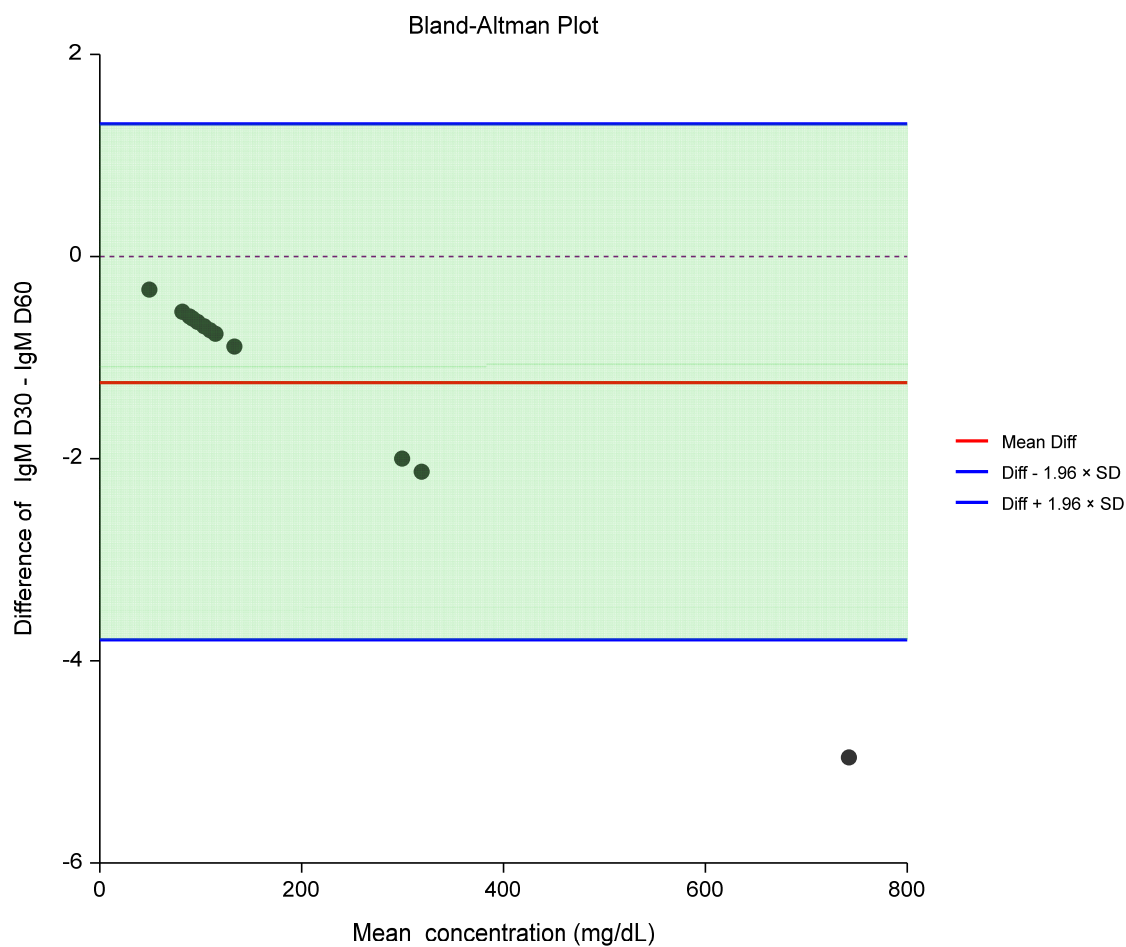

**Figure S23.** Bland-Altman plot of concentration of IgM for Day 30 and Day 60 in placebo crossed over to test group.

**Table S23.** Bias and Limits of Agreement of concentration of IgM for Day 30 and Day 60 in placebo crossed over to test group.

| Parameter                | Count | Value | Standard Deviation | 95.0% LCL of Value | 95.0% UCL of Value |
|--------------------------|-------|-------|--------------------|--------------------|--------------------|
| Bias (Difference)        | 12    | -1.24 | 1.30               | -2.07              | -0.42              |
| Lower Limit of Agreement | 12    | -3.79 | 0.66               | -5.24              | -2.33              |
| Upper Limit of Agreement | 12    | 1.31  | 0.66               | -0.15              | 2.76               |

Limits of Agreement = Difference  $\pm$  1.96  $\times$  (Standard Deviation of Difference).

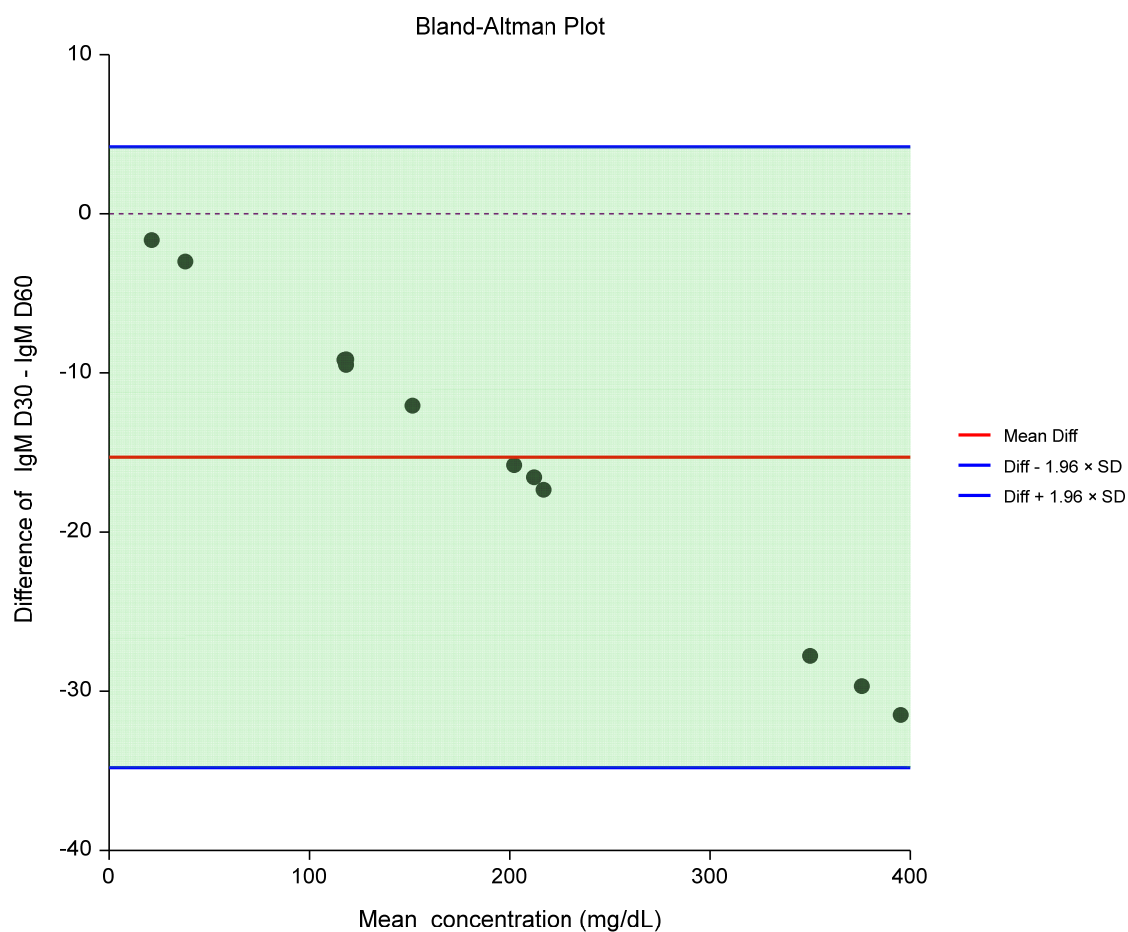

**Figure S24.** Bland-Altman plot of concentration of IgM for Day 30 and Day 60 in test group.

**Table S24.** Bias and Limits of Agreement of concentration of IgM for Day 30 and Day 60 in test group.

| Parameter                | Count | Value  | Standard Deviation | 95.0% LCL of Value | 95.0% UCL of Value |
|--------------------------|-------|--------|--------------------|--------------------|--------------------|
| Bias (Difference)        | 12    | -15.27 | 9.94               | -21.58             | -8.95              |
| Lower Limit of Agreement | 12    | -34.75 | 5.05               | -45.87             | -23.64             |
| Upper Limit of Agreement | 12    | 4.22   | 5.05               | -6.89              | 15.34              |

Limits of Agreement = Difference  $\pm$  1.96  $\times$  (Standard Deviation of Difference).
