# Supplementary material for: Immunomodulatory Effect of Withania somnifera (Ashwagandha) Extract—A Randomized, Double-Blind, Placebo Controlled Trial with an Open Label Extension on Healthy Participants
Source: MDPI journal article supplement (doi:10.3390/jcm10163644), 2021-08-18
Supplement: s1 [file s1]

# Supplementary file 3. Bland-Altman Analysis of Cytokines

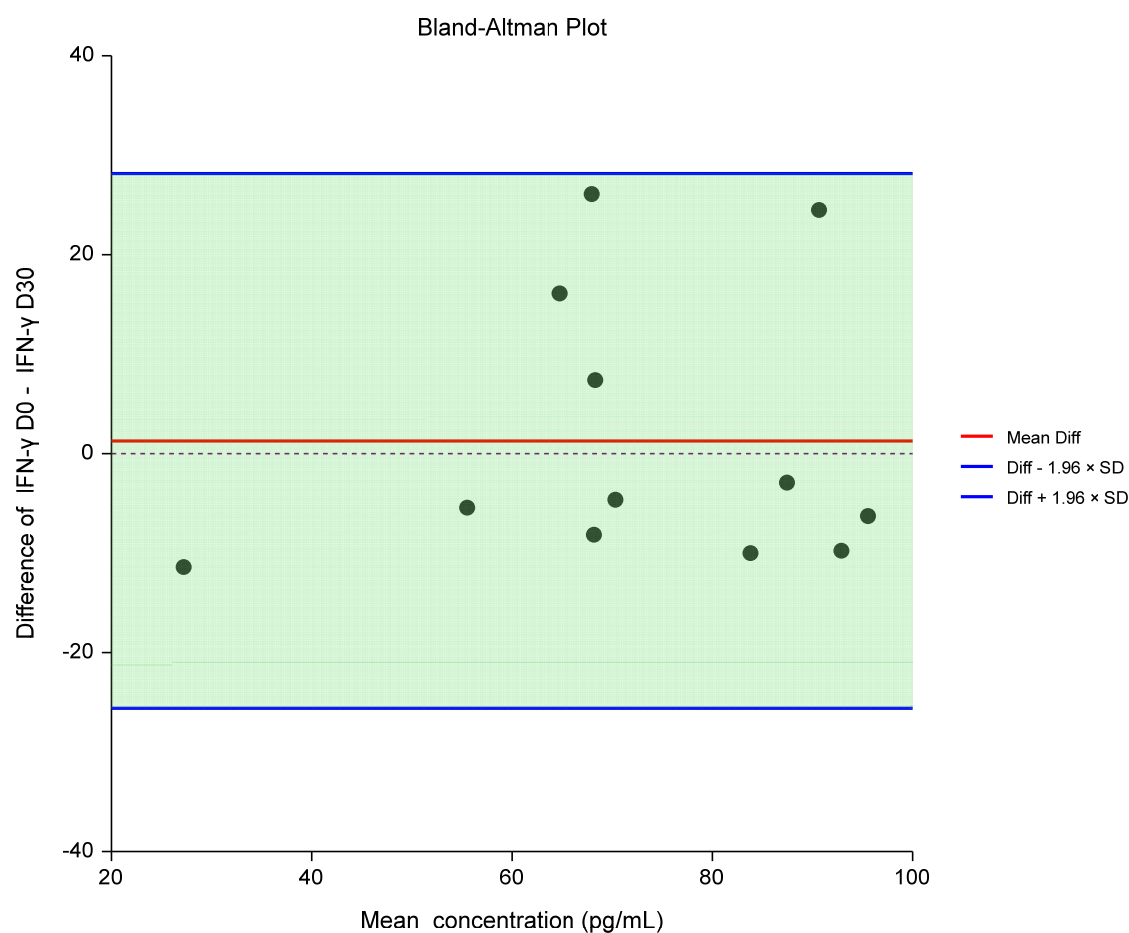

**Figure S1.** Bland-Altman plot of Concentration of IFN-γ for Day 0 and Day 30 in placebo group.

**Table S1.** Bias and Limits of Agreement of Concentration of IFN-γ for Day 0 and Day 30 in placebo group.

| Parameter                | Count | Value  | Standard Deviation | 95.0% LCL of Value | 95.0% UCL of Value |
|--------------------------|-------|--------|--------------------|--------------------|--------------------|
| Bias (Difference)        | 12    | 1.30   | 13.70              | -7.41              | 10.00              |
| Lower Limit of Agreement | 12    | -25.56 | 6.96               | -40.88             | -10.24             |
| Upper Limit of Agreement | 12    | 28.16  | 6.96               | 12.84              | 43.48              |

Limits of Agreement = Difference ± 1.96 × (Standard Deviation of Difference).

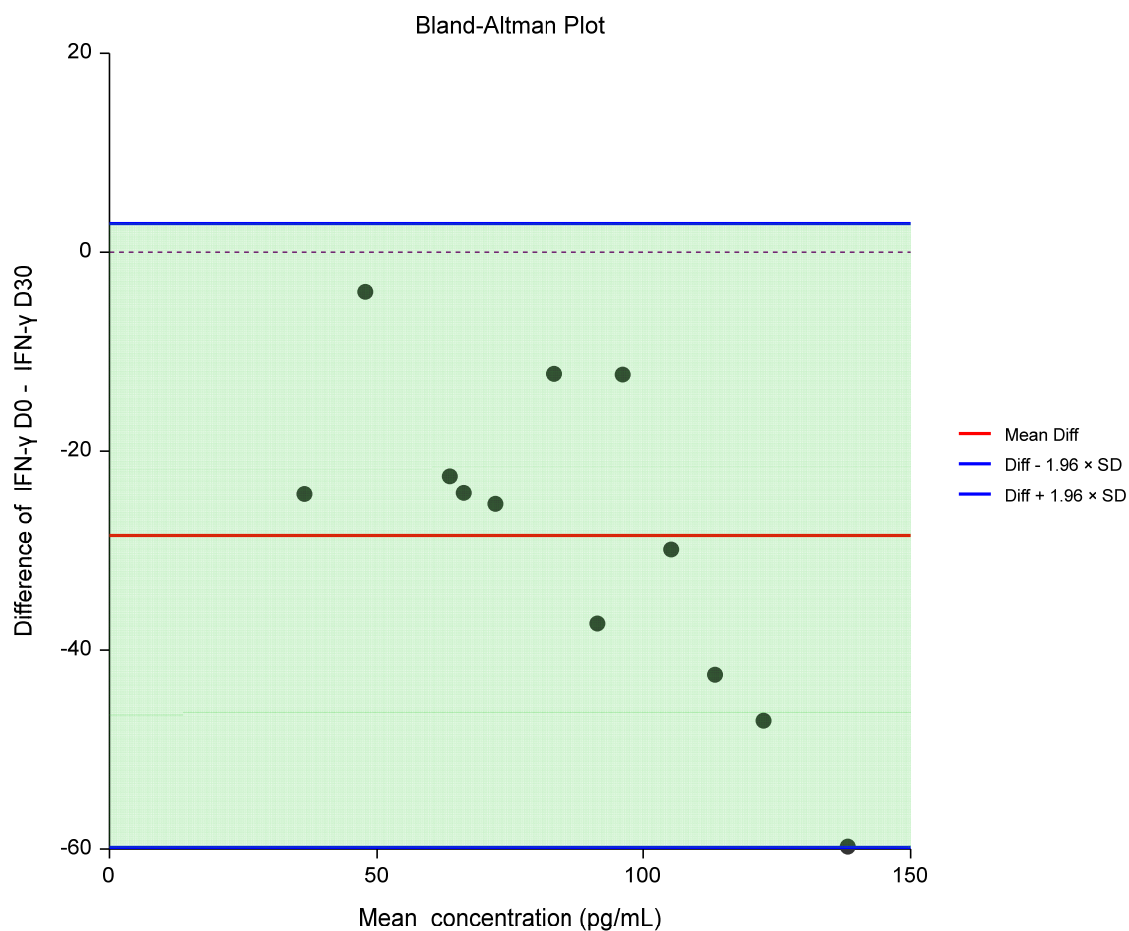

**Figure S2.** Bland-Altman plot of Concentration of IFN- $\gamma$  for Day 0 and Day 30 in test group.

**Table S2.** Bias and Limits of Agreement of Concentration of IFN- $\gamma$  for Day 0 and Day 30 in test group.

| Parameter                | Count | Value  | Standard Deviation | 95.0% LCL of Value | 95.0% UCL of Value |
|--------------------------|-------|--------|--------------------|--------------------|--------------------|
| Bias (Difference)        | 12    | -28.45 | 15.98              | -38.60             | -18.30             |
| Lower Limit of Agreement | 12    | -59.77 | 8.11               | -77.63             | -41.91             |
| Upper Limit of Agreement | 12    | 2.86   | 8.11               | -15.00             | 20.72              |

Limits of Agreement = Difference  $\pm$  1.96  $\times$  (Standard Deviation of Difference).

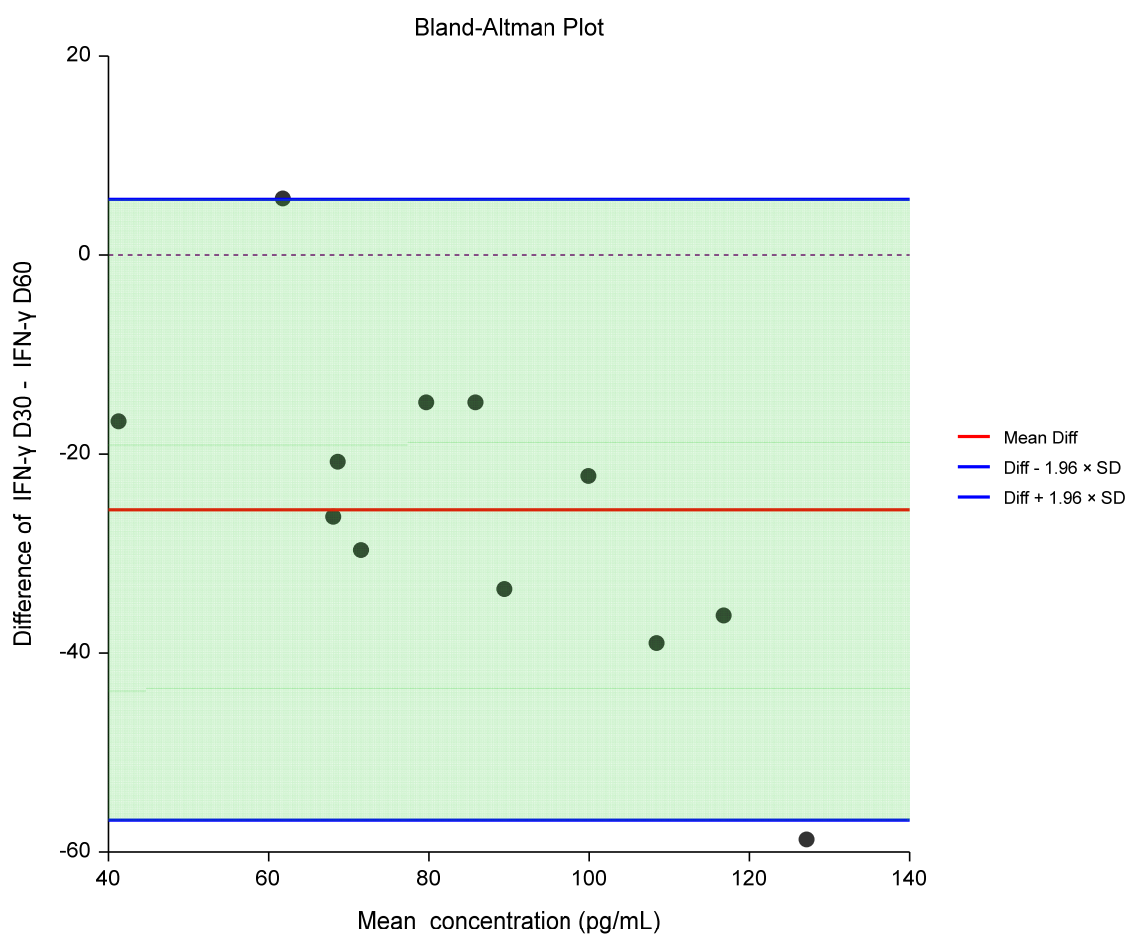

**Figure S3.** Bland-Altman plot of Concentration of IFN- $\gamma$  for Day 30 and Day 60 in placebo crossed over to test group.

**Table S3.** Bias and Limits of Agreement of Concentration of IFN- $\gamma$  for Day 30 and Day 60 in placebo crossed over to test group.

| Parameter                | Count | Value  | Standard Deviation | 95.0% LCL of Value | 95.0% UCL of Value |
|--------------------------|-------|--------|--------------------|--------------------|--------------------|
| Bias (Difference)        | 12    | -25.59 | 15.95              | -35.72             | -15.46             |
| Lower Limit of Agreement | 12    | -56.85 | 8.10               | -74.68             | -39.02             |
| Upper Limit of Agreement | 12    | 5.67   | 8.10               | -12.16             | 23.50              |

Limits of Agreement = Difference  $\pm$  1.96  $\times$  (Standard Deviation of Difference).

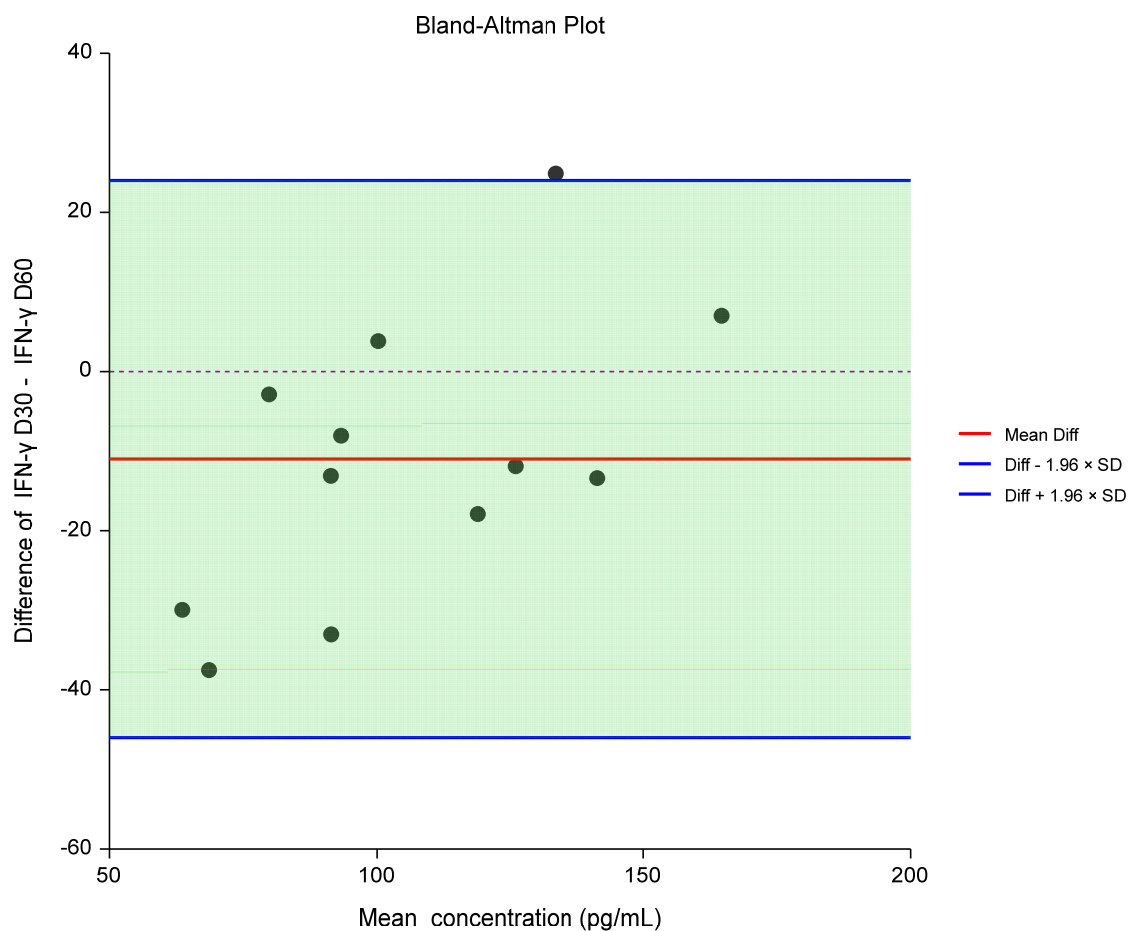

**Figure S4.** Bland-Altman plot of Concentration of IFN- $\gamma$  for Day 30 and Day 60 in test group.

**Table S4.** Bias and Limits of Agreement of Concentration of IFN- $\gamma$  for Day 30 and Day 60 in test group.

| Parameter                | Count | Value  | Standard Deviation | 95.0% LCL of Value | 95.0% UCL of Value |
|--------------------------|-------|--------|--------------------|--------------------|--------------------|
| Bias (Difference)        | 12    | -11.01 | 17.87              | -22.36             | 0.35               |
| Lower Limit of Agreement | 12    | -46.03 | 9.08               | -66.00             | -26.05             |
| Upper Limit of Agreement | 12    | 24.02  | 9.08               | 4.04               | 43.99              |

Limits of Agreement = Difference  $\pm$  1.96  $\times$  (Standard Deviation of Difference).

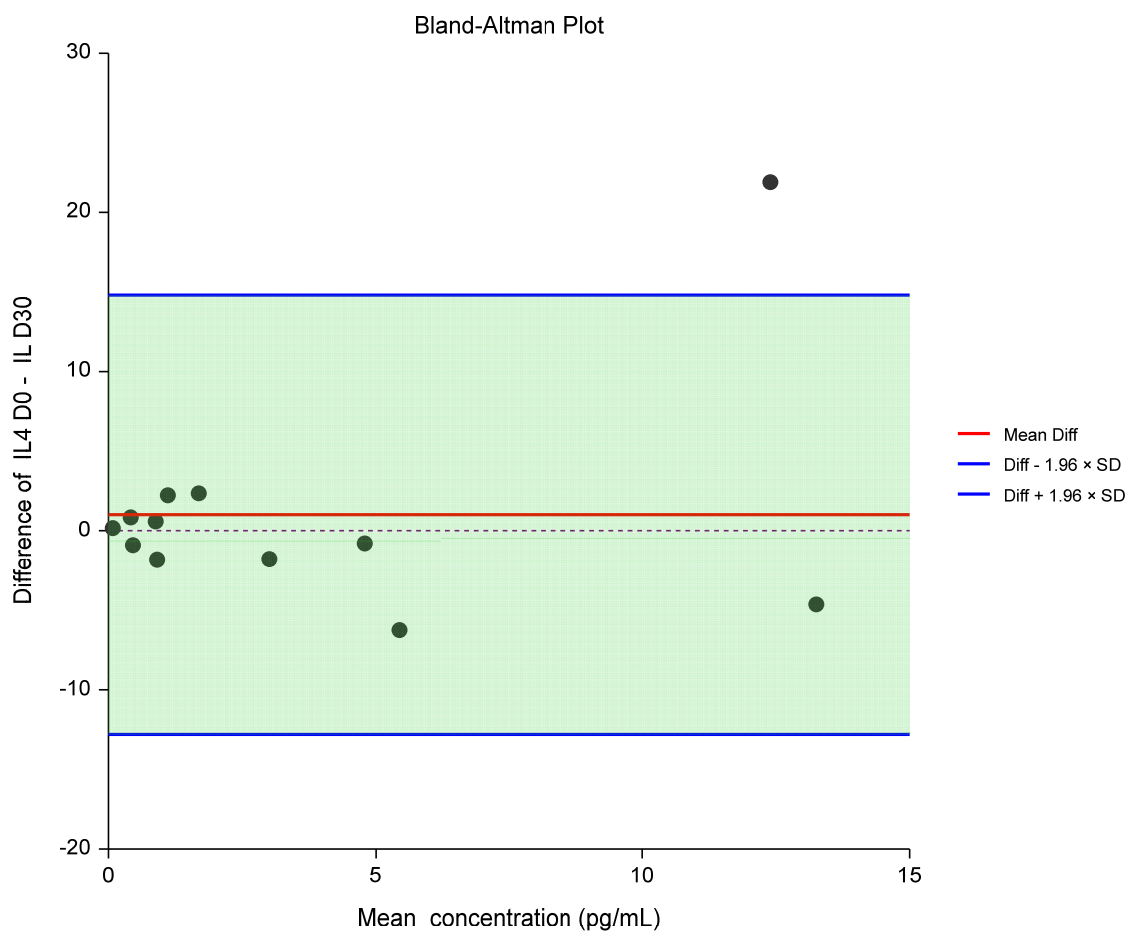

**Figure S5.** Bland-Altman plot of Concentration of IL-4 for Day 0 and Day 30 in placebo group.

**Table S5.** Bias and Limits of Agreement of Concentration of IL-4 for Day 0 and Day 30 in placebo group.

| Parameter                | Count | Value  | Standard Deviation | 95.0% LCL of Value | 95.0% UCL of Value |
|--------------------------|-------|--------|--------------------|--------------------|--------------------|
| Bias (Difference)        | 12    | 0.99   | 7.06               | -3.50              | 5.47               |
| Lower Limit of Agreement | 12    | -12.84 | 3.58               | -20.73             | -4.96              |
| Upper Limit of Agreement | 12    | 14.82  | 3.58               | 6.93               | 22.71              |

Limits of Agreement = Difference  $\pm$  1.96  $\times$  (Standard Deviation of Difference).

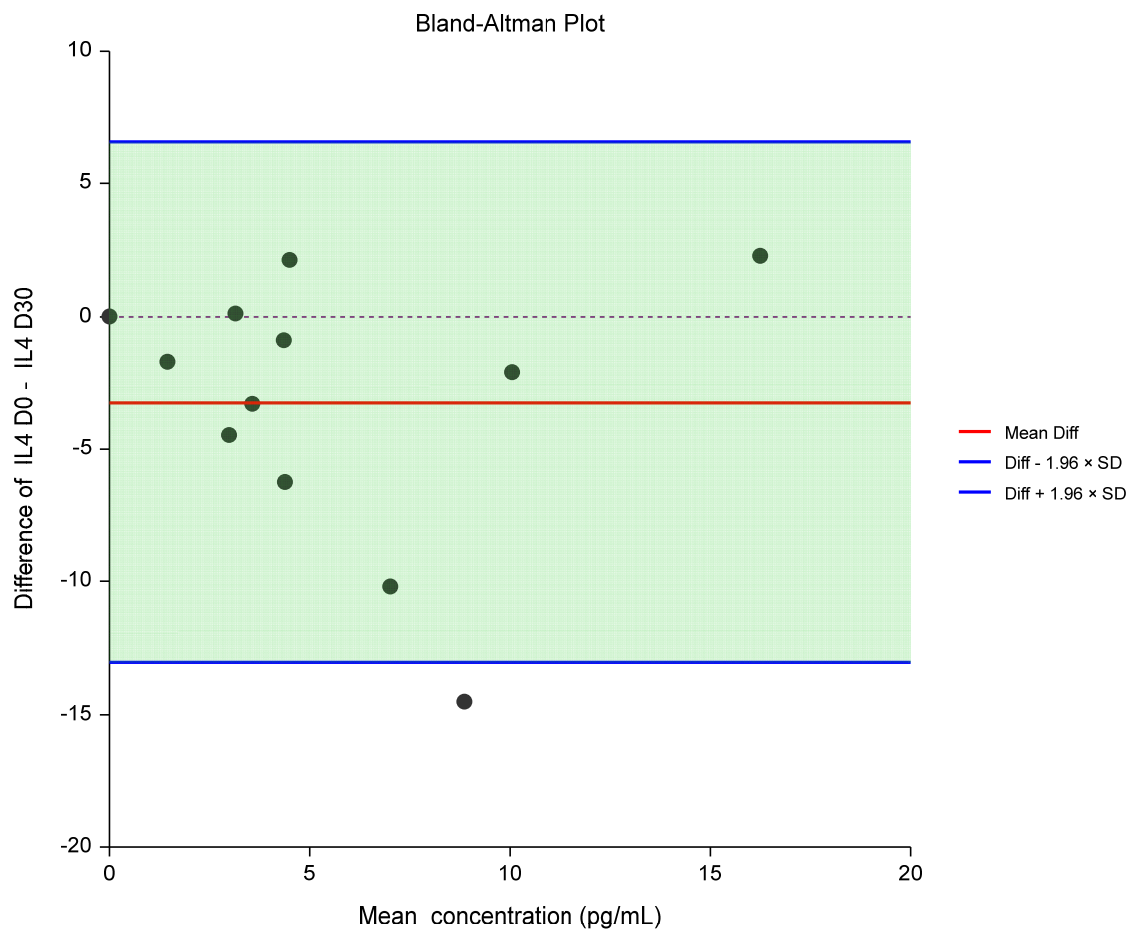

**Figure S6.** Bland-Altman plot of Concentration of IL-4 for Day 0 and Day 30 in test group.

**Table S6.** Bias and Limits of Agreement of Concentration of IL-4 for Day 0 and Day 30 in test group.

| Parameter                | Count | Value  | Standard Deviation | 95.0% LCL of Value | 95.0% UCL of Value |
|--------------------------|-------|--------|--------------------|--------------------|--------------------|
| Bias (Difference)        | 12    | -3.24  | 5.01               | -6.42              | -0.06              |
| Lower Limit of Agreement | 12    | -13.06 | 2.55               | -18.66             | -7.46              |
| Upper Limit of Agreement | 12    | 6.58   | 2.55               | 0.98               | 12.18              |

Limits of Agreement = Difference  $\pm$  1.96  $\times$  (Standard Deviation of Difference).

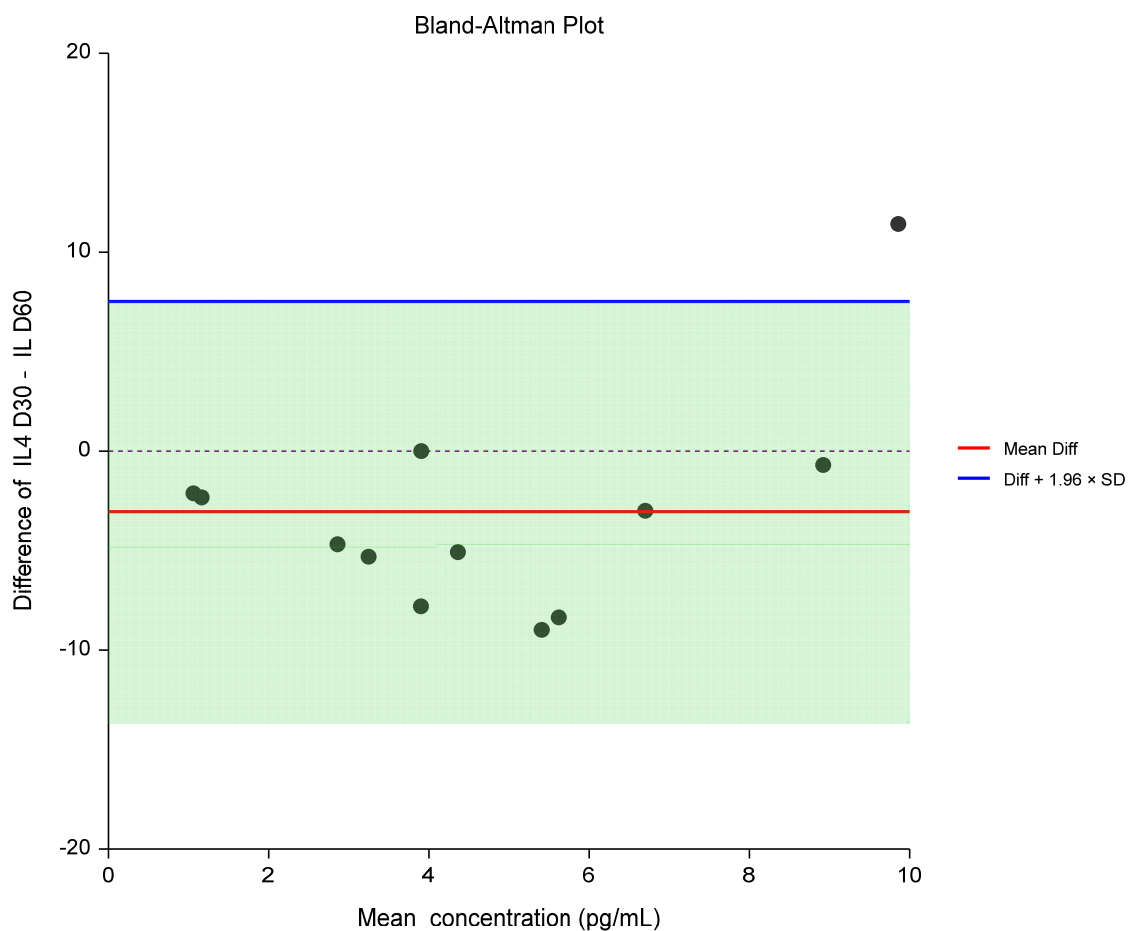

**Figure S7.** Bland-Altman plot of Concentration of IL-4 for Day 30 and Day 60 in placebo crossed over to test group.

**Table S7.** Bias and Limits of Agreement of Concentration of IL-4 for Day 30 and Day 60 in placebo crossed over to test group.

| Parameter                | Count | Value  | Standard Deviation | 95.0% LCL of Value | 95.0% UCL of Value |
|--------------------------|-------|--------|--------------------|--------------------|--------------------|
| Bias (Difference)        | 12    | -3.08  | 5.42               | -6.52              | 0.37               |
| Lower Limit of Agreement | 12    | -13.71 | 2.75               | -19.77             | -7.64              |
| Upper Limit of Agreement | 12    | 7.55   | 2.75               | 1.49               | 13.61              |

Limits of Agreement = Difference  $\pm$  1.96  $\times$  (Standard Deviation of Difference).

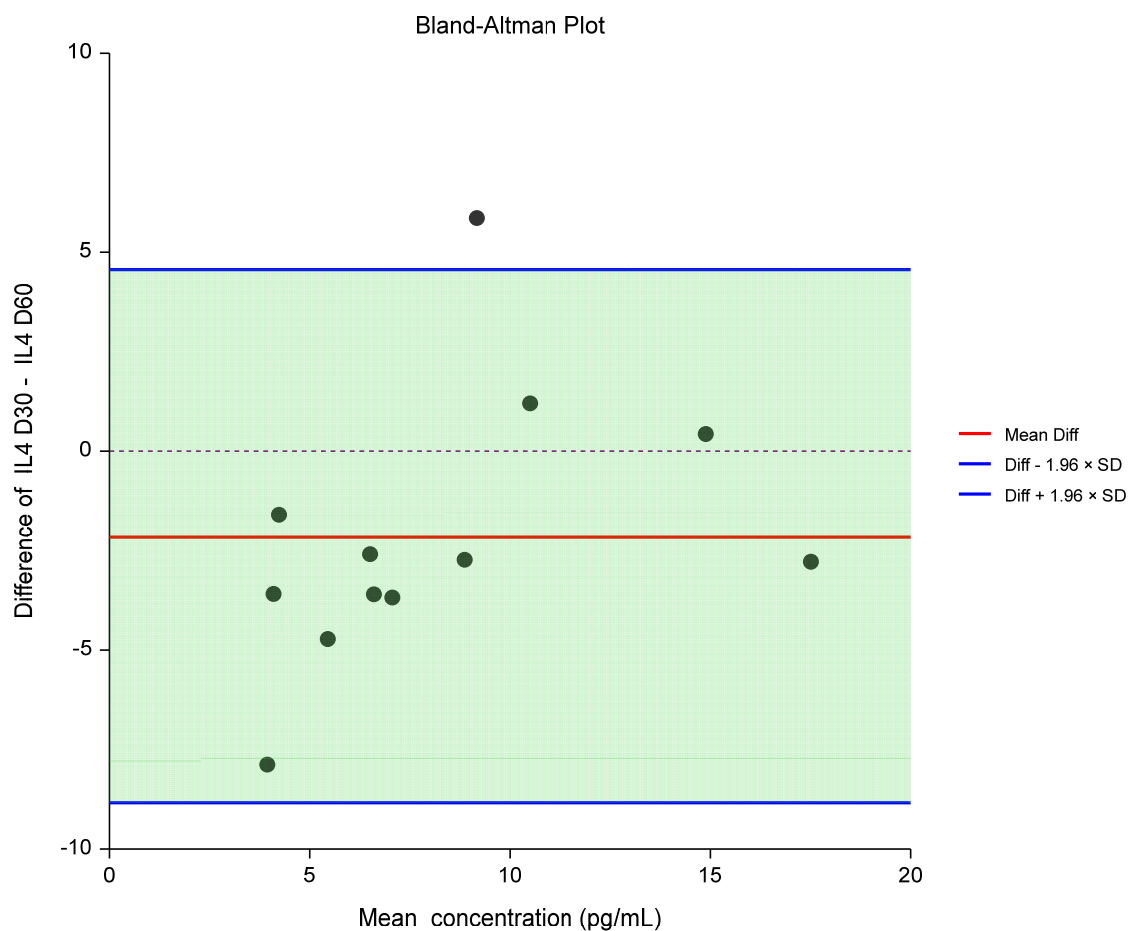

**Figure S8.** Bland-Altman plot of Concentration of IL-4 for Day 30 and Day 60 in test group.

**Table S8.** Bias and Limits of Agreement of Concentration of IL-4 for Day 30 and Day 60 in test group.

| Parameter                | Count | Value | Standard Deviation | 95.0% LCL of Value | 95.0% UCL of Value |
|--------------------------|-------|-------|--------------------|--------------------|--------------------|
| Bias (Difference)        | 12    | -2.14 | 3.43               | -4.32              | 0.04               |
| Lower Limit of Agreement | 12    | -8.86 | 1.74               | -12.69             | -5.03              |
| Upper Limit of Agreement | 12    | 4.58  | 1.74               | 0.75               | 8.41               |

Limits of Agreement = Difference  $\pm$  1.96  $\times$  (Standard Deviation of Difference).
