# Supplementary material for: Immunomodulatory Effect of Withania somnifera (Ashwagandha) Extract—A Randomized, Double-Blind, Placebo Controlled Trial with an Open Label Extension on Healthy Participants
Source: MDPI journal article supplement (doi:10.3390/jcm10163644), 2021-08-18
Supplement: s1 [file s1]

# Supplementary file 4. Bland-Altman Analysis of T cells, B cells and NK cells

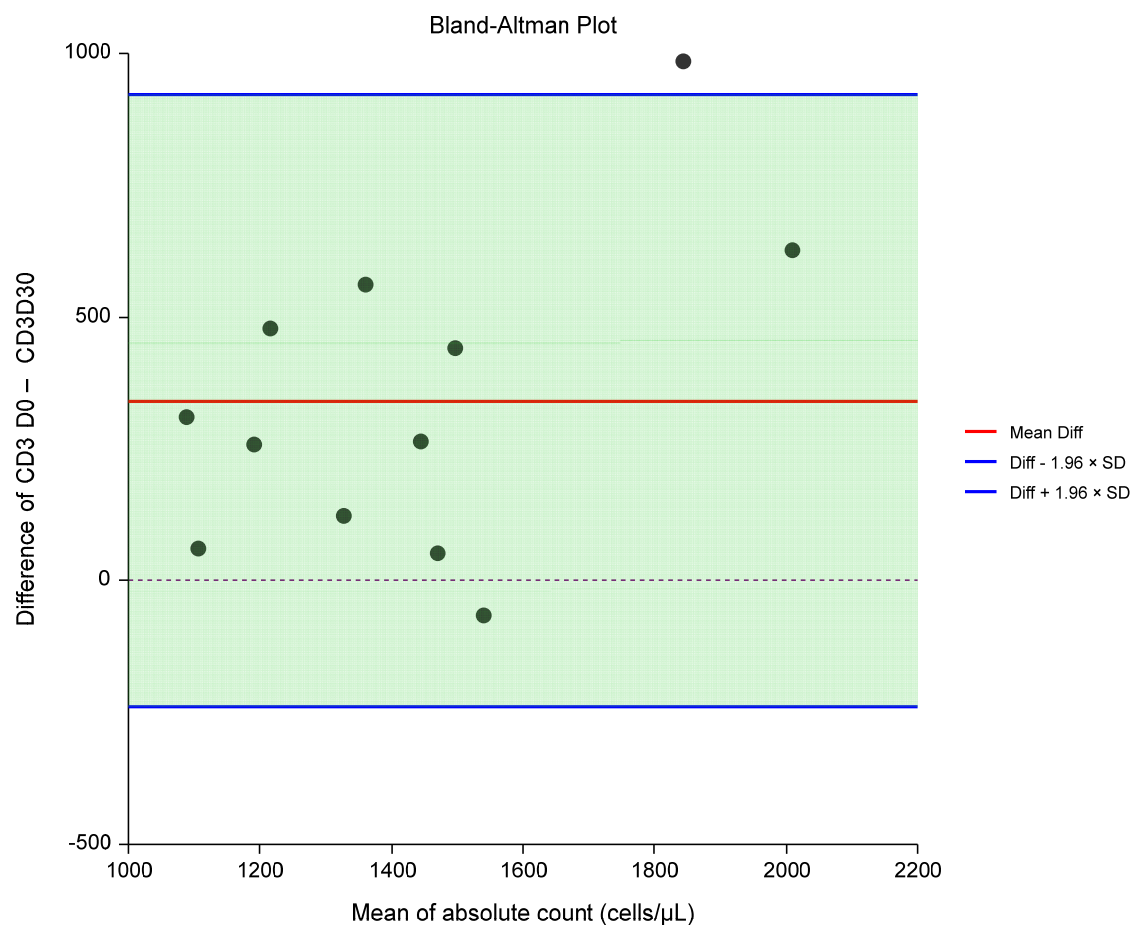

**Figure S1.** Bland-Altman plot of Absolute count of CD3 for Day 0 and Day 30 in placebo group.

**Table S1.** Bias and Limits of Agreement of Absolute count of CD3 for Day 0 and Day 30 in placebo group.

| Parameter                | Count | Value   | Standard Deviation | 95.0% LCL of Value | 95.0% UCL of Value |
|--------------------------|-------|---------|--------------------|--------------------|--------------------|
| Bias (Difference)        | 12    | 341.22  | 295.78             | 153.29             | 529.15             |
| Lower Limit of Agreement | 12    | -238.50 | 150.22             | -569.14            | 92.13              |
| Upper Limit of Agreement | 12    | 920.95  | 150.22             | 590.31             | 1251.59            |

Limits of Agreement = Difference ± 1.96 × (Standard Deviation of Difference)

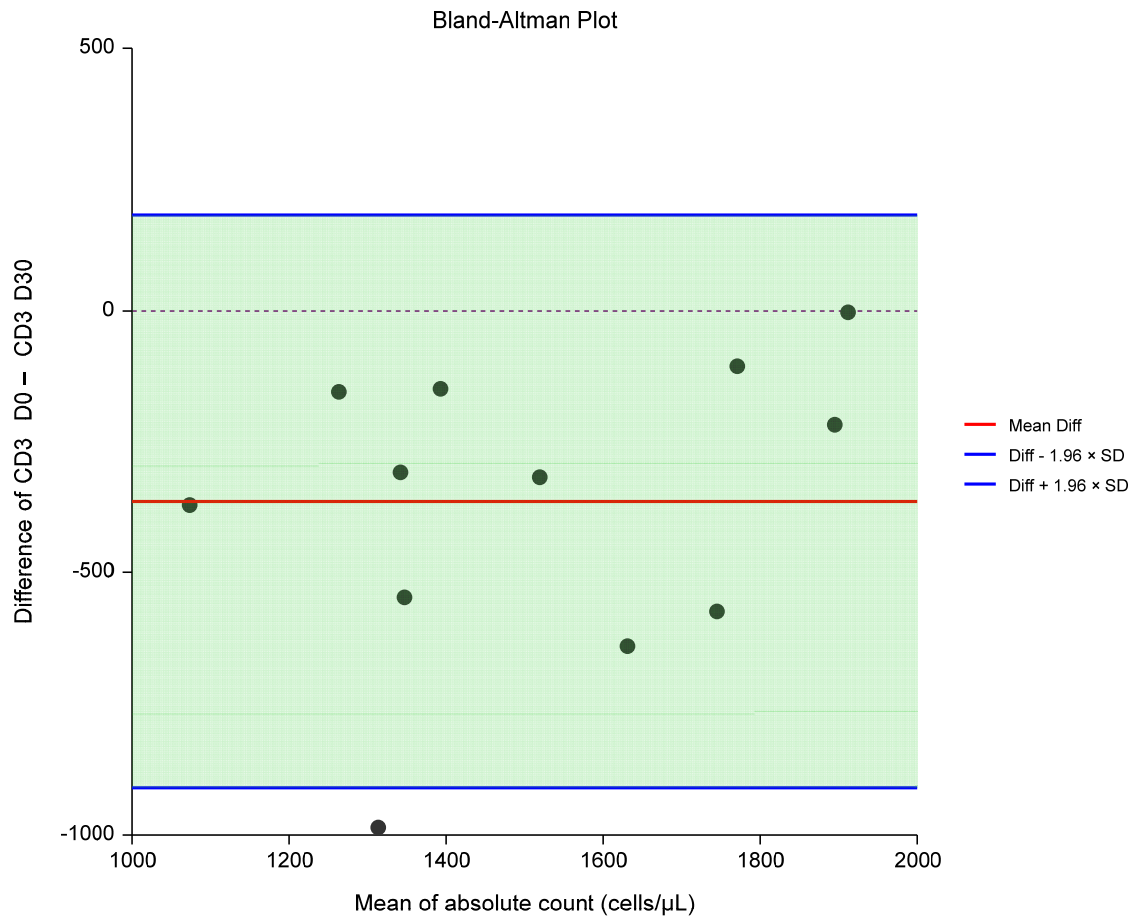

**Figure S2.** Bland-Altman plot of Absolute count of CD3 for Day 0 and Day 30 in test group.

**Table S2.** Bias and Limits of Agreement of Absolute count of CD3 for Day 0 and Day 30 in test group.

| Parameter                | Count | Value   | Standard Deviation | 95.0% LCL of Value | 95.0% UCL of Value |
|--------------------------|-------|---------|--------------------|--------------------|--------------------|
| Bias (Difference)        | 12    | -364.69 | 278.50             | -541.64            | -187.74            |
| Lower Limit of Agreement | 12    | -910.54 | 141.45             | -1221.86           | -599.23            |
| Upper Limit of Agreement | 12    | 181.16  | 141.45             | -130.16            | 492.48             |

Limits of Agreement = Difference  $\pm$  1.96  $\times$  (Standard Deviation of Difference)

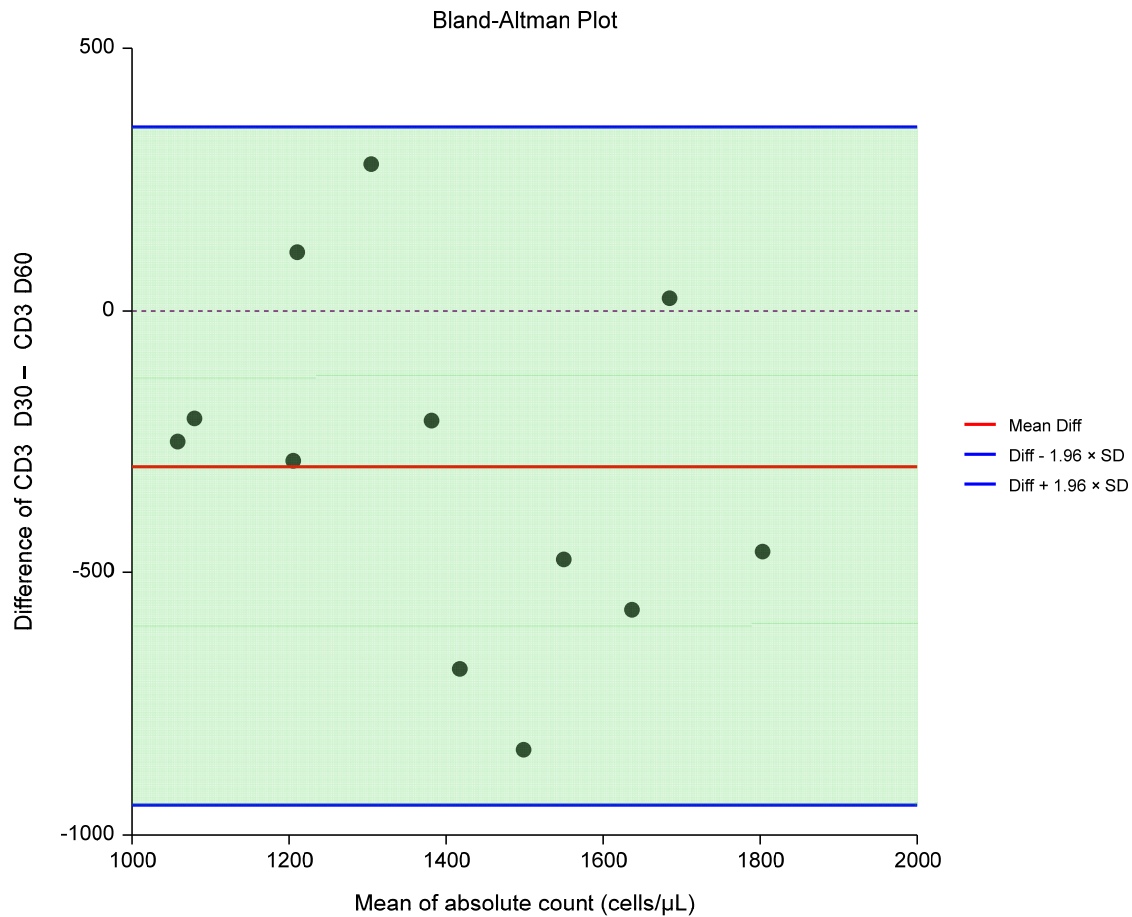

**Figure S3.** Bland-Altman plot of Absolute count of CD3 for Day 30 and Day 60 in placebo crossed over to test group.

**Table S3.** Bias and Limits of Agreement of Absolute count of CD3 for Day 30 and Day 60 in placebo crossed over to test group.

| Parameter                | Count | Value   | Standard Deviation | 95.0% LCL of Value | 95.0% UCL of Value |
|--------------------------|-------|---------|--------------------|--------------------|--------------------|
| Bias (Difference)        | 12    | -296.99 | 329.43             | -506.29            | -87.68             |
| Lower Limit of Agreement | 12    | -942.66 | 167.31             | -1310.92           | -574.41            |
| Upper Limit of Agreement | 12    | 348.69  | 167.31             | -19.56             | 716.95             |

Limits of Agreement = Difference  $\pm$  1.96  $\times$  (Standard Deviation of Difference)

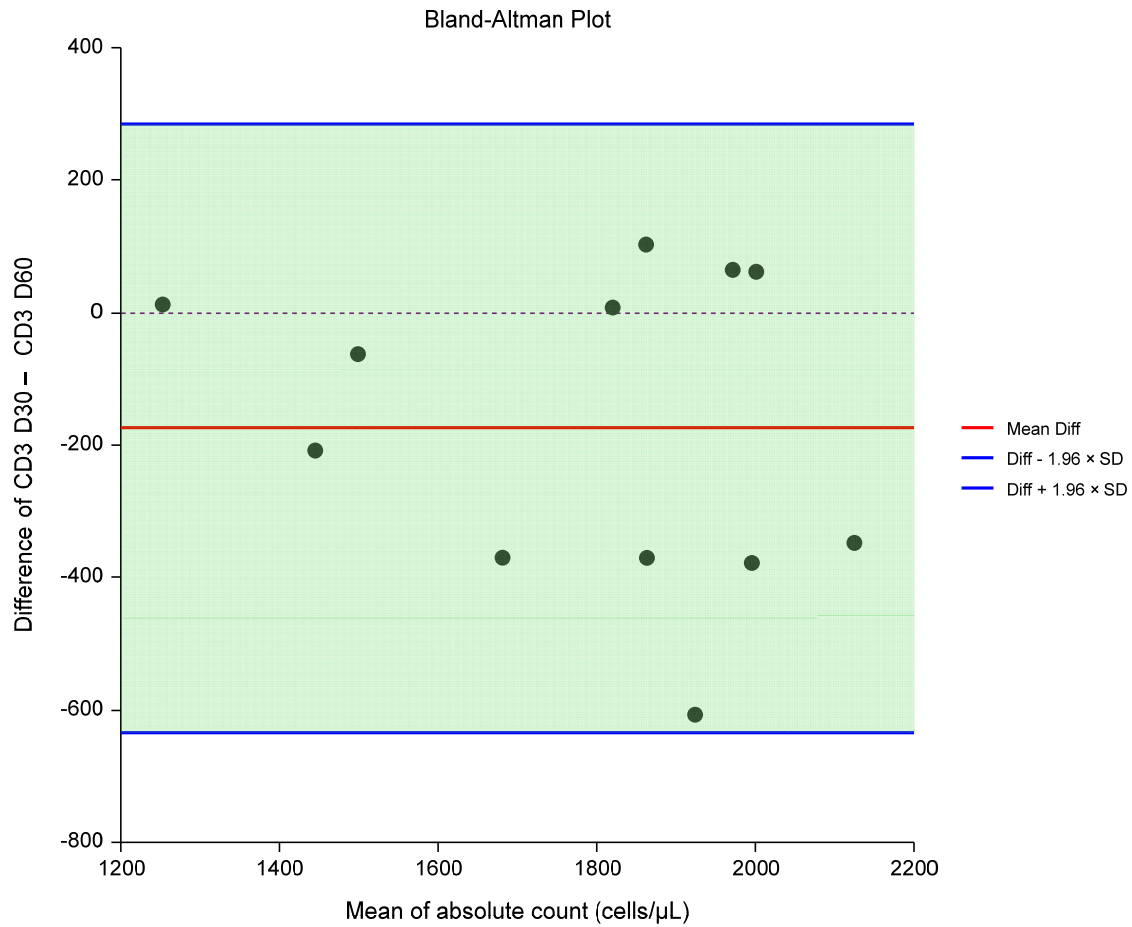

**Figure S4.** Bland-Altman plot of Absolute count of CD3 for Day 30 and Day 60 in test group.

**Table S4.** Bias and Limits of Agreement of Absolute count of CD3 for Day 30 and Day 60 in test group.

| Parameter                | Count | Value   | Standard Deviation | 95.0% LCL of Value | 95.0% UCL of Value |
|--------------------------|-------|---------|--------------------|--------------------|--------------------|
| Bias (Difference)        | 12    | -174.61 | 234.89             | -323.86            | -25.37             |
| Lower Limit of Agreement | 12    | -635.01 | 119.30             | -897.58            | -372.43            |
| Upper Limit of Agreement | 12    | 285.78  | 119.30             | 23.20              | 548.35             |

Limits of Agreement = Difference  $\pm$  1.96  $\times$  (Standard Deviation of Difference)

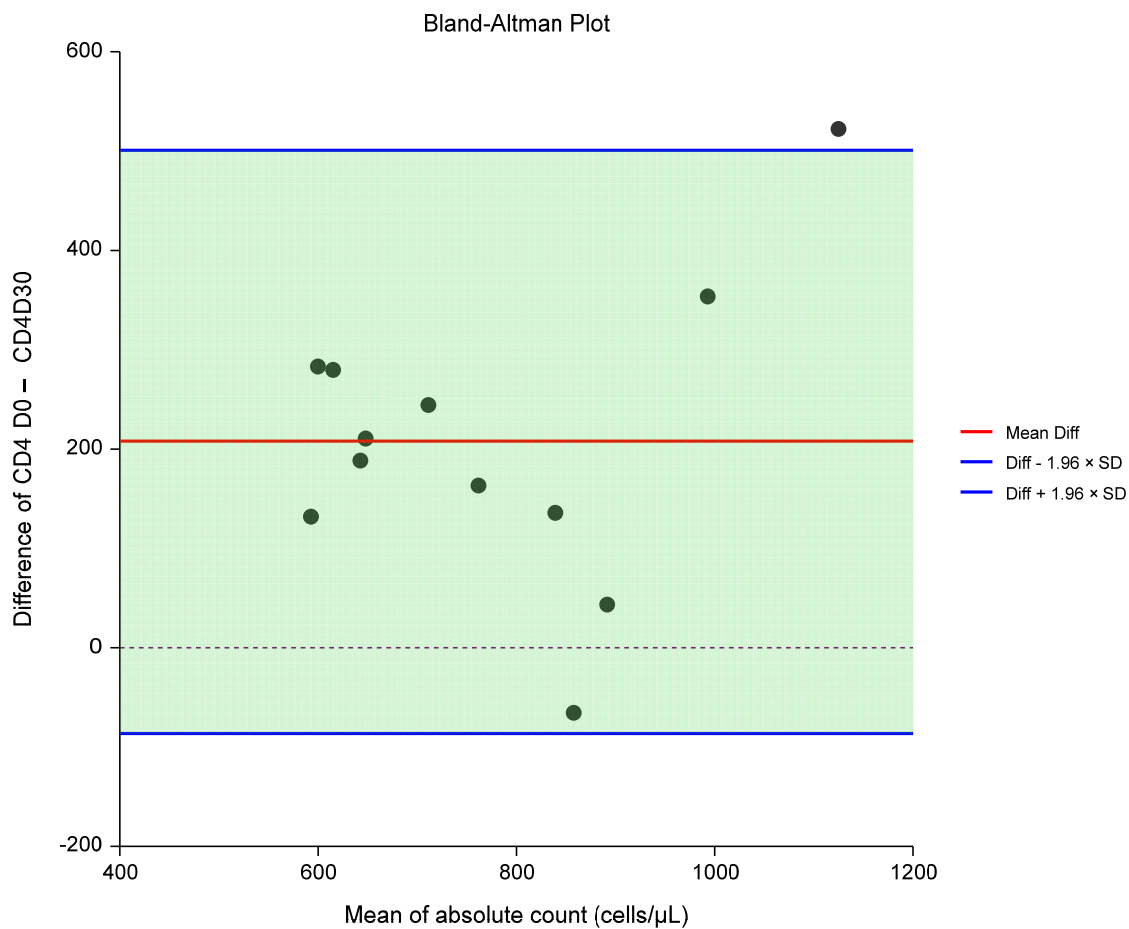

**Figure S5.** Bland-Altman plot of Absolute count of CD4 for Day 0 and Day 30 in placebo group.

**Table S5.** Bias and Limits of Agreement of Absolute count of CD4 for Day 0 and Day 30 in placebo group.

| Parameter                | Count | Value  | Standard Deviation | 95.0% LCL of Value | 95.0% UCL of Value |
|--------------------------|-------|--------|--------------------|--------------------|--------------------|
| Bias (Difference)        | 12    | 207.58 | 149.96             | 112.30             | 302.86             |
| Lower Limit of Agreement | 12    | -86.35 | 76.16              | -253.99            | 81.29              |
| Upper Limit of Agreement | 12    | 501.51 | 76.16              | 333.87             | 669.15             |

Limits of Agreement = Difference  $\pm$  1.96  $\times$  (Standard Deviation of Difference)

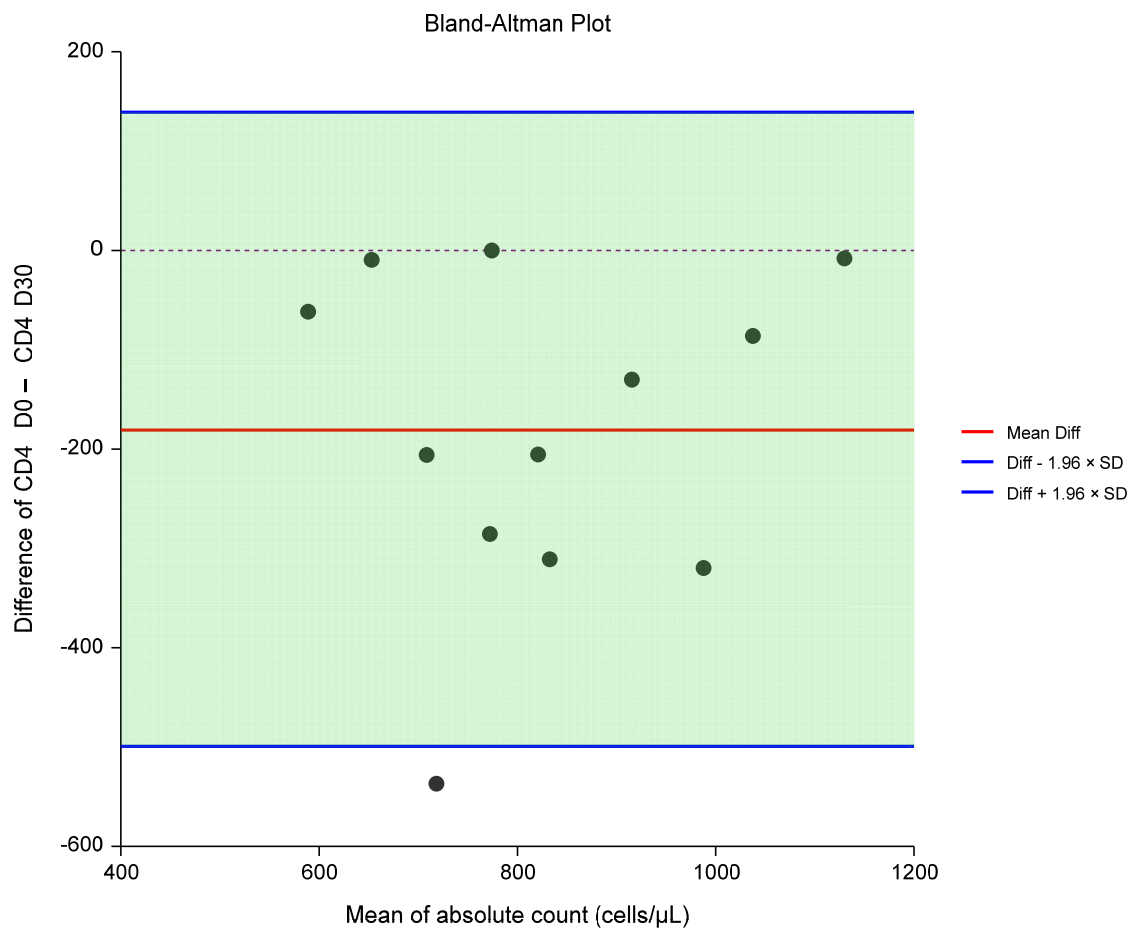

**Figure S6.** Bland-Altman plot of Absolute count of CD4 for Day 0 and Day 30 in test group.

**Table S6.** Bias and Limits of Agreement of Absolute count of CD4 for Day 0 and Day 30 in test group.

| Parameter                | Count | Value   | Standard Deviation | 95.0% LCL of Value | 95.0% UCL of Value |
|--------------------------|-------|---------|--------------------|--------------------|--------------------|
| Bias (Difference)        | 12    | -180.02 | 163.15             | -283.68            | -76.36             |
| Lower Limit of Agreement | 12    | -499.80 | 82.86              | -682.19            | -317.42            |
| Upper Limit of Agreement | 12    | 139.76  | 82.86              | -42.62             | 322.15             |

Limits of Agreement = Difference  $\pm$  1.96  $\times$  (Standard Deviation of Difference)

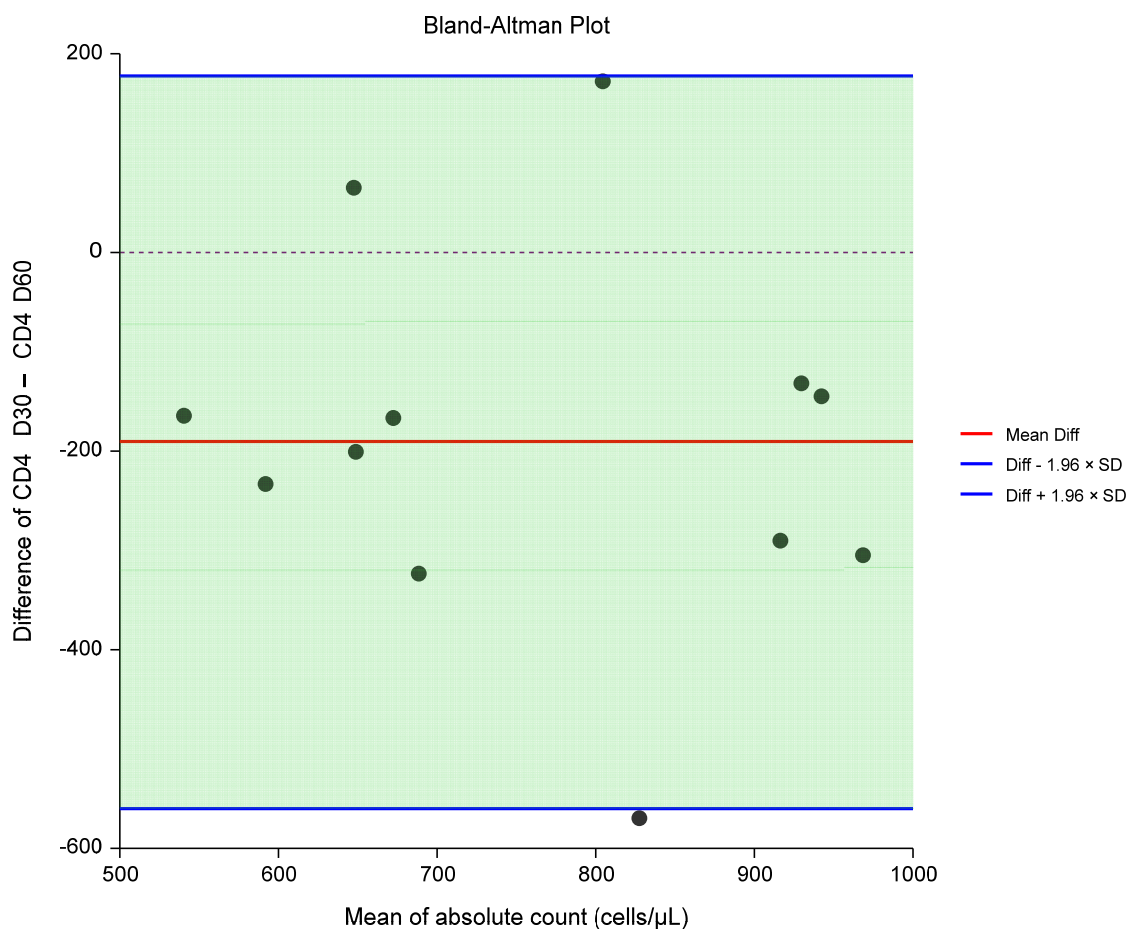

**Figure S7.** Bland-Altman plot of Absolute count of CD4 for Day 30 and Day 60 in placebo crossed over to test group.

**Table S7.** Bias and Limits of Agreement of Absolute count of CD4 for Day 30 and Day 60 in placebo crossed over to test group.

| Parameter                | Count | Value   | Standard Deviation | 95.0% LCL of Value | 95.0% UCL of Value |
|--------------------------|-------|---------|--------------------|--------------------|--------------------|
| Bias (Difference)        | 12    | -191.04 | 188.31             | -310.68            | -71.40             |
| Lower Limit of Agreement | 12    | -560.12 | 95.64              | -770.62            | -349.62            |
| Upper Limit of Agreement | 12    | 178.04  | 95.64              | -32.46             | 388.54             |

Limits of Agreement = Difference  $\pm$  1.96  $\times$  (Standard Deviation of Difference)

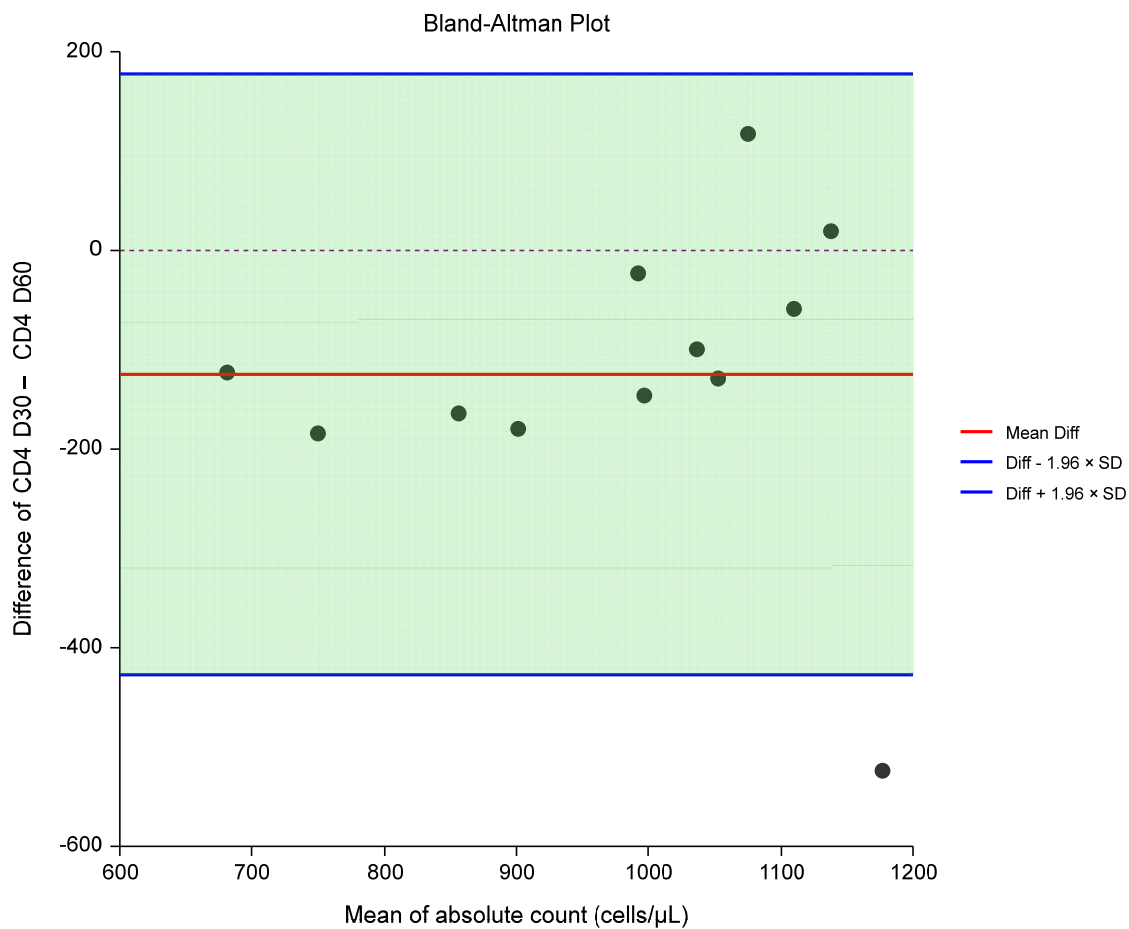

**Figure S8.** Bland-Altman plot of Absolute count of CD4 for Day 30 and Day 60 in test group.

**Table S8.** Bias and Limits of Agreement of Absolute count of CD4 for Day 30 and Day 60 in test group.

| Parameter                | Count | Value   | Standard Deviation | 95.0% LCL of Value | 95.0% UCL of Value |
|--------------------------|-------|---------|--------------------|--------------------|--------------------|
| Bias (Difference)        | 12    | -124.57 | 154.50             | -222.73            | -26.40             |
| Lower Limit of Agreement | 12    | -427.38 | 78.47              | -600.09            | -254.68            |
| Upper Limit of Agreement | 12    | 178.25  | 78.47              | 5.54               | 350.95             |

Limits of Agreement = Difference  $\pm$  1.96  $\times$  (Standard Deviation of Difference)



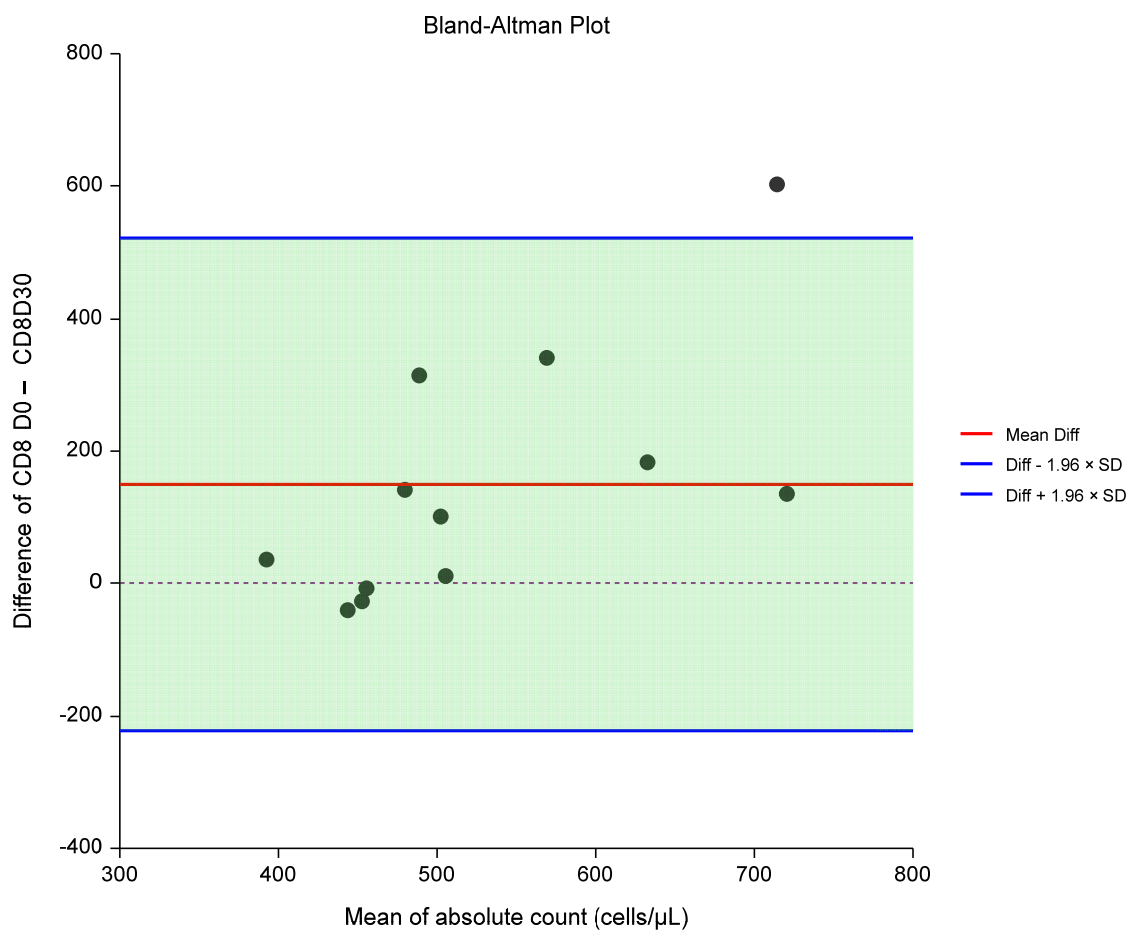

**Figure S9.** Bland-Altman plot of Absolute count of CD8 for Day 0 and Day 30 in placebo group.

**Table S9.** Bias and Limits of Agreement of Absolute count of CD8 for Day 0 and Day 30 in placebo group.

| Parameter                | Count | Value   | Standard Deviation | 95.0% LCL of Value | 95.0% UCL of Value |
|--------------------------|-------|---------|--------------------|--------------------|--------------------|
| Bias (Difference)        | 12    | 149.32  | 189.88             | 28.67              | 269.96             |
| Lower Limit of Agreement | 12    | -222.86 | 96.44              | -435.12            | -10.59             |
| Upper Limit of Agreement | 12    | 521.49  | 96.44              | 309.22             | 733.75             |

Limits of Agreement = Difference  $\pm$  1.96  $\times$  (Standard Deviation of Difference)

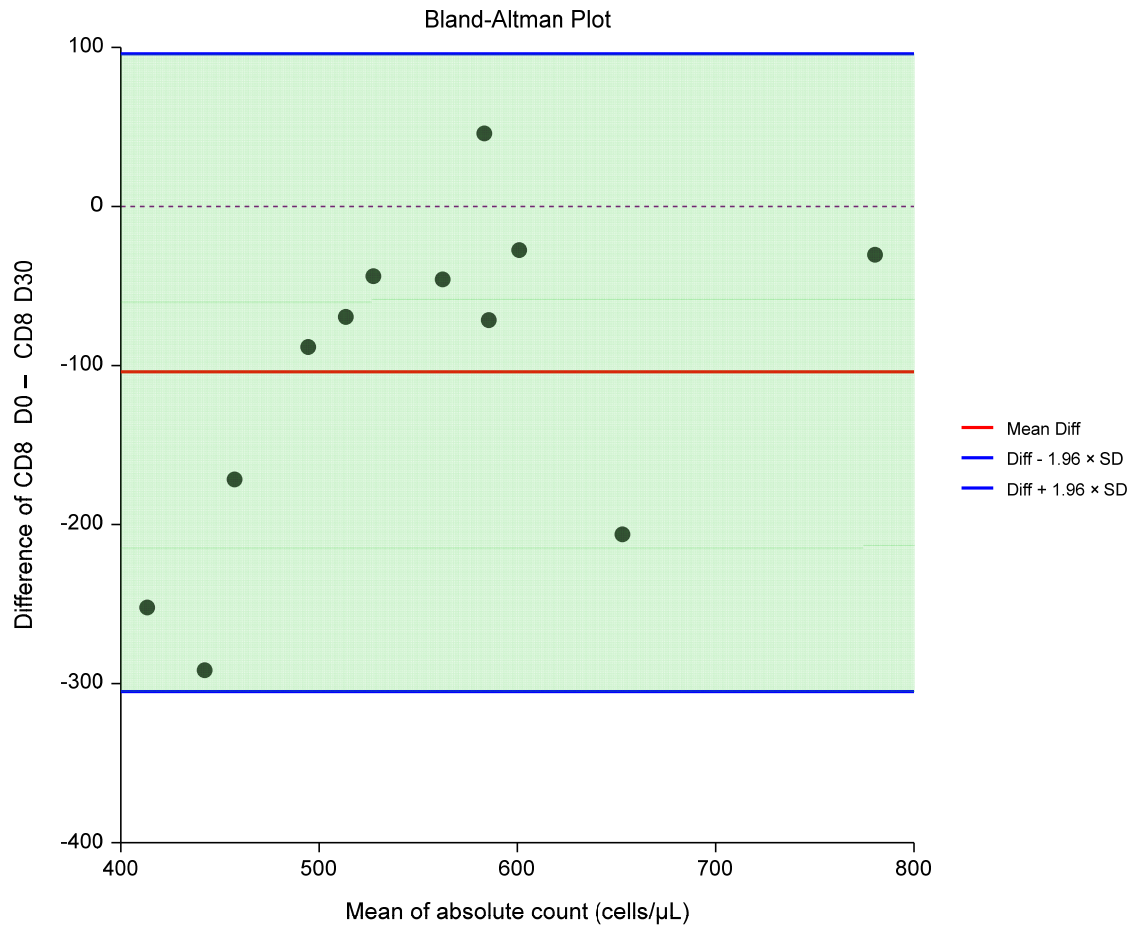

**Figure S10.** Bland-Altman plot of Absolute count of CD8 for Day 0 and Day 30 in test group.

**Table S10.** Bias and Limits of Agreement of Absolute count of CD8 for Day 0 and Day 30 in test group.

| Parameter                | Count | Value   | Standard Deviation | 95.0% LCL of Value | 95.0% UCL of Value |
|--------------------------|-------|---------|--------------------|--------------------|--------------------|
| Bias (Difference)        | 12    | -104.36 | 102.43             | -169.44            | -39.28             |
| Lower Limit of Agreement | 12    | -305.13 | 52.03              | -419.64            | -190.62            |
| Upper Limit of Agreement | 12    | 96.41   | 52.03              | -18.09             | 210.92             |

Limits of Agreement = Difference  $\pm$  1.96  $\times$  (Standard Deviation of Difference)

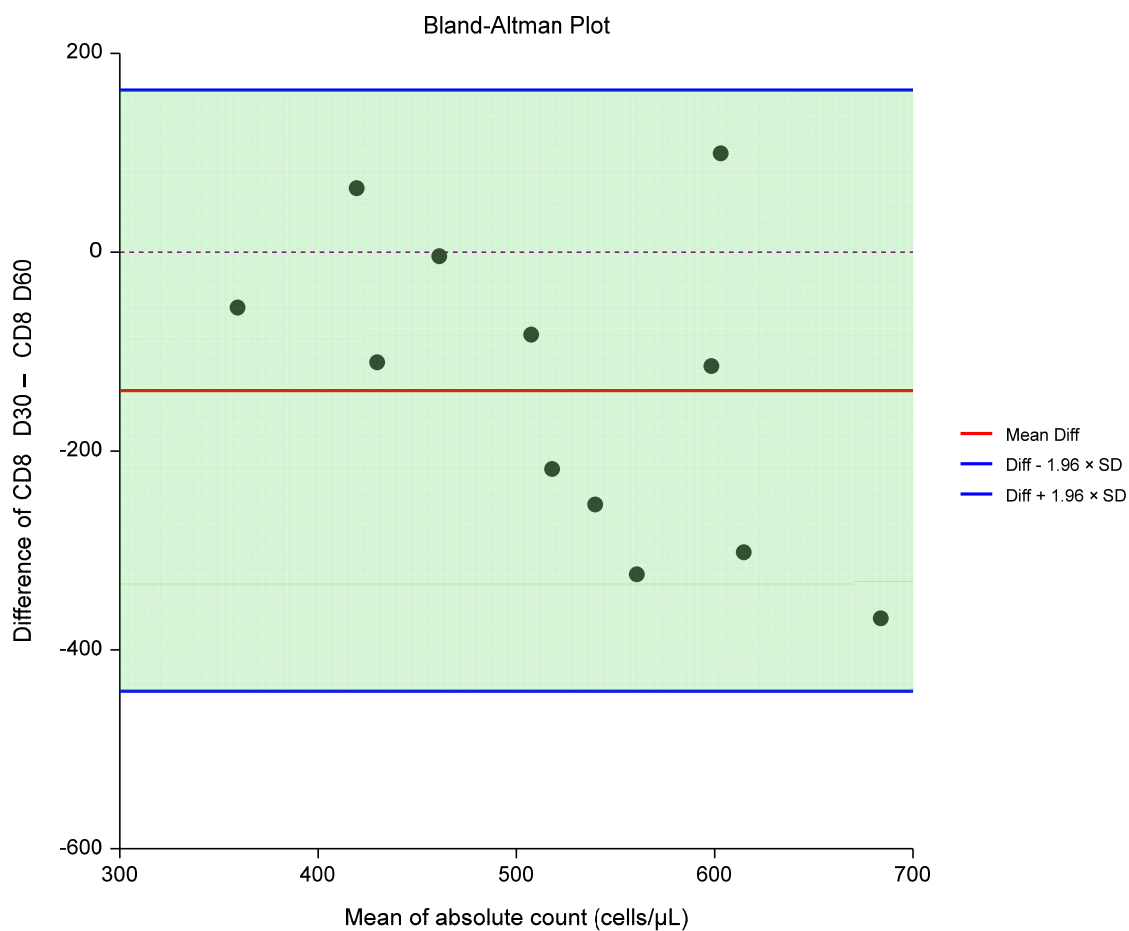

**Figure S11.** Bland-Altman plot of Absolute count of CD8 for Day 30 and Day 60 in placebo crossed over to test group.

**Table S11.** Bias and Limits of Agreement of Absolute count of CD8 for Day 30 and Day 60 in placebo crossed over to test group.

| Parameter                | Count | Value   | Standard Deviation | 95.0% LCL of Value | 95.0% UCL of Value |
|--------------------------|-------|---------|--------------------|--------------------|--------------------|
| Bias (Difference)        | 12    | -139.12 | 153.95             | -236.94            | -41.31             |
| Lower Limit of Agreement | 12    | -440.86 | 78.19              | -612.95            | -268.77            |
| Upper Limit of Agreement | 12    | 162.61  | 78.19              | -9.48              | 334.71             |

Limits of Agreement = Difference  $\pm$  1.96  $\times$  (Standard Deviation of Difference)

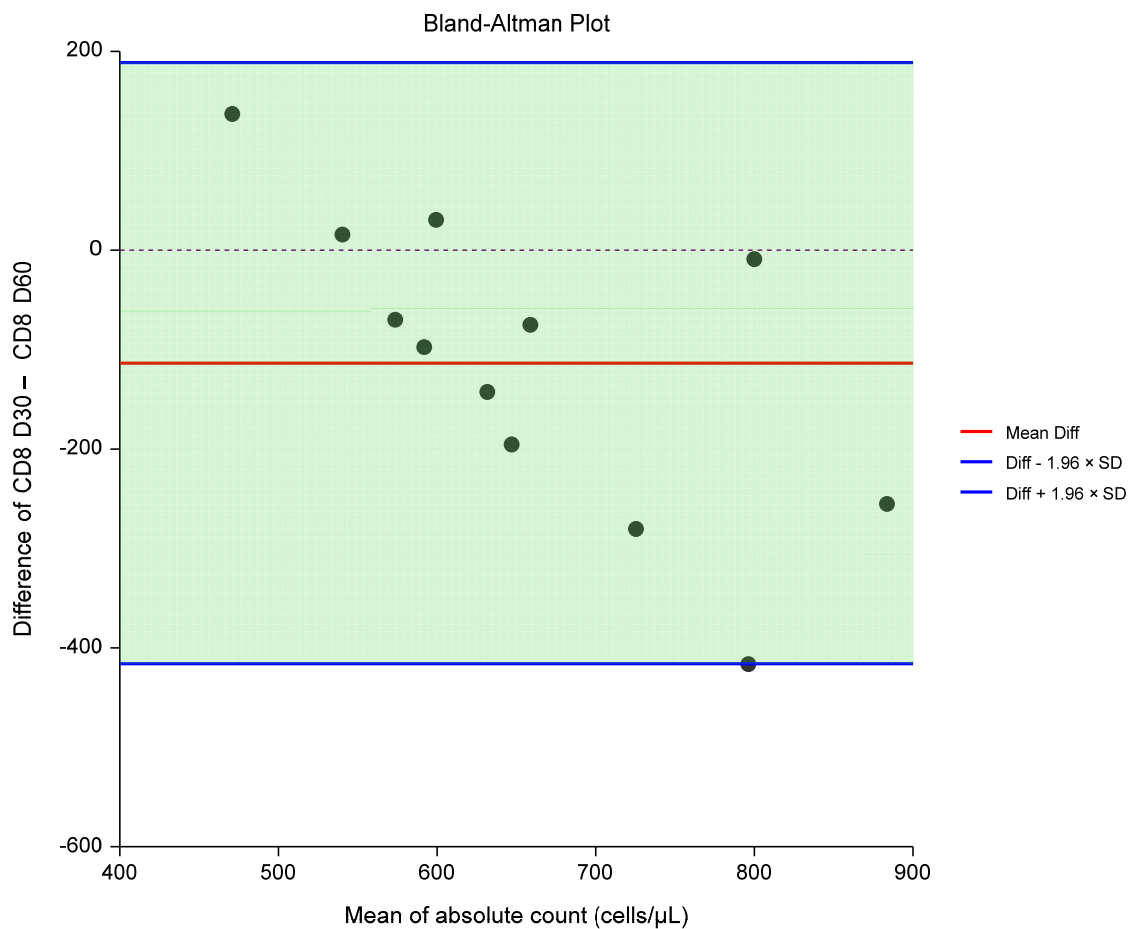

**Figure S12.** Bland-Altman plot of Absolute count of CD8 for Day 30 and Day 60 in test group.

**Table S12.** Bias and Limits of Agreement of Absolute count of CD8 for Day 30 and Day 60 in test group.

| Parameter                | Count | Value   | Standard Deviation | 95.0% LCL of Value | 95.0% UCL of Value |
|--------------------------|-------|---------|--------------------|--------------------|--------------------|
| Bias (Difference)        | 12    | -113.16 | 154.35             | -211.23            | -15.09             |
| Lower Limit of Agreement | 12    | -415.68 | 78.39              | -588.22            | -243.14            |
| Upper Limit of Agreement | 12    | 189.36  | 78.39              | 16.82              | 361.90             |

Limits of Agreement = Difference  $\pm$  1.96  $\times$  (Standard Deviation of Difference)

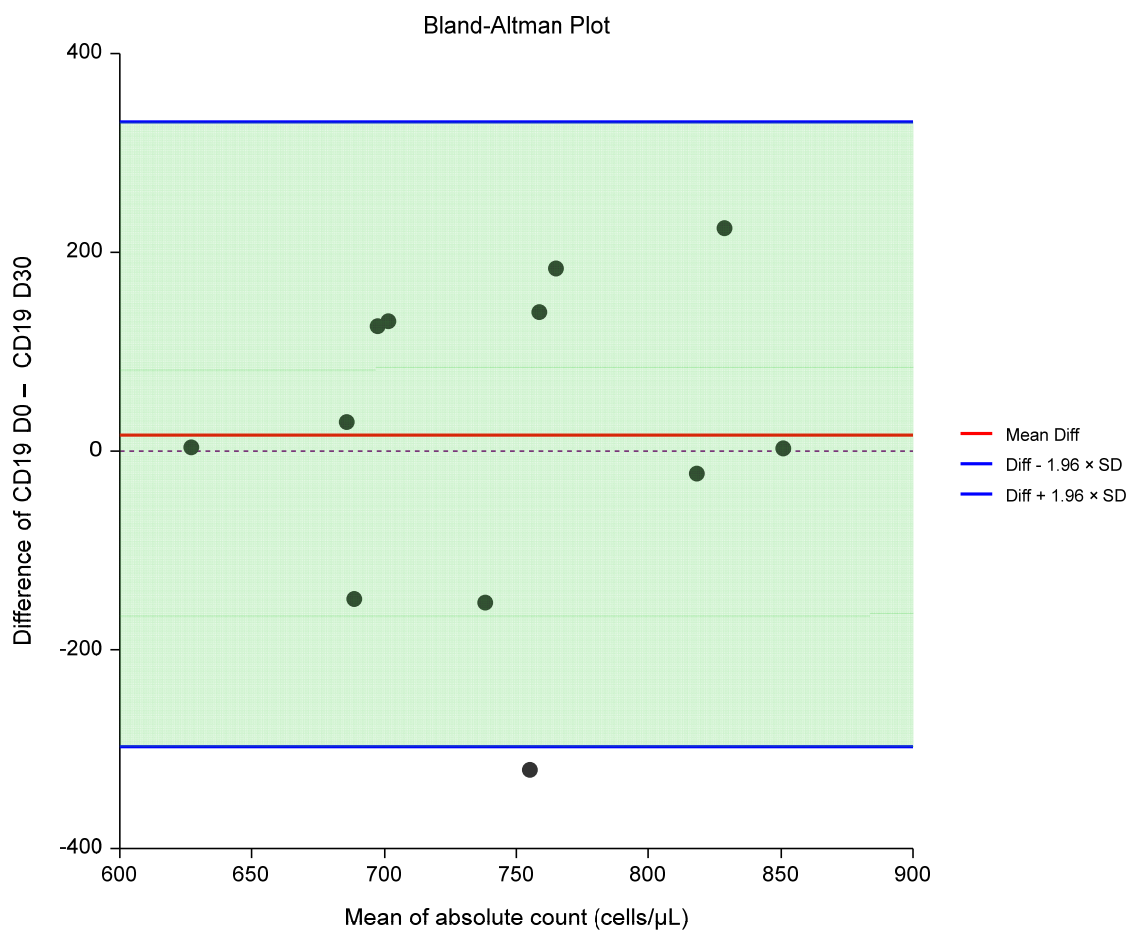

**Figure S13.** Bland-Altman plot of Absolute count of CD19 for Day 0 and Day 30 in placebo group.

**Table S13.** Bias and Limits of Agreement of Absolute count of CD19 for Day 0 and Day 30 in placebo group.

| Parameter                | Count | Value   | Standard Deviation | 95.0% LCL of Value | 95.0% UCL of Value |
|--------------------------|-------|---------|--------------------|--------------------|--------------------|
| Bias (Difference)        | 12    | 16.23   | 160.42             | -85.70             | 118.16             |
| Lower Limit of Agreement | 12    | -298.20 | 81.48              | -477.53            | -118.87            |
| Upper Limit of Agreement | 12    | 330.66  | 81.48              | 151.33             | 509.99             |

Limits of Agreement = Difference  $\pm$  1.96  $\times$  (Standard Deviation of Difference)

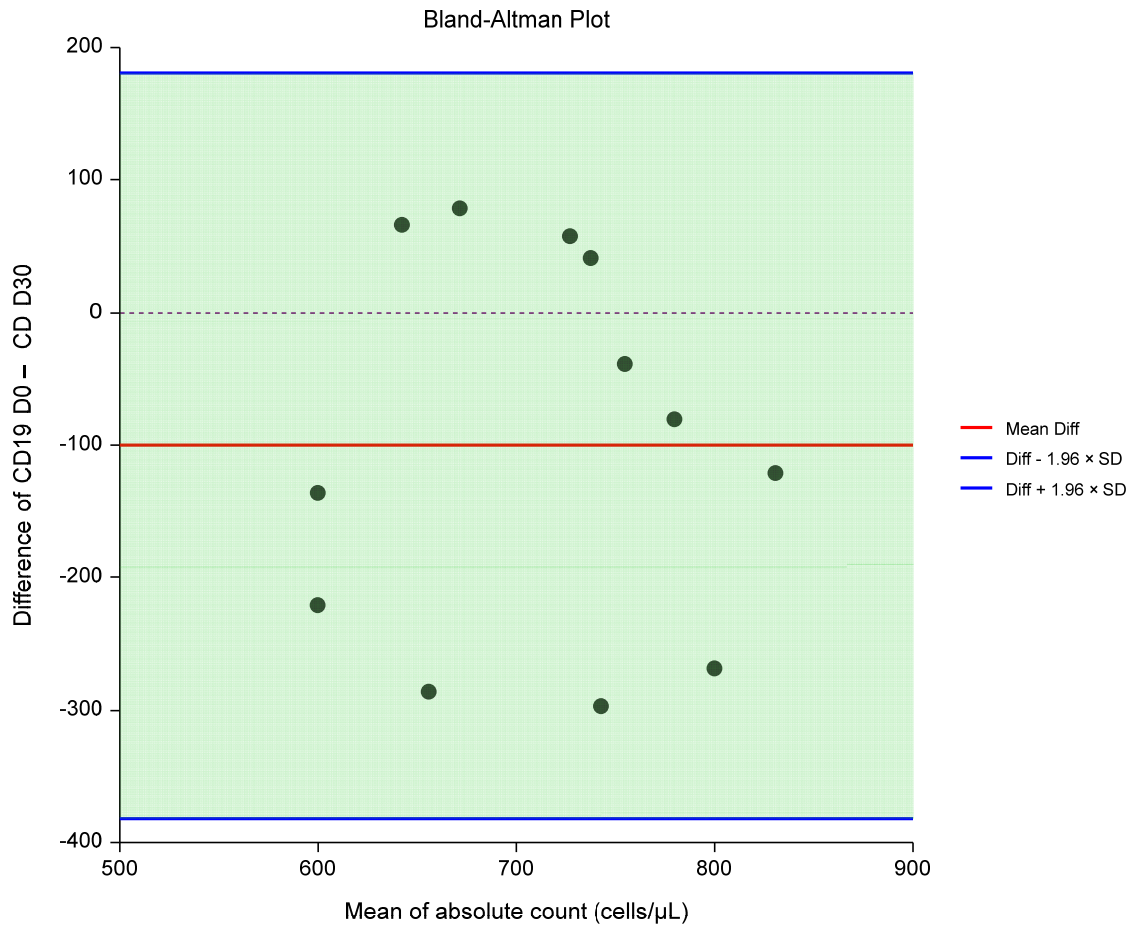

**Figure S14.** Bland-Altman plot of Absolute count of CD19 for Day 0 and Day 30 in test group.

**Table S14.** Bias and Limits of Agreement of Absolute count of CD19 for Day 0 and Day 30 in test group.

| Parameter                | Count | Value   | Standard Deviation | 95.0% LCL of Value | 95.0% UCL of Value |
|--------------------------|-------|---------|--------------------|--------------------|--------------------|
| Bias (Difference)        | 12    | -100.45 | 143.57             | -191.67            | -9.23              |
| Lower Limit of Agreement | 12    | -381.84 | 72.92              | -542.33            | -221.36            |
| Upper Limit of Agreement | 12    | 180.94  | 72.92              | 20.45              | 341.43             |

Limits of Agreement = Difference  $\pm$  1.96  $\times$  (Standard Deviation of Difference)

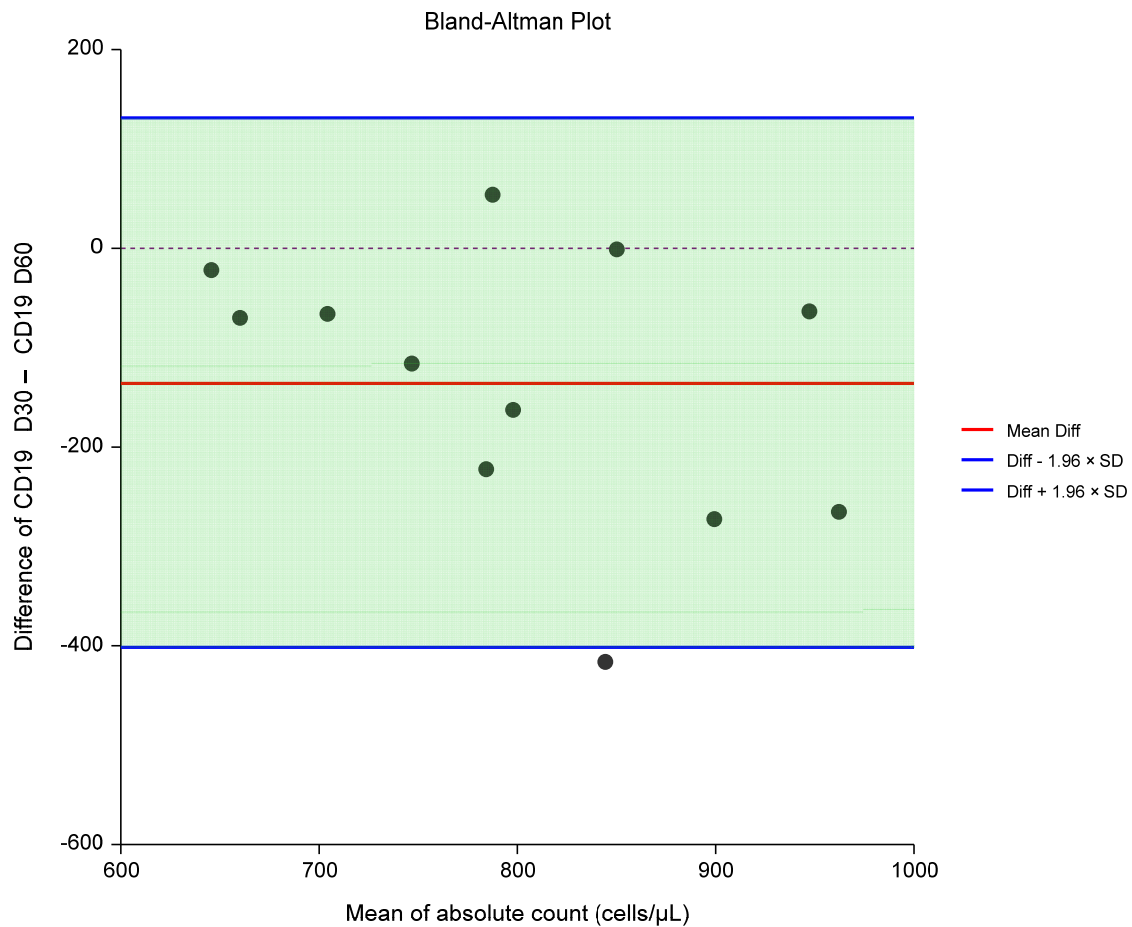

**Figure S15.** Bland-Altman plot of Absolute count of CD19 for Day 30 and Day 60 in placebo crossed over to test group.

**Table S15.** Bias and Limits of Agreement of Absolute count of CD19 for Day 30 and Day 60 in placebo crossed over to test group.

| Parameter                | Count | Value   | Standard Deviation | 95.0% LCL of Value | 95.0% UCL of Value |
|--------------------------|-------|---------|--------------------|--------------------|--------------------|
| Bias (Difference)        | 12    | -135.27 | 136.26             | -221.84            | -48.70             |
| Lower Limit of Agreement | 12    | -402.33 | 69.20              | -554.65            | -250.02            |
| Upper Limit of Agreement | 12    | 131.79  | 69.20              | -20.52             | 284.11             |

Limits of Agreement = Difference  $\pm$  1.96  $\times$  (Standard Deviation of Difference)

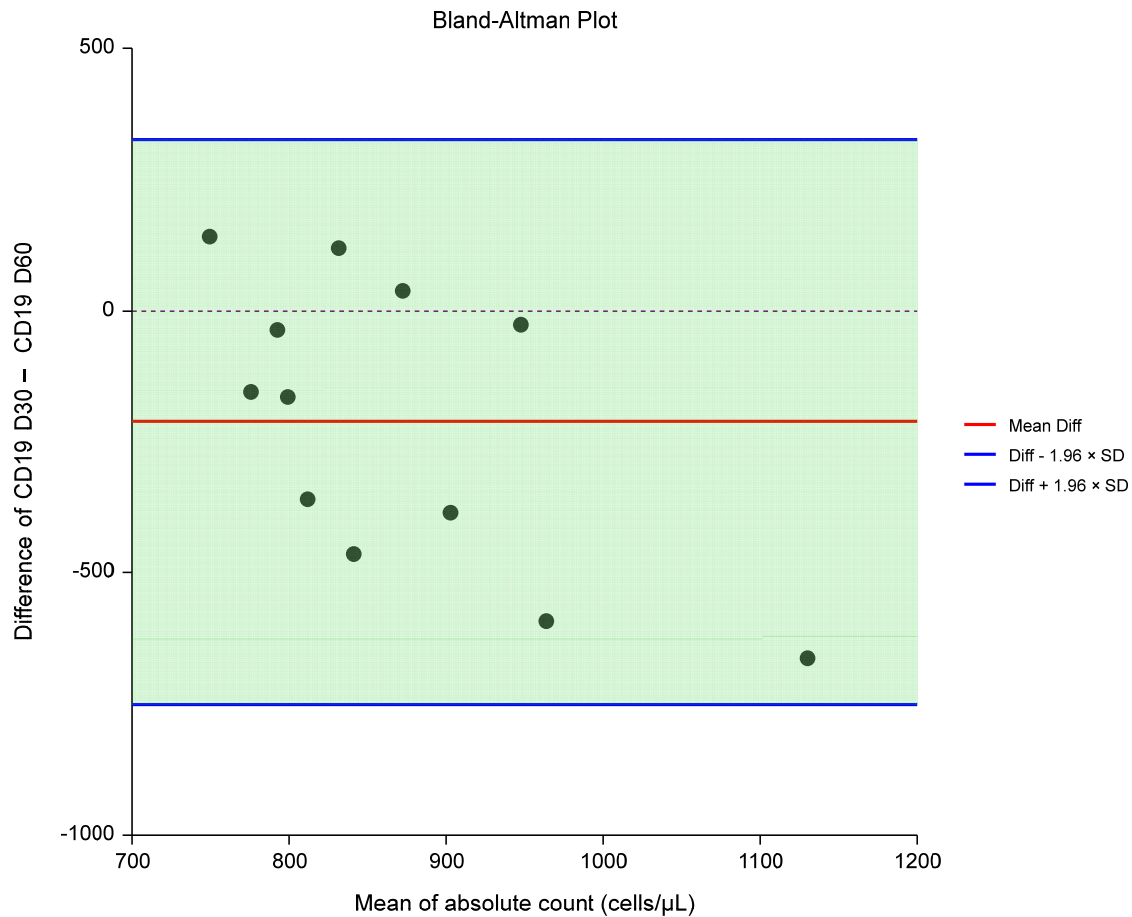

**Figure S16.** Bland-Altman plot of Absolute count of CD19 for Day 30 and Day 60 in test group.

**Table S16.** Bias and Limits of Agreement of Absolute count of CD19 for Day 30 and Day 60 in test group.

| Parameter                | Count | Value   | Standard Deviation | 95.0% LCL of Value | 95.0% UCL of Value |
|--------------------------|-------|---------|--------------------|--------------------|--------------------|
| Bias (Difference)        | 12    | -212.41 | 274.66             | -386.92            | -37.91             |
| Lower Limit of Agreement | 12    | -750.74 | 139.49             | -1057.77           | -443.71            |
| Upper Limit of Agreement | 12    | 325.91  | 139.49             | 18.89              | 632.94             |

Limits of Agreement = Difference  $\pm$  1.96  $\times$  (Standard Deviation of Difference)



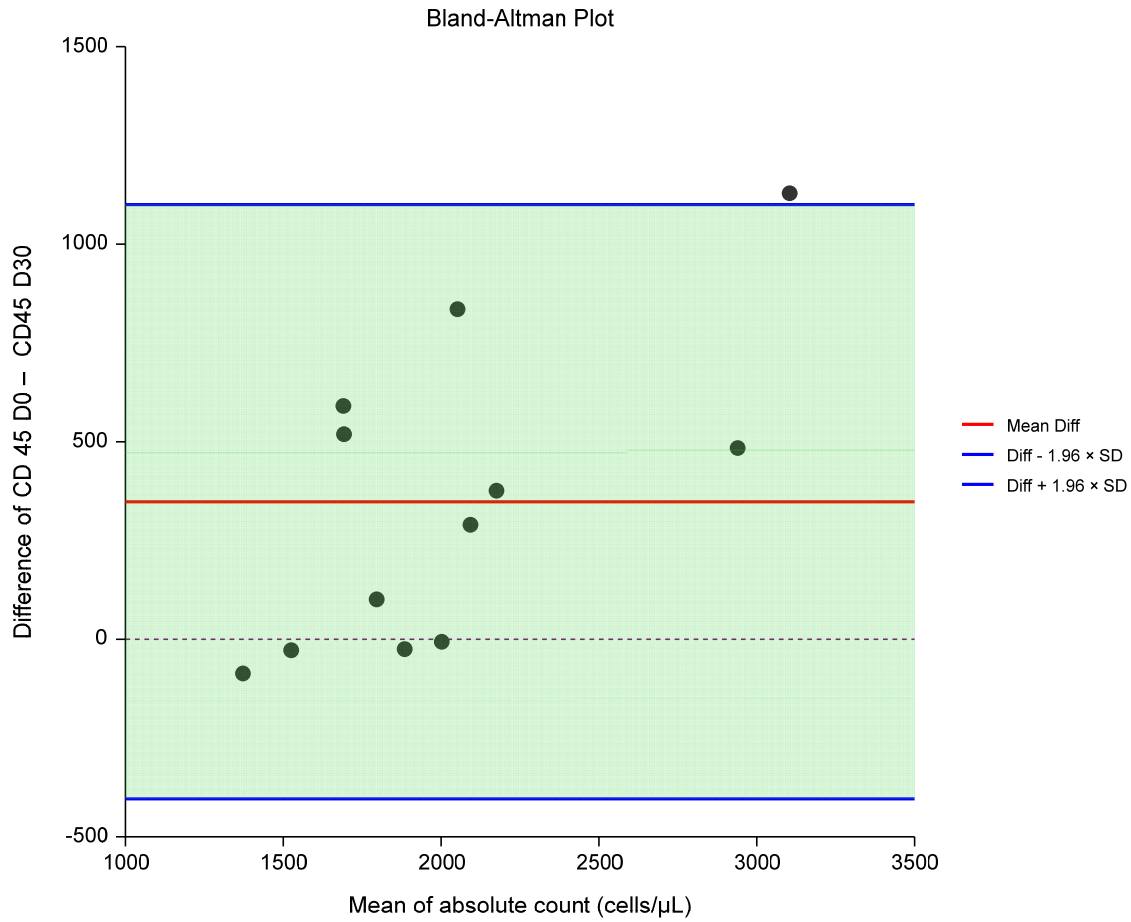

**Figure S17.** Bland-Altman plot of Absolute count of CD45 for Day 0 and Day 30 in placebo group.

**Table S17.** Bias and Limits of Agreement of Absolute count of CD45 for Day 0 and Day 30 in placebo group.

| Parameter                | Count | Value   | Standard Deviation | 95.0% LCL of Value | 95.0% UCL of Value |
|--------------------------|-------|---------|--------------------|--------------------|--------------------|
| Bias (Difference)        | 12    | 348.26  | 383.04             | 104.89             | 591.64             |
| Lower Limit of Agreement | 12    | -402.50 | 194.54             | -830.69            | 25.69              |
| Upper Limit of Agreement | 12    | 1099.03 | 194.54             | 670.84             | 1527.22            |

Limits of Agreement = Difference  $\pm$  1.96  $\times$  (Standard Deviation of Difference)

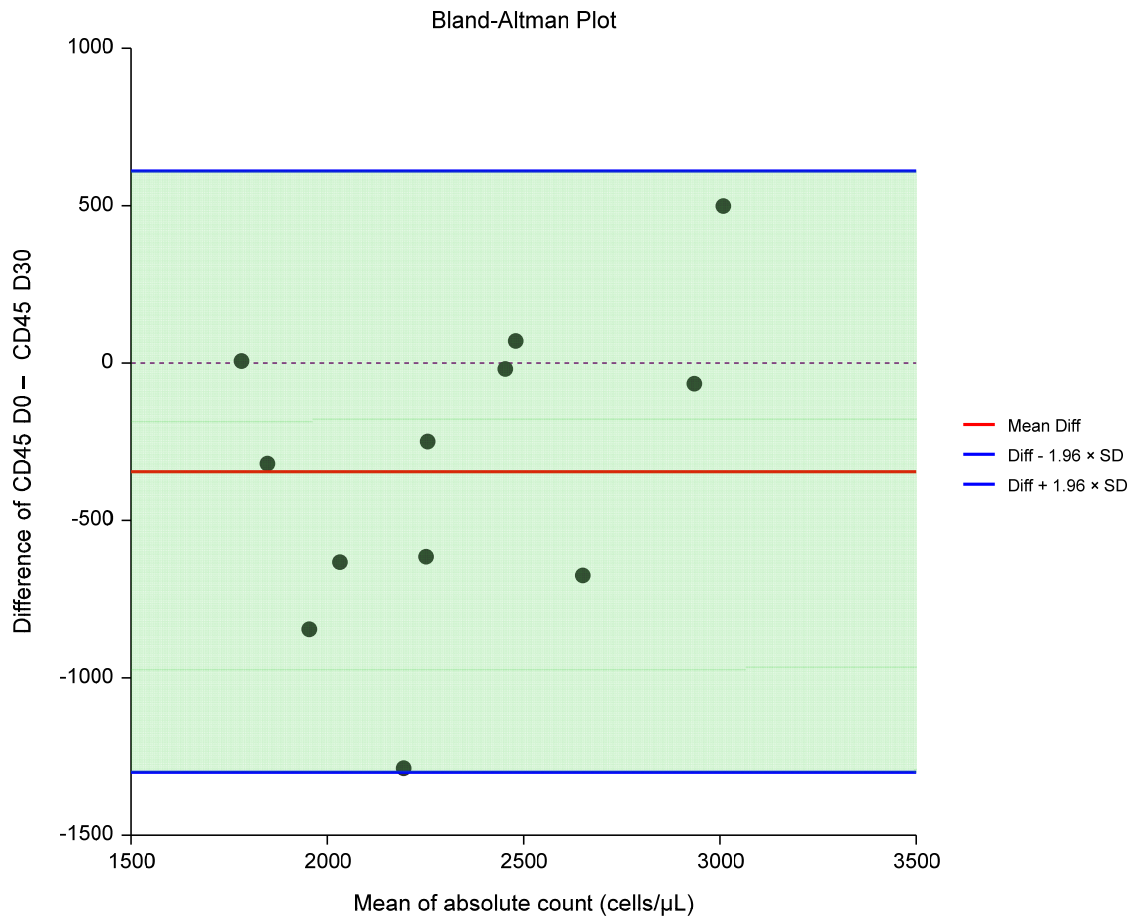

**Figure S18.** Bland-Altman plot of Absolute count of CD45 for Day 0 and Day 30 in test group.

**Table S18.** Bias and Limits of Agreement of Absolute count of CD45 for Day 0 and Day 30 in test group.

| Parameter                | Count | Value    | Standard Deviation | 95.0% LCL of Value | 95.0% UCL of Value |
|--------------------------|-------|----------|--------------------|--------------------|--------------------|
| Bias (Difference)        | 12    | -344.39  | 486.68             | -653.61            | -35.16             |
| Lower Limit of Agreement | 12    | -1298.28 | 247.18             | -1842.31           | -754.24            |
| Upper Limit of Agreement | 12    | 609.50   | 247.18             | 65.47              | 1153.54            |

Limits of Agreement = Difference  $\pm$  1.96  $\times$  (Standard Deviation of Difference)

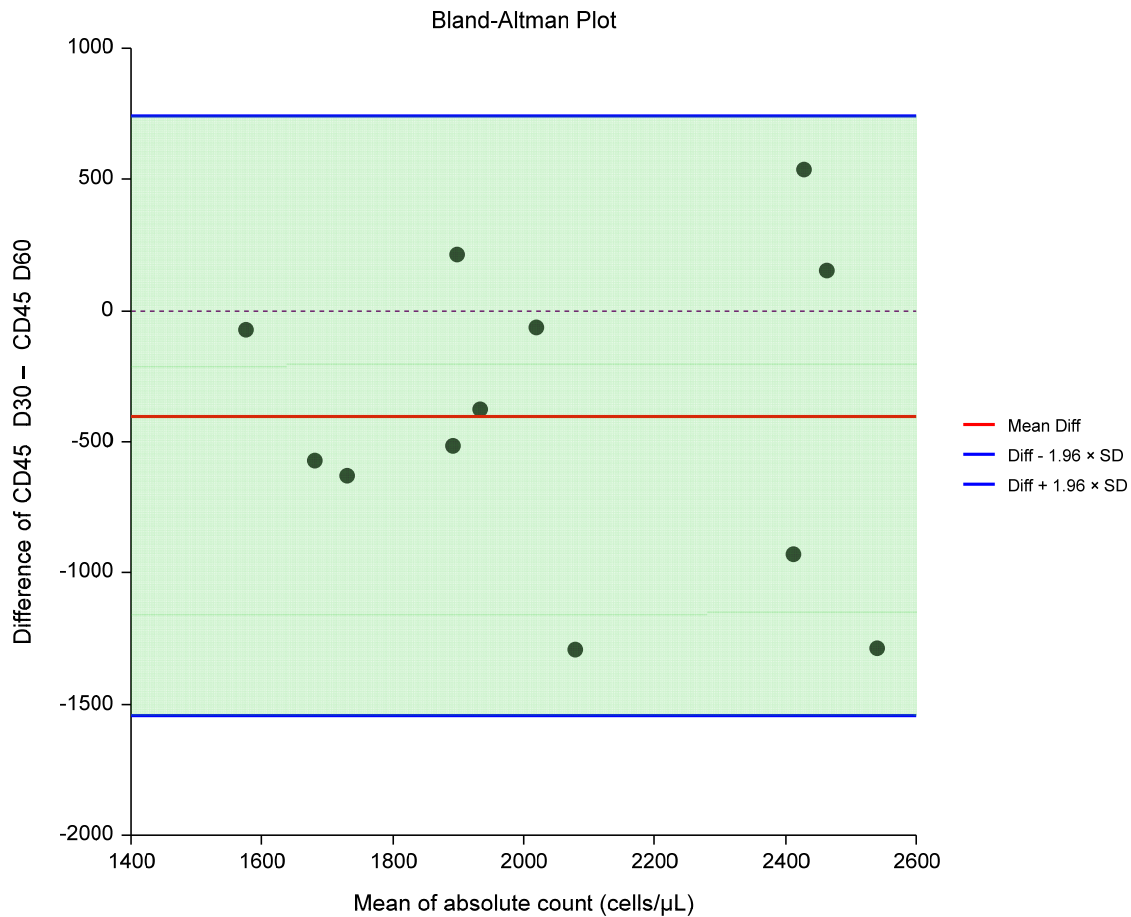

**Figure S19.** Bland–Altman plot of Absolute count of CD45 for Day 30 and Day 60 in placebo crossed over to test group.

**Table S19.** Bias and Limits of Agreement of Absolute count of CD45 for Day 30 and Day 60 in placebo crossed over to test group.

| Parameter                | Count | Value    | Standard Deviation | 95.0% LCL of Value | 95.0% UCL of Value |
|--------------------------|-------|----------|--------------------|--------------------|--------------------|
| Bias (Difference)        | 12    | -402.92  | 583.11             | -773.40            | -32.43             |
| Lower Limit of Agreement | 12    | -1545.80 | 296.15             | -2197.63           | -893.98            |
| Upper Limit of Agreement | 12    | 739.97   | 296.15             | 88.14              | 1391.80            |

Limits of Agreement = Difference  $\pm$  1.96  $\times$  (Standard Deviation of Difference)

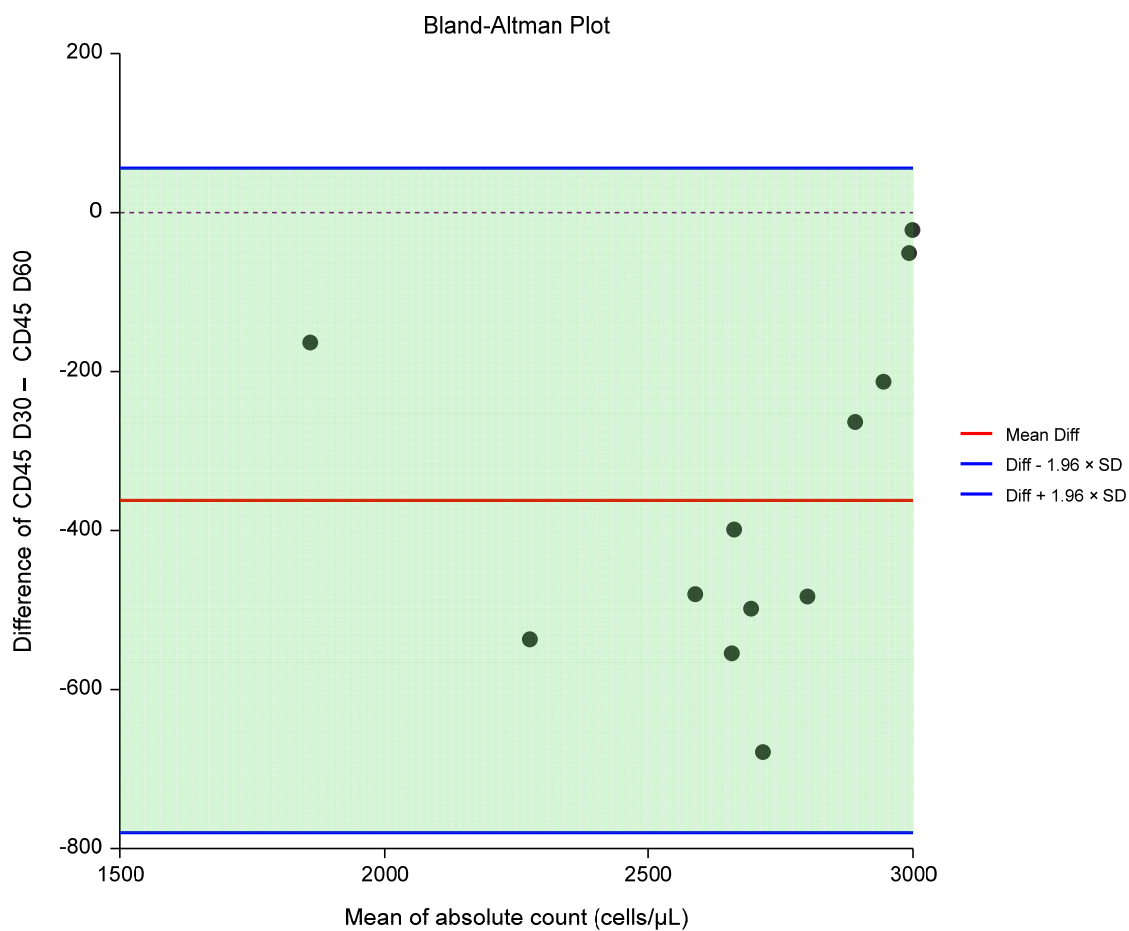

**Figure S20.** Bland-Altman plot of Absolute count of CD45 for Day 30 and Day 60 in test group.

**Table S20.** Bias and Limits of Agreement of Absolute count of CD45 for Day 30 and Day 60 in test group.

| Parameter                | Count | Value   | Standard Deviation | 95.0% LCL of Value | 95.0% UCL of Value |
|--------------------------|-------|---------|--------------------|--------------------|--------------------|
| Bias (Difference)        | 12    | -361.88 | 213.23             | -497.37            | -226.40            |
| Lower Limit of Agreement | 12    | -779.82 | 108.30             | -1018.19           | -541.46            |
| Upper Limit of Agreement | 12    | 56.05   | 108.30             | -182.31            | 294.42             |

Limits of Agreement = Difference  $\pm$  1.96  $\times$  (Standard Deviation of Difference)

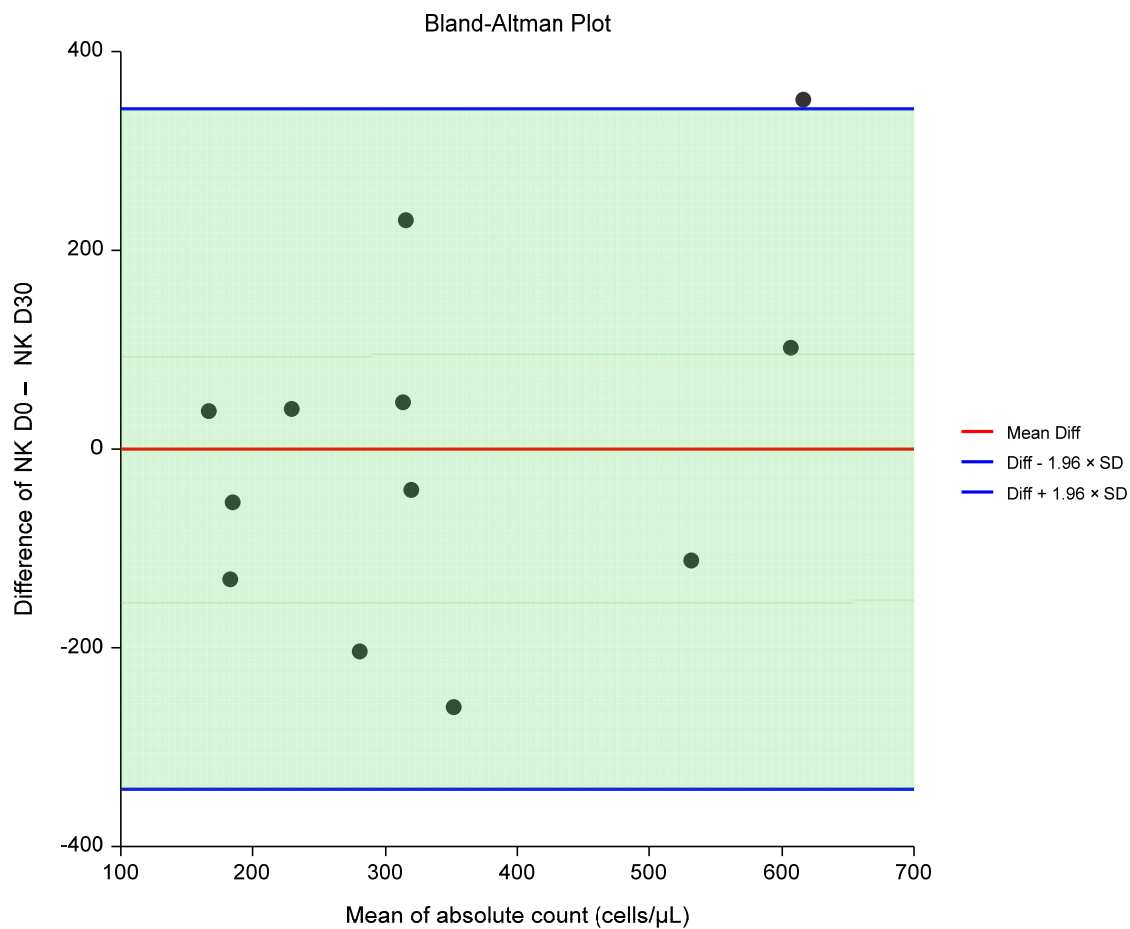

**Figure S21.** Bland-Altman plot of Absolute count of NK for Day 0 and Day 30 in placebo group.

**Table S21.** Bias and Limits of Agreement of Absolute count of NK for Day 0 and Day 30 in placebo group

| Parameter                | Count | Value   | Standard Deviation | 95.0% LCL of Value | 95.0% UCL of Value |
|--------------------------|-------|---------|--------------------|--------------------|--------------------|
| Bias (Difference)        | 12    | 0.69    | 174.69             | -110.31            | 111.68             |
| Lower Limit of Agreement | 12    | -341.71 | 88.72              | -536.99            | -146.43            |
| Upper Limit of Agreement | 12    | 343.09  | 88.72              | 147.81             | 538.37             |

Limits of Agreement = Difference  $\pm$  1.96  $\times$  (Standard Deviation of Difference)

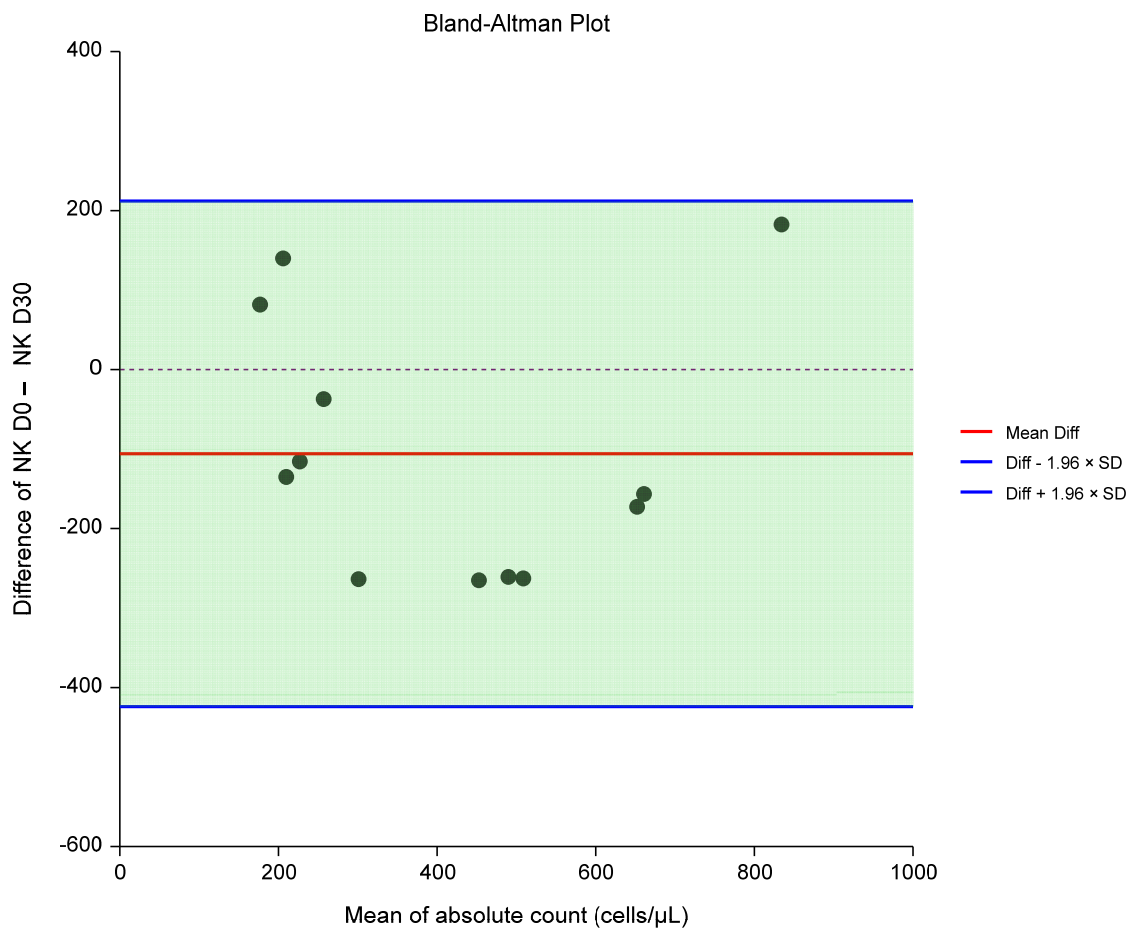

**Figure S22.** Bland-Altman plot of Absolute count of NK for Day 0 and Day 30 in test group.

**Table S22.** Bias and Limits of Agreement of Absolute count of NK for Day 0 and Day 30 in test group.

| Parameter                | Count | Value   | Standard Deviation | 95.0% LCL of Value | 95.0% UCL of Value |
|--------------------------|-------|---------|--------------------|--------------------|--------------------|
| Bias (Difference)        | 12    | -105.45 | 162.45             | -208.66            | -2.23              |
| Lower Limit of Agreement | 12    | -423.85 | 82.51              | -605.45            | -242.25            |
| Upper Limit of Agreement | 12    | 212.96  | 82.51              | 31.36              | 394.56             |

Limits of Agreement = Difference  $\pm$  1.96  $\times$  (Standard Deviation of Difference)

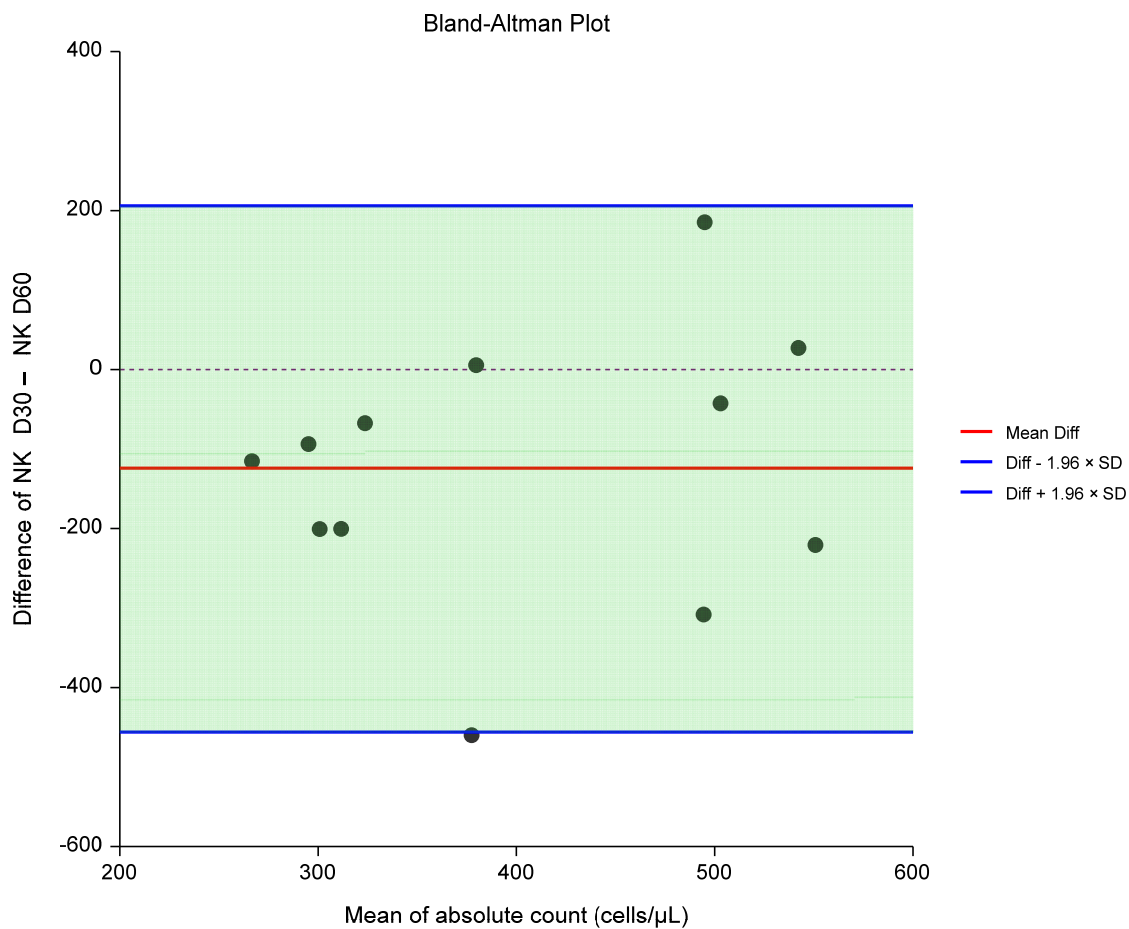

**Figure S23.** Bland-Altman plot of Absolute count of NK for Day 30 and Day 60 in placebo crossed over to test group.

**Table S23.** Bias and Limits of Agreement of Absolute count of NK for Day 30 and Day 60 in placebo crossed over to test group.

| Parameter                | Count | Value   | Standard Deviation | 95.0% LCL of Value | 95.0% UCL of Value |
|--------------------------|-------|---------|--------------------|--------------------|--------------------|
| Bias (Difference)        | 12    | -124.22 | 168.97             | -231.58            | -16.86             |
| Lower Limit of Agreement | 12    | -455.40 | 85.82              | -644.28            | -266.51            |
| Upper Limit of Agreement | 12    | 206.96  | 85.82              | 18.08              | 395.85             |

Limits of Agreement = Difference  $\pm$  1.96  $\times$  (Standard Deviation of Difference)

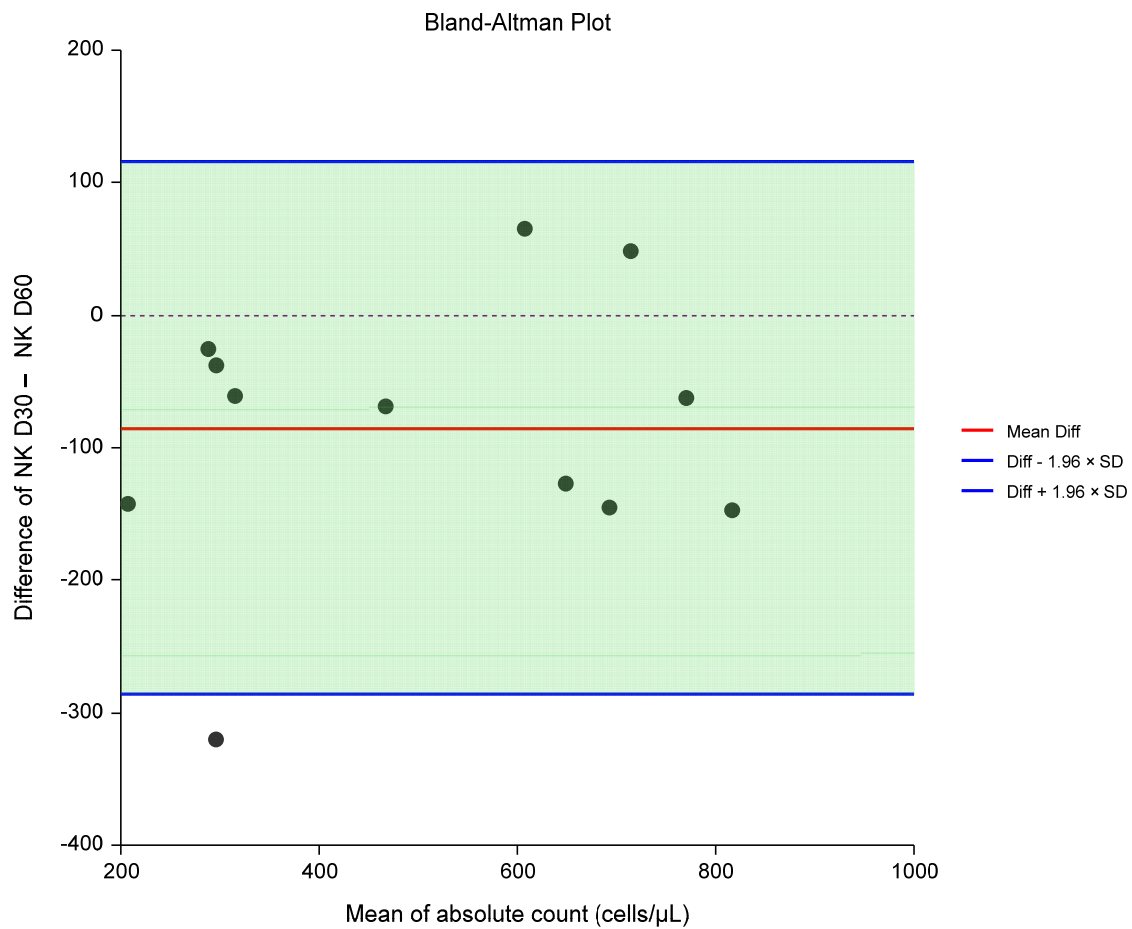

**Figure S24.** Bland-Altman plot of Absolute count of NK for Day 30 and Day 60 in test group.

**Table S24.** Bias and Limits of Agreement of Absolute count of NK for Day 30 and Day 60 in test group.

| Parameter                | Count | Value   | Standard Deviation | 95.0% LCL of Value | 95.0% UCL of Value |
|--------------------------|-------|---------|--------------------|--------------------|--------------------|
| Bias (Difference)        | 12    | -85.32  | 102.41             | -150.39            | -20.25             |
| Lower Limit of Agreement | 12    | -286.05 | 52.01              | -400.53            | -171.56            |
| Upper Limit of Agreement | 12    | 115.41  | 52.01              | 0.92               | 229.89             |

Limits of Agreement = Difference  $\pm$  1.96  $\times$  (Standard Deviation of Difference)
