# Supplementary material for: Immunomodulatory Effect of Withania somnifera (Ashwagandha) Extract—A Randomized, Double-Blind, Placebo Controlled Trial with an Open Label Extension on Healthy Participants
Source: MDPI journal article supplement (doi:10.3390/jcm10163644), 2021-08-18
Supplement: s1 [file s1]

## Supplementary file 5. Studies on Ashwagandha

| S.N | Study                          | Parts used       | Summary                                                                                                                                                                                                                                                                                                                                                                                                                                                                    |
|-----|--------------------------------|------------------|----------------------------------------------------------------------------------------------------------------------------------------------------------------------------------------------------------------------------------------------------------------------------------------------------------------------------------------------------------------------------------------------------------------------------------------------------------------------------|
| [1] | Khan, S. et al. 2009 [9]       | WS Leaf extract  | <ul style="list-style-type: none"> <li>Enhanced Th1 cytokine IFN-<math>\gamma</math> expression in Con A primed splenocytes in vitro.</li> <li>Dose-dependent proliferation of T cells and improved their ability to secrete IL-2 and IFN-<math>\gamma</math></li> <li>Prominent enhancement in proliferation and differentiation of lymphocytes.</li> </ul>                                                                                                               |
| [2] | Kaur T, 2017 [23]              | WS Leaf extract  | <ul style="list-style-type: none"> <li>The stress induced expression of inflammatory and immune response markers GFAP, TNF<math>\alpha</math>, IL-6, OX-18 and OX-42 in VSD animals was found to be modulated by ASH-WEX.</li> <li>The stress induced apoptosis was suppressed in WSD group as indicated by expression of NF-<math>\kappa</math>B, AP-1, Bcl-xL and Cytochrome c.</li> </ul>                                                                               |
| [3] | Kuttan, G. 1996 [11]           | WS Plant extract | <ul style="list-style-type: none"> <li>Significantly increase the total WBC count in normal Balb/c mice</li> <li>Reduced the leucopenia induced by sublethal dose of gamma radiation. <ul style="list-style-type: none"> <li>Increased the bone marrow cellularity significantly</li> </ul> </li> <li>Normalised the ratio of normochromatic erythrocytes and polychromatic erythrocytes in mice after the radiation exposure.</li> </ul>                                  |
| [4] | Ziauddin, M. et al., 1996 [12] | WS Plant extract | <ul style="list-style-type: none"> <li>Prevented myelosuppression in mice treated with cyclophosphamide, azathioprin, or prednisolone.</li> <li>A significant increase in hemoglobin concentration, red blood cell count, white blood cell count, platelet count and body weight was observed in Ashwagandha-treated mice as compared with untreated (control) mice.</li> <li>Significant increases in hemolytic antibody responses towards human erythrocytes.</li> </ul> |
| [5] | Davis & Kuttan 2002 [13]       | WS Plant extract | <ul style="list-style-type: none"> <li>Withania somnifera could stimulate the generation of cytotoxic T lymphocyte and it may reduce tumour growth.</li> </ul>                                                                                                                                                                                                                                                                                                             |
| [6] | Malik et al. 2007 [14]         | WS Root extract  | <ul style="list-style-type: none"> <li>Stimulated cell mediated immunity, IgM and IgG.</li> <li>Prominent enhancement in proliferation and differentiation of lymphocytes.</li> </ul>                                                                                                                                                                                                                                                                                      |

|      |                           |                 |                                                                                                                                                                                                                                                                                                                                                                                                                                              |
|------|---------------------------|-----------------|----------------------------------------------------------------------------------------------------------------------------------------------------------------------------------------------------------------------------------------------------------------------------------------------------------------------------------------------------------------------------------------------------------------------------------------------|
|      |                           |                 | <ul style="list-style-type: none"> <li>Enhanced expression of T helper cells (Th)1 cytokines interferon (IFN)-<math>\gamma</math> and interleukin (IL)-2 while Th2 cytokine IL-4 observed a moderate decline.</li> <li>Strongly activated macrophage functions indicated by enhanced secretion of nitrite, IL-12 and TNF-<math>\alpha</math>.</li> <li>Supports predominantly Th1 immunity with increase in macrophage functions.</li> </ul> |
| [7]  | Priyanka G 2020 [24]      | WS Root extract | <ul style="list-style-type: none"> <li>Statistically significant (<math>p &lt; 0.05</math>) increase in total erythrocyte count, total leucocyte count, hemoglobin content, lymphocyte percentage</li> </ul>                                                                                                                                                                                                                                 |
| [8]  | Kumar J, 2019 [25]        | WS Root extract | <ul style="list-style-type: none"> <li>Co-treatment with zinc oxide nanoparticles (WS + ZnO NPs), Withaferin A along with zinc oxide nanoparticles (WA + ZnO NPs)-enhance phagocytic activity by counteracting mechanism of ZnO NPs toxicity</li> </ul>                                                                                                                                                                                      |
| [9]  | Barua A, 2013 [26]        | WS Root powder  | <ul style="list-style-type: none"> <li>Ashwagandha supplementation decreased the incidence and progression of OVCA. <ul style="list-style-type: none"> <li>Both the stromal and intratumoral NK cell population increased significantly in Ashwagandha supplemented hens.</li> </ul> </li> </ul>                                                                                                                                             |
| [10] | Turrini E, 2016 [27]      | WS Root extract | <ul style="list-style-type: none"> <li>Results show that WS has a significant cytotoxic and cytostatic potential, and induces ICD.</li> <li>Its proapoptotic mechanism involves intracellular Ca(2+) accumulation and the generation of reactive oxygen species.</li> </ul>                                                                                                                                                                  |
| [11] | Maurya SP, 2019 [28]      | WS Root extract | <ul style="list-style-type: none"> <li>An overall decline in the percentage of CD38 expressing CD8 + T lymphocytes was observed, though the statistical significance was varied with different categories of HIV patients.</li> </ul>                                                                                                                                                                                                        |
| [12] | Bani, S. et al. 2006 [10] | WS Root extract | <ul style="list-style-type: none"> <li>Roots aqueous extract at 100 mg/kg resulted significant selective up-regulation of Th1 response.</li> <li>Significant increase in CD4 and CD8 counts as compared to control and cyclosporin A, with a faster recovery of CD4+ T cells in immunosuppressed animals.</li> </ul>                                                                                                                         |
