# Supplementary material for: Immunomodulatory Effect of Withania somnifera (Ashwagandha) Extract—A Randomized, Double-Blind, Placebo Controlled Trial with an Open Label Extension on Healthy Participants
Source: J Clin Med. 2021 Aug 18;10(16):3644. doi: 10.3390/jcm10163644 (PMC8397213; doi:10.3390/jcm10163644)
Supplement: Supplementary file 1 [file jcm-10-03644-s001.zip]

Archive with 5 entries (5 files):
- Supplementary file 1 - final.pdf
- supplementary file 2 - final.pdf
- supplementary file 3 - final.pdf
- supplementary file 4 - final.pdf
- supplementary file 5 - final.pdf
